# Supplementary material for: Total synthesis of (−)-amathaspiramide A via a one-pot aldol addition/transamidification reaction
Source: Royal Society of Chemistry journal article supplement (doi:10.1039/d2qo00032f), 2022-01-01
Supplement: d2qo00032f1.pdf [file d2qo00032f1.pdf]

## Supporting Information

### Total Synthesis of (-)-Amathaspiramide A via One-pot Aldol Addition/Transamidification Reaction

Jun-Jie Wang,<sup>a</sup> Rui-Xue Bai,<sup>b</sup> Mao-Qi Yang,<sup>a</sup> Zheng-Yu Chen,<sup>a</sup> Min-Dan Wang,<sup>a</sup> Qian Zhao,<sup>\*a</sup>  
Guo-Qiang Lin,<sup>ab</sup> Jian-Guo Fu,<sup>\*a</sup> Chen-Guo Feng<sup>\*ab</sup>

<sup>a</sup>The Research Center of Chiral Drugs, Innovation Research Institute of Traditional Chinese Medicine, Shanghai  
University of Traditional Chinese Medicine, Shanghai, 201203, China.

<sup>b</sup>Key Laboratory of Synthetic Chemistry of Natural Substances, Center for Excellence in Molecular Synthesis,  
Shanghai Institute of Organic Chemistry, University of Chinese Academy of Sciences, Shanghai, 200032, China.

### Table of contents

|                                                                                  |     |
|----------------------------------------------------------------------------------|-----|
| <b>1. General Information</b> .....                                              | S2  |
| <b>2. Experimental Procedures and Spectral Data</b> .....                        | S3  |
| Synthesis of Amathaspiramide A .....                                             | S3  |
| Methylation and Dehydroxylation from <b>6a</b> .....                             | S11 |
| Preparation of Ketoamides <b>4a-f</b> .....                                      | S12 |
| Substrate Scope of Aldol Addition/Transamidification .....                       | S15 |
| <b>3. Comparison of NMR Data of Synthetic and Natural amathaspiramide A</b> .... | S22 |
| <b>4. NMR Spectra</b> .....                                                      | S24 |
| <b>5. X-Ray Structure of 6a (CCDC-2133176)</b> .....                             | S59 |
| <b>6. References and Notes</b> .....                                             | S60 |

## 1. General Information

All anhydrous reactions were run under a positive pressure of nitrogen. Anhydrous solvents were obtained using standard drying techniques. Commercial grade reagents were used without further purification. Flash chromatography was performed on 300-400 mesh silica gel with the indicated solvent systems.  $^1\text{H}$  NMR spectras were recorded on a Brüker Avance-600 HD (600 MHz) spectrometer and chemical shifts are reported in ppm down field from TMS, using TMS (0.00 ppm), residual  $\text{CDCl}_3$  (7.26 ppm), residual  $\text{CD}_3\text{OD}$  (3.31 ppm) or residual  $\text{DMSO-}d_6$  (2.50 ppm) as an internal standard. Datas are reported as: (s = singlet, br = broad, d = doublet, t = triplet, q = quartet, m = multiplet; J = coupling constant in Hz, integration.).  $^{13}\text{C}$  NMR spectras were recorded on a Bruker Avance-600 HD (150 MHz) spectrometer, using proton decoupling unless otherwise noted. High-resolution mass spectras were determined on an Aglient 6545 Accurate-Mass Q-TOF spectrometer. Optical rotations were measured on a Anton Paar MCP 5500 automatic polarimeter. Infrared spectras were recorded on a Shimadzu Fourier Transform Infrared Spectrophotometer IRAffinity-1. Melting points were determined on a digital melting point apparatus and temperatures were uncorrected. X-ray structure was determined on a Bruker D8 Venture X-ray Diffraction meter.

## 2. Experimental Procedures and Spectral Data

### Synthesis of Amathaspiramide A

#### The Synthetic Route:

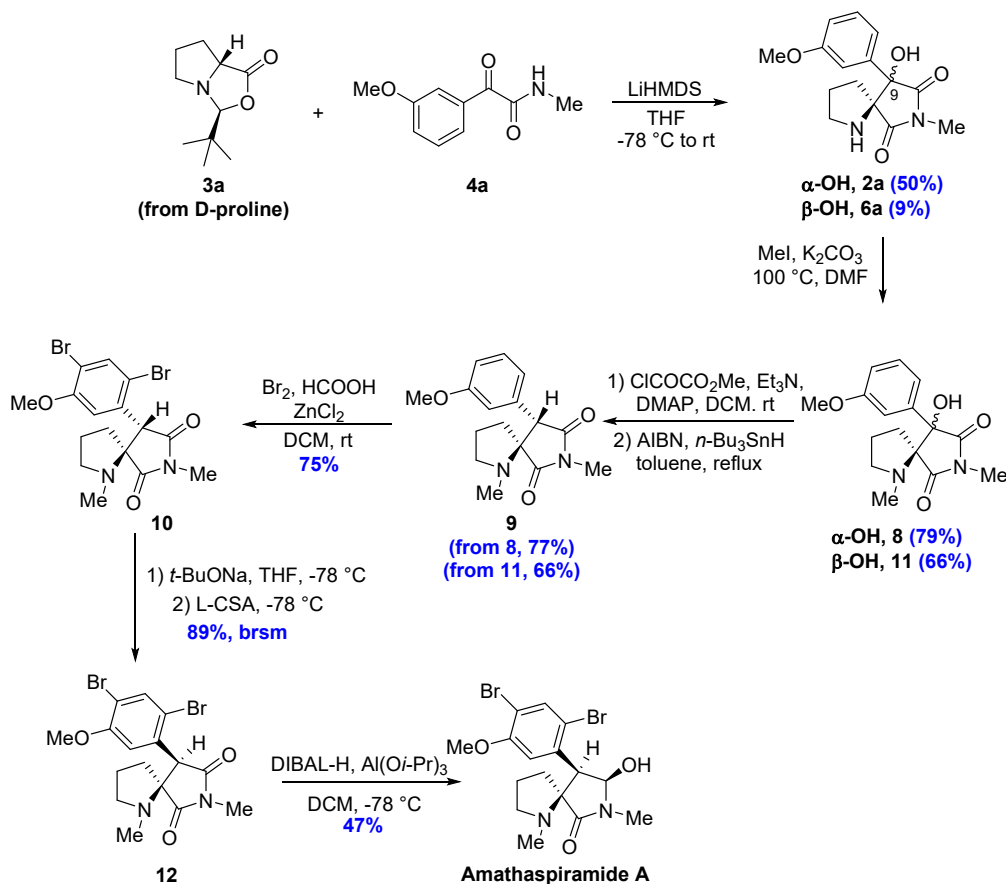

#### (5*S*,9*S*)-9-hydroxy-9-(3-methoxyphenyl)-7-methyl-1,7-diazaspiro[4.4]nonane-6,8-dione (**2a**)

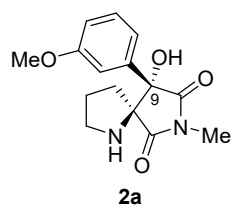

The acetal derived **3a** was prepared according to the literature<sup>1</sup>. In a 500 ml flask, LiHMDS (1.0 M solution in THF, 52 ml, 52.0 mmol) was added to THF (80 ml). After the solution cooled down to -78 °C, compound **3a** (6.40 g, 34.8 mmol) in THF (80 ml) was added dropwise over 10 min and the mixture was stirred at the temperature for 30 min. Compound **4a** (3.36 g, 17.4 mmol) in THF (136 ml) was added dropwise over 20 min. After stirring at -78 °C for 2.5 h, the mixture was gradually warmed to room temperature for a period over 1.5 h and stirred for another 2 h. A saturated solution of NH<sub>4</sub>Cl was

added, followed by removal of THF under reduced pressure. The residue was extracted with CH<sub>2</sub>Cl<sub>2</sub> for three times. The combined organic layers were dried over anhydrous Na<sub>2</sub>SO<sub>4</sub> before the solvent was removed under reduced pressure. The residual was subjected to flash chromatography on silica gel (PE/EtOAc = 1/1) to give **2a** in 50% yield (2.52 g), **6a** in 9% yield (0.45 g) and **7a** in 10% yield (0.65 g).

[ $\alpha$ ]<sub>D</sub><sup>25</sup> +0.46 (c = 1.00, CHCl<sub>3</sub>); <sup>1</sup>H NMR (600 MHz, CDCl<sub>3</sub>)  $\delta$  7.29-7.25 (m, 1H), 6.91-6.89 (m, 1H), 6.86 (dd, *J* = 7.8, 2.4 Hz, 1H), 6.74 (dd, *J* = 7.8, 0.6 Hz, 1H), 3.80 (s, 3H), 3.16 (s, 3H), 3.09-3.04 (m, 1H), 2.90-2.85 (m, 1H), 2.57-2.52 (m, 1H), 1.97-1.85 (m, 3H); <sup>13</sup>C NMR (150 MHz, CDCl<sub>3</sub>)  $\delta$  180.1, 177.5, 159.9, 139.8, 129.9, 117.2, 113.8, 111.7, 82.0, 74.2, 55.3, 47.2, 33.2, 25.3, 25.2; IR (thin film): 2951, 1705, 1598, 1433, 1382, 1290, 1062, 788 cm<sup>-1</sup>; LRMS (ESI): 291 (M+H)<sup>+</sup>; HRMS (ESI): calcd for C<sub>15</sub>H<sub>19</sub>N<sub>2</sub>O<sub>4</sub> (M+H)<sup>+</sup>: 291.1339, found: 291.1338; mp: 85-87 °C.

**(5*S*,9*R*)-9-hydroxy-9-(3-methoxyphenyl)-7-methyl-1,7-diazaspiro[4.4]nonane-6,8-dione (6a)**

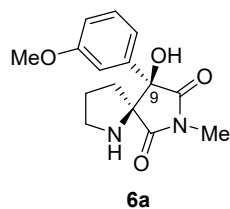

[ $\alpha$ ]<sub>D</sub><sup>25</sup> +13.02 (c = 1.00, CHCl<sub>3</sub>); <sup>1</sup>H NMR (600 MHz, CDCl<sub>3</sub>)  $\delta$  7.26 (t, *J* = 7.8 Hz, 1H), 6.98-6.96 (m, 1H), 6.86 (dd, *J* = 7.8, 2.4 Hz, 1H), 6.78 (d, *J* = 7.8 Hz, 1H), 3.81 (s, 3H), 3.20-3.15 (m, 1H), 3.14 (s, 3H), 3.01-2.96 (m, 2H), 1.99-1.92 (m, 1H), 1.85-1.78 (m, 1H), 1.58-1.53 (m, 1H), 1.44-1.36 (m, 1H); <sup>13</sup>C NMR (150 MHz, CDCl<sub>3</sub>)  $\delta$  179.1, 177.1, 159.7, 139.5, 129.4, 118.2, 113.6, 112.0, 78.1, 72.8, 55.3, 47.7, 32.3, 26.4, 25.4; IR (thin film): 3325, 2949, 1780, 1707, 1600, 1583, 1431, 1379, 1290, 1049 cm<sup>-1</sup>; LRMS (ESI): 291 (M+H)<sup>+</sup>; HRMS (ESI): calcd for C<sub>15</sub>H<sub>19</sub>N<sub>2</sub>O<sub>4</sub> (M+H)<sup>+</sup>: 291.1339, found: 291.1338; mp: 98-100 °C.

**(*S*)-2-((3*S*,7*aS*)-3-(*tert*-butyl)-1-oxodihydro-1*H*,3*H*-pyrrolo[1,2-*c*]oxazol-7*a*(5*H*)-yl)-2-hydroxy-2-(3-methoxyphenyl)-*N*-methylacetamide (7a)**

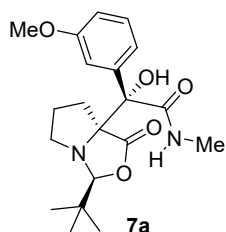

**7a:** Orange solid (10% yield) [ $\alpha$ ]<sub>D</sub><sup>25</sup> +81.16 (c = 1.00, CHCl<sub>3</sub>); <sup>1</sup>H NMR (600 MHz, CDCl<sub>3</sub>)  $\delta$  8.47 (br s, 1H), 7.38-7.36 (m, 1H), 7.29-7.26 (m, 1H), 7.20 (t, *J* = 7.8 Hz, 1H), 6.81 (dd, *J* = 7.8, 1.8 Hz, 1H);

Hz, 1H), 4.72 (s, 1H), 4.12 (s, 1H), 3.80 (s, 3H), 3.18-3.12 (m, 1H), 2.90 (d,  $J = 4.8$  Hz, 3H), 2.82-2.76 (m, 1H), 2.41-2.34 (m, 1H), 2.17-2.11 (m, 1H), 1.81-1.74 (m, 1H), 1.71-1.66 (m, 1H), 0.67 (s, 9H);  $^{13}\text{C}$  NMR (150 MHz,  $\text{CDCl}_3$ )  $\delta$  178.1, 172.9, 159.4, 140.6, 128.9, 119.4, 113.9, 113.5, 103.7, 81.6, 80.0, 56.9, 55.3, 35.9, 35.6, 26.9, 24.2, 24.1; IR (thin film): 3410, 2958, 1772, 1654, 1581, 1483, 1363, 1253, 1193, 1041, 779  $\text{cm}^{-1}$ ; LRMS (ESI): 377 (M+H) $^+$ ; HRMS (ESI): calcd for  $\text{C}_{20}\text{H}_{29}\text{N}_2\text{O}_5$  (M+H) $^+$ : 377.2071, found: 377.2073; mp: 90-92  $^\circ\text{C}$

**(5*S*,9*S*)-9-hydroxy-9-(3-methoxyphenyl)-1,7-dimethyl-1,7-diazaspiro[4.4]nonane-6,8-dione (8)**

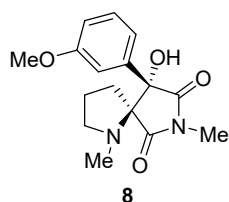

MeI (0.36 mL, 5.8 mmol) was added dropwise to a 100 ml flask charged with compound **2a** (1.12g, 3.9 mmol),  $\text{K}_2\text{CO}_3$  (1.06 g, 7.8 mmol) and DMF (39 mL). After stirring at 100  $^\circ\text{C}$  for 5 h, the suspension was filtered, and the filtrate was concentrated under reduced pressure, diluted with EtOAc, washed with water and brine, and dried over anhydrous  $\text{Na}_2\text{SO}_4$  before the solvent was removed under reduced pressure. The residue was purified *via* flash chromatography on silica gel (PE/EtOAc = 3/1) to give **8** (0.94 g, 79%) as a yellow solid.

$[\alpha]_{25}^{\text{D}} -49.85$  ( $c = 1.00$ ,  $\text{CHCl}_3$ );  $^1\text{H}$  NMR (600 MHz,  $\text{CDCl}_3$ )  $\delta$  7.21 (dd,  $J = 8.4, 7.8$  Hz, 1H), 6.92-6.90 (m, 1H), 6.86 (ddd,  $J = 8.4, 1.8, 0.6$  Hz, 1H), 6.79 (ddd,  $J = 7.8, 1.8, 0.6$  Hz, 1H), 3.80 (s, 3H), 3.15 (s, 3H), 3.12 (s, 1H), 3.02-2.97 (m, 1H), 2.84-2.79 (m, 1H), 2.72-2.67 (m, 1H), 2.03-1.97 (m, 1H), 1.95-1.89 (m, 1H), 1.88-1.83 (m, 1H), 1.76 (s, 3H);  $^{13}\text{C}$  NMR (150 MHz,  $\text{CDCl}_3$ )  $\delta$  178.2, 177.8, 159.3, 140.4, 128.9, 119.0, 113.7, 113.6, 81.3, 76.1, 56.6, 55.3, 36.2, 35.0, 24.4, 24.2; IR (thin film): 3446, 2949, 1701, 1600, 1489, 1431, 1379, 1290, 1045, 792  $\text{cm}^{-1}$ ; LRMS (ESI): 305 (M+H) $^+$ ; HRMS (ESI): calcd for  $\text{C}_{16}\text{H}_{21}\text{N}_2\text{O}_4$  (M+H) $^+$ : 305.1496, found: 305.1496; mp: 70-72  $^\circ\text{C}$ .

**The Detailed Investigation of Deoxygenation**

**Table 1 Deoxygenation of Tertiary Alcohol 8**

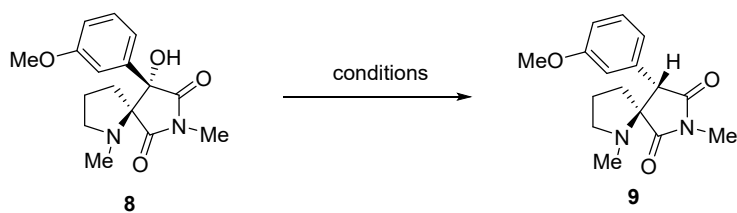

| Entry | Conditions                                                                                                         | Isolate yield     |
|-------|--------------------------------------------------------------------------------------------------------------------|-------------------|
| 1     | Me <sub>3</sub> SiH, TFA, DCM, 0 to 25 °C                                                                          | n.r. <sup>a</sup> |
| 2     | Pd(OH) <sub>2</sub> /C, MeOH, H <sub>2</sub> , 65 °C, 50 psi                                                       | n.r.              |
| 3     | SnCl <sub>2</sub> ·2H <sub>2</sub> O, AcOH/HCl, 80 °C                                                              | n.r.              |
| 4     | 1) NaH, CS <sub>2</sub> , MeI, THF, 0 to 25 °C<br>2) AIBN, <i>n</i> -Bu <sub>3</sub> SnH, toluene, reflux          | n.d. <sup>b</sup> |
| 5     | 1) ClCOCO <sub>2</sub> Me, Et <sub>3</sub> N, DMAP, DCM<br>2) AIBN, <i>n</i> -Bu <sub>3</sub> SnH, toluene, reflux | 50%               |

<sup>a</sup> n.r. stands for no reaction. <sup>b</sup> n.d. stands for not detected.

**(5*S*,9*S*)-9-(3-methoxyphenyl)-1,7-dimethyl-1,7-diazaspiro[4.4]nonane-6,8-dione (9)**

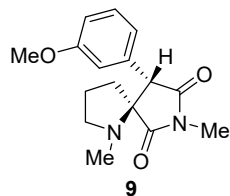

To a solution of **8** (610 mg, 2.0 mmol) and DMAP (25 mg, 0.2 mmol) in CH<sub>2</sub>Cl<sub>2</sub> (20 mL) was added triethylamine (0.42 mL, 3.0 mmol) slowly at 0 °C. Then methyl chlorooxalate (0.28 mL, 3.0 mmol) was added dropwise, and the mixture was stirred at room temperature for 1 h. The resulting solution was washed with water, dried over anhydrous Na<sub>2</sub>SO<sub>4</sub>, and concentrated to give yellow oil, which was used in the next step without further purification. To a solution of the crude product in degassed toluene (30 mL) was added AIBN (33 mg, 0.2 mmol) and *n*-Bu<sub>3</sub>SnH (1.35 mL, 5.0 mmol). The solution was heated to 110 °C in an oil bath under nitrogen and stirred for 10 h. Then the resulting mixture was cooled to room temperature and evaporated. The residue was purified *via* flash chromatography (10% w/w anhydrous K<sub>2</sub>CO<sub>3</sub>-silica<sup>2</sup>; PE/EA = 3/1) to give **9** (288 mg, 50%, 77% brsm) as yellow oil and recovered **8** (210 mg, 34%). For **9**, NMR spectra of NOESY were given to assign its stereochemistry.

[α]<sub>D</sub><sup>25</sup> +6.70 (c = 0.50, CHCl<sub>3</sub>); <sup>1</sup>H NMR (600 MHz, CDCl<sub>3</sub>) δ 7.26 (t, *J* = 7.8 Hz,

1H), 6.84 (dd,  $J = 7.8, 1.8$  Hz, 1H), 6.69 (d,  $J = 7.8$  Hz, 1H), 6.67-6.65 (m, 1H), 3.91 (s, 1H), 3.79 (s, 3H), 3.10 (s, 3H), 3.06-3.02 (m, 1H), 2.99-2.93 (m, 1H), 2.40 (s, 3H), 1.88-1.78 (m, 2H), 1.58-1.47 (m, 2H);  $^{13}\text{C}$  NMR (150 MHz,  $\text{CDCl}_3$ )  $\delta$  179.2, 176.5, 159.8, 136.2, 129.8, 121.2, 115.2, 112.9, 73.0, 55.3, 54.6, 54.2, 34.8, 32.6, 24.5, 21.9; IR (thin film): 2931, 1770, 1697, 1539, 1506, 1456, 1377, 1271, 1028, 785  $\text{cm}^{-1}$ ; LRMS (ESI): 289 (M+H) $^+$ ; HRMS (ESI): calcd for  $\text{C}_{16}\text{H}_{21}\text{N}_2\text{O}_3$  (M+H) $^+$ : 289.1547, found: 289.1546.

**(5*S*,9*S*)-9-(2,4-dibromo-5-methoxyphenyl)-1,7-dimethyl-1,7-diazaspiro[4.4]nonane-6,8-dione (10)**

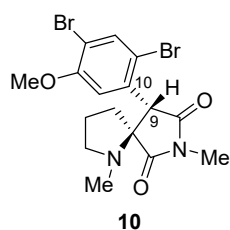

To a suspension of **9** (0.33 g, 1.13 mmol), zinc chloride (1.27 g, 9.3 mmol) and formic acid (0.88 mL, 23.3 mmol) in DCM (3.00 mL) was added bromine (0.24 mL, 4.7 mmol) in DCM (4.7 mL) dropwise over a period of 10 min at room temperature. After stirring for 10 h, the reaction mixture was quenched with a saturated solution of  $\text{Na}_2\text{SO}_3$ , extracted with  $\text{CH}_2\text{Cl}_2$  for 3 times, dried over anhydrous  $\text{Na}_2\text{SO}_4$ , concentrated, and purified *via* flash chromatography on silica gel (PE/EA = 1/1) to give **10** (0.38 g, 75%) as yellow oil, which was a mixture of atropisomers (1.1:1).

Atropisomers at C9-C10 bond $^3$ ;  $[\alpha]_{25}^D$  -21.74 ( $c = 1.00$ ,  $\text{CHCl}_3$ ); **Major**:  $^1\text{H}$  NMR (600 MHz,  $\text{CDCl}_3$ )  $\delta$  7.78 (s, 1H), 6.36 (s, 1H), 4.60 (s, 1H), 3.81 (s, 3H), 3.12 (s, 3H), 3.11-3.08 (m, 1H), 3.00-2.96 (m, 1H), 2.44 (s, 3H), 2.33-2.28 (m, 1H), 1.95-1.79 (m, 1H), 1.65-1.52 (m, 2H); **Minor**:  $^1\text{H}$  NMR (600 MHz,  $\text{CDCl}_3$ ) 7.72 (s, 1H), 6.74 (s, 1H), 3.92 (s, 3H), 3.84 (s, 1H), 3.07 (s, 3H), 3.04-3.01 (m, 1H), 2.93-2.88 (m, 1H), 2.36 (s, 3H), 1.95-1.79 (m, 2H), 1.65-1.52 (m, 2H);  $^{13}\text{C}$  NMR (150 MHz,  $\text{CDCl}_3$ )  $\delta$  179.0, 178.6, 176.0, 175.1, 155.6, 155.4, 137.7, 136.7, 135.3, 135.1, 117.8, 117.0, 113.6, 112.9, 112.9, 112.3, 73.5, 71.8, 57.8, 56.7, 56.6, 54.5, 54.1, 53.1, 34.9, 34.6, 33.0, 31.0, 24.7, 24.7, 22.2, 21.9; IR (thin film): 2933, 2850, 1699, 1471, 1379, 1288, 1247, 1056  $\text{cm}^{-1}$ ; LRMS (ESI): 447 (M+H) $^+$ ; HRMS (ESI): calcd for  $\text{C}_{16}\text{H}_{19}\text{Br}_2\text{N}_2\text{O}_3$  (M+H) $^+$ : 446.9736, found: 446.9738.

**(5*S*,9*R*)-9-(2,4-dibromo-5-methoxyphenyl)-1,7-dimethyl-1,7-diazaspiro[4.4]nonane-6,8-dione (**12**)**

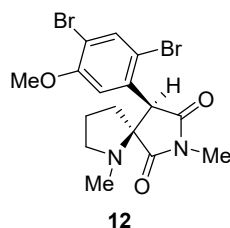

To a suspension of *t*-BuONa (54 mg, 0.562 mmol) in THF (4.5 mL) was added **10** (152 mg, 0.34 mmol) in THF (3 mL) dropwise over a period of 5 min at -78 °C. After stirring at this temperature for 1 h, the mixture was added precooled L-camphorsulfonic acid (174 mg, 0.75 mmol) in THF (7.5 mL) slowly. After the mixture was stirred for another 1 h at -78 °C, the reaction was quenched with saturated aqueous NH<sub>4</sub>Cl. The resulting mixture was then allowed to warm to room temperature, extracted with EtOAc for 3 times, dried over anhydrous Na<sub>2</sub>SO<sub>4</sub>, concentrated, and purified *via* flash chromatography on silica gel (PE/EtOAc = 5/1) to give **12** (76 mg, 50%, 89% brsm) as a white solid, along with recovered **10** (67 mg, 44%). For **12**, NMR spectra of NOESY was given to assign its stereochemistry.

[ $\alpha$ ]<sub>D</sub><sup>25</sup> -16.30 (c = 1.00, CHCl<sub>3</sub>); <sup>1</sup>H NMR (600 MHz, CDCl<sub>3</sub>)  $\delta$  7.76 (s, 1H), 6.56 (s, 1H), 4.56 (s, 1H), 3.82 (s, 3H), 3.13 (s, 3H), 2.91 (t, *J* = 7.6 Hz, 1H), 2.77-2.71 (m, 1H), 2.57-2.50 (m, 1H), 2.50-2.44 (m, 1H), 2.16 (s, 3H), 1.87-1.77 (m, 2H); <sup>13</sup>C NMR (150 MHz, CDCl<sub>3</sub>)  $\delta$  178.4, 176.6, 154.7, 136.2, 134.0, 117.1, 114.7, 111.9, 72.6, 57.2, 56.9, 56.5, 37.9, 37.0, 24.9, 23.8; IR (thin film): 2926, 1703, 1454, 1367, 1286, 1246, 1056, 1026 cm<sup>-1</sup>; LRMS (ESI): 447 (M+H)<sup>+</sup>; HRMS (ESI): calcd for C<sub>16</sub>H<sub>19</sub>Br<sub>2</sub>N<sub>2</sub>O<sub>3</sub> (M+H)<sup>+</sup>: 446.9736, found: 446.9741; mp: 91-93 °C.



## The Detailed Investigation of Reduction of Cyclic Imide 12

**Table 2 Carbonyl Reduction of Cyclic Imide 12**

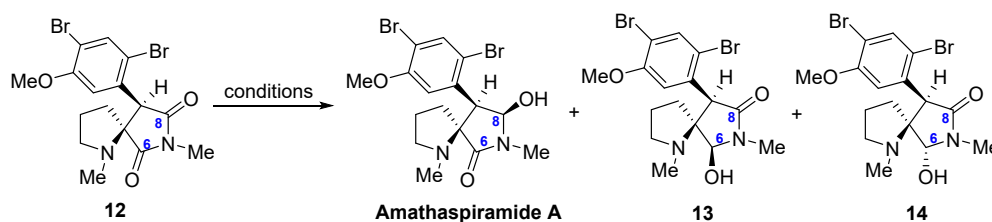

| Entry | Conditions                                    | T.M. (%) <sup>a</sup> | 13 (%) | 14 (%)            |
|-------|-----------------------------------------------|-----------------------|--------|-------------------|
| 1     | DIBAL-H, DCM, -78 °C                          | 30                    | 43     | n.d. <sup>b</sup> |
| 2     | DIBAL-H, Al(Oi-Pr) <sub>3</sub> , DCM, -78 °C | 47                    | 43     | n.d.              |
| 3     | DIBAL-H, THF, -78 °C                          | 30                    | 61     | n.d.              |
| 4     | DIBAL-H, toluene, -78 °C                      | 20                    | 60     | n.d.              |
| 5     | DIBAL-H, DCM, -30 °C                          | 15                    | 37     | n.d.              |
| 6     | LiAlH <sub>4</sub> , THF, -78 °C              | n.d.                  | 53     | n.d.              |
| 7     | NaBH <sub>4</sub> , MeOH/THF, 0 °C            | n.d.                  | 53     | 14                |
| 8     | L-selectride, THF, -78 °C                     | 8                     | 26     | 8                 |

<sup>a</sup> H<sup>1</sup>NMR yield. <sup>b</sup> n.d. stands for not detected.

### (5*S*,8*R*,9*R*)-9-(2,4-dibromo-5-methoxyphenyl)-8-hydroxy-1,7-dimethyl-1,7-diazaspiro[4.4]nonan-6-one

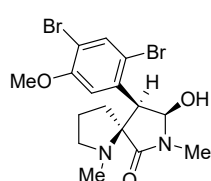

**Amathaspiramide A**

To a solution of **12** (45 mg, 0.1 mmol) and Al(Oi-Pr)<sub>3</sub> (41 mg, 0.2 mmol) in DCM (2 mL) at -78 °C was added DIBAL-H (1.0 M in THF, 1 mL, 1 mmol) dropwise over a period of 15 min at -78 °C. After stirring at the same temperature for 2 h, the reaction mixture was quenched with MeOH (50 μL), a saturated solution of NH<sub>4</sub>Cl (0.5 mL) and saturated aqueous Rochelle's salt (1 mL). The reaction was allowed to warm to room temperature and stirring was continued for 2 h. The resulting mixture was then extracted with DCM for 3 times, dried over anhydrous Na<sub>2</sub>SO<sub>4</sub>, concentrated, and purified *via* flash chromatography on silica gel (PE/EtOAc = 1/1) to give amathaspiramide A (21 mg, 47%) as a white solid and **13** (19 mg, 43%) as yellow oil.

[ $\alpha$ ]<sub>D</sub><sup>25</sup> +1.30 (c = 0.20, MeOH); <sup>1</sup>H NMR (600 MHz, CDCl<sub>3</sub>)  $\delta$  7.76-7.73 (m, 2H), 5.17 (d, *J* = 5.4 Hz, 1H), 3.92 (d, *J* = 5.4 Hz, 1H), 3.87 (s, 3H), 3.00 (s, 3H), 2.97-2.93

(m, 1H), 2.85-2.79 (m, 1H), 2.52 (s, 3H), 2.44-2.37 (m, 1H), 1.92-1.85 (m, 1H), 1.80-1.73 (m, 1H), 1.41-1.32 (m, 1H);  $^{13}\text{C}$  NMR (150 MHz,  $\text{CDCl}_3$ )  $\delta$  174.9, 154.3, 135.2, 134.5, 118.0, 117.0, 111.1, 82.6, 71.2, 57.4, 56.2, 51.3, 37.1, 36.6, 27.7, 23.7.; IR (thin film): 3305, 2927, 1666, 1462, 1371, 1249, 1093, 1051, 740  $\text{cm}^{-1}$ ; LRMS (ESI): 449 ( $\text{M}+\text{H}$ ) $^+$ ; HRMS (ESI): calcd for  $\text{C}_{16}\text{H}_{21}\text{Br}_2\text{N}_2\text{O}_3$  ( $\text{M}+\text{H}$ ) $^+$ : 448.9893, found: 448.9894; mp: 174-176  $^\circ\text{C}$ .

**(5S,6S,9R)-9-(2,4-dibromo-5-methoxyphenyl)-6-hydroxy-1,7-dimethyl-1,7-diazaspiro[4.4]nonan-8-one (13)**

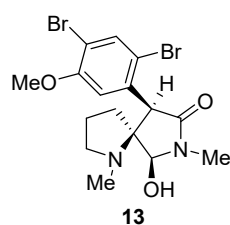

$[\alpha]_{25}^{\text{D}} -3.12$  ( $c = 0.50$ ,  $\text{CHCl}_3$ );  $^1\text{H}$  NMR (600 MHz,  $\text{CDCl}_3$ )  $\delta$  7.73 (s, 1H), 7.26 (s, 1H), 4.77 (s, 1H), 4.21 (s, 1H), 3.85 (s, 3H), 3.05 – 2.96 (m, 4H), 2.57-2.51 (m, 1H), 2.44-2.37 (m, 4H), 2.03-1.96 (m, 1H), 1.89-1.82 (m, 1H), 1.79-1.73 (m, 1H);  $^{13}\text{C}$  NMR

(150 MHz,  $\text{CDCl}_3$ )  $\delta$  172.1, 155.0, 136.3, 135.8, 117.3, 115.5, 111.7, 86.4, 72.9, 56.5, 55.5, 55.4, 37.5, 35.7, 27.4, 21.6; IR (thin film): 2957, 2922, 1663, 1456, 1373, 1260, 1096, 1018, 799  $\text{cm}^{-1}$ ; LRMS (ESI): 449 ( $\text{M}+\text{H}$ ) $^+$ ; HRMS (ESI): calcd for  $\text{C}_{16}\text{H}_{21}\text{Br}_2\text{N}_2\text{O}_3$  ( $\text{M}+\text{H}$ ) $^+$ : 448.9898, found: 448.9893

**(5S,6R,9R)-9-(2,4-dibromo-5-methoxyphenyl)-6-hydroxy-1,7-dimethyl-1,7-diazaspiro[4.4]nonan-8-one (14)**

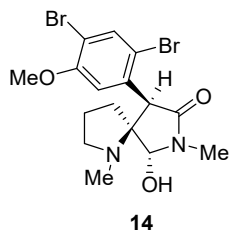

To a solution of **12** (45 mg, 0.1 mmol) in THF (2.5 mL) and MeOH (2.5 mL) at 0  $^\circ\text{C}$  was added  $\text{NaBH}_4$  (11 mg, 0.3 mmol). After stirring at the same temperature for 1 h, the reaction was quenched with water. Then the mixture was extracted with DCM for 3 times,

dried over anhydrous  $\text{Na}_2\text{SO}_4$ , concentrated, and purified *via* flash chromatography on silica gel (PE/EtOAc = 1/2) to give **13** (24 mg, 53%) and **14** (6 mg, 14%) as yellow oil.  $[\alpha]_{25}^{\text{D}} -12.40$  ( $c = 0.10$ ,  $\text{CHCl}_3$ );  $^1\text{H}$  NMR (600 MHz,  $\text{CDCl}_3$ )  $\delta$  7.72 (s, 1H), 6.77 (s, 1H), 4.84 (s, 1H), 4.49 (s, 1H), 3.84 (s, 3H), 3.00 (s, 3H), 2.88-2.82 (m, 1H), 2.60-2.53 (m, 1H), 2.38 (s, 3H), 2.24-2.13 (m, 2H), 1.66-1.58 (m, 1H), 1.43-1.37 (m, 1H);  $^{13}\text{C}$  NMR (150 MHz,  $\text{CDCl}_3$ )  $\delta$  171.5, 154.5, 135.6, 134.3, 117.2, 116.3, 111.3, 84.7, 72.7,

56.3, 55.6, 53.0, 36.1, 32.5, 27.3, 22.0; **IR** (thin film): 3331, 2924, 1682, 1584, 1462, 1368, 1260, 1057, 800, 735; **LRMS** (ESI): 449 (M+H)<sup>+</sup>; **HRMS** (ESI): calcd for C<sub>16</sub>H<sub>21</sub>Br<sub>2</sub>N<sub>2</sub>O<sub>3</sub> (M+H)<sup>+</sup>: 448.9898, found: 448.9890

## Methylation and Dehydroxylation from **6a**

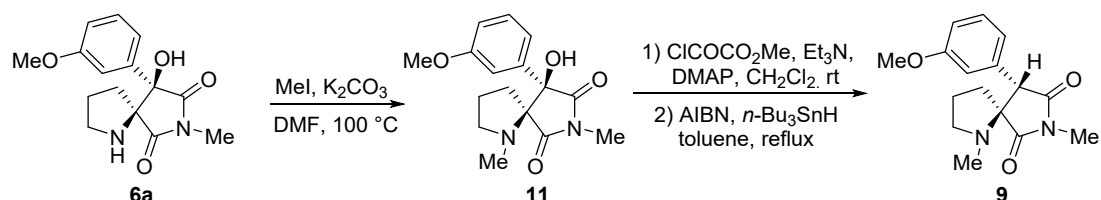

MeI (22  $\mu$ L, 0.35 mmol) was added dropwise to a 25 ml flask charged with compound **6a** (67 mg, 0.23 mmol), K<sub>2</sub>CO<sub>3</sub> (63 mg, 0.46 mmol) and DMF (2.3 mL). After stirring at 100 °C for 5 h, the suspension was filtered, and the filtrate was concentrated under reduced pressure, diluted with EtOAc, washed with water and brine and dried over anhydrous Na<sub>2</sub>SO<sub>4</sub> before the solvent was removed under reduced pressure. The residue was purified *via* flash chromatography on silica gel (PE/EtOAc = 3/1) to give **11** (46 mg, 66%) as a yellow solid.

To a solution of **11** (30 mg, 0.1 mmol) and DMAP (3 mg, 0.02 mmol) in DCM (1 mL), was added triethylamine (21  $\mu$ L, 0.15 mmol) slowly at 0 °C. Then methyl chlorooxalate (14  $\mu$ L, 0.15 mmol) was added dropwise, and the mixture was stirred at room temperature for 1 h. The resulting solution was washed with water, dried over anhydrous Na<sub>2</sub>SO<sub>4</sub>, and concentrated to give yellow oil, which was used in the next step without further purification. To a solution of the crude product in degassed toluene (1.4 mL) was added AIBN (8 mg, 0.05 mmol) and *n*-Bu<sub>3</sub>SnH (67  $\mu$ L, 0.23 mmol). The solution was heated to 110 °C in an oil bath under nitrogen and stirred for 2 h. Then the resulting mixture was cooled to room temperature and evaporated. The residue was purified *via* flash chromatography (10% w/w anhydrous K<sub>2</sub>CO<sub>3</sub>-silica<sup>2</sup>; PE/EA = 3/1) to give **9** (14 mg, 47%, 55% brsm) as yellow oil and recovered **11** (5 mg, 15%).

**(5*S*,9*R*)-9-hydroxy-9-(3-methoxyphenyl)-1,7-dimethyl-1,7-diazaspiro[4.4]nonane-6,8-dione (11)**

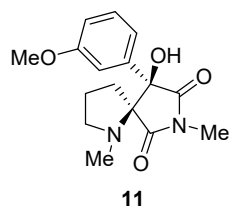

[ $\alpha$ ]25 D -49.85 ( $c = 1.00$ ,  $\text{CDCl}_3$ );  $^1\text{H NMR}$  (600 MHz,  $\text{CDCl}_3$ )  $\delta$  7.24 (t,  $J = 7.8$  Hz, 1H), 7.00 (s, 1H), 6.83 (dd,  $J = 7.8, 1.8$  Hz, 1H), 6.70 (d,  $J = 7.8$  Hz, 1H), 5.76 (br s, 1H), 3.80 (s, 3H), 3.25-3.21 (m, 1H), 3.17 (s, 3H), 2.80-2.75 (m, 1H), 2.34 (s, 3H), 2.19-2.12 (m, 1H), 1.78-1.73 (m, 1H), 1.58-1.50 (m, 1H), 1.45-1.39 (m, 1H);  $^{13}\text{C NMR}$  (150 MHz,  $\text{CDCl}_3$ )  $\delta$  177.7, 176.4, 160.0, 140.9, 129.8, 116.9, 113.5, 111.1, 77.3, 74.9, 56.8, 55.3, 36.8, 30.9, 24.7, 23.5; **IR** (thin film): 2953, 1782, 1712, 1583, 1487, 1456, 1429, 1377, 1288, 1261, 1172, 1047, 792  $\text{cm}^{-1}$  **LRMS** (ESI): 305 ( $\text{M}+\text{H}$ )<sup>+</sup>; **HRMS** (ESI): calcd for  $\text{C}_{16}\text{H}_{21}\text{N}_2\text{O}_4$  ( $\text{M}+\text{H}$ )<sup>+</sup>: 305.1496, found: 305.1497; mp: 95-97 °C

## Preparation of Ketoamides 4a-f

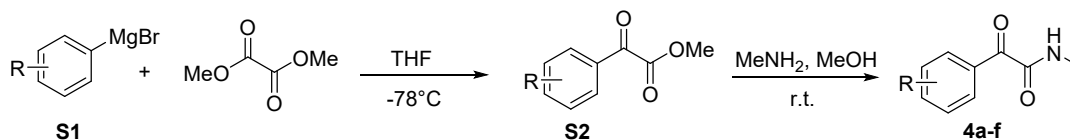

To a solution of dimethyl oxalate (2.6 g, 22 mmol) was added Grignard reagent **S1** (1.0 M solution in THF, 20 ml, 20 mmol) dropwise at  $-78$  °C. After stirring at  $-78$  °C for 2.5 h, the mixture was quenched with aq. HCl (2 M, 6 mL), warmed to room temperature, and concentrated to remove THF. The residue was extracted with  $\text{CH}_2\text{Cl}_2$  for three times. The combined organic layers were dried over anhydrous  $\text{Na}_2\text{SO}_4$  and concentrated to give yellow liquid, which was used in the next step without further purification.

To a solution of the crude product in MeOH (40 mL) was added  $\text{MeNH}_2$  (27% in MeOH, 3.7 mL, ca. 26 mmol), and the mixture was stirred for 24-72 h until TLC control indicated the completed consumption of the substrate. Then the solvent was removed under reduced pressure and the residual was subjected to flash chromatography on silica gel (PE/EtOAc = 5/1) to give corresponding ketoamides **4a-f**.

### 2-(3-methoxyphenyl)-*N*-methyl-2-oxoacetamide (**4a**)

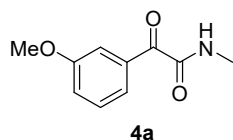

**4a**: Yellow solid (63% yield);  $^1\text{H NMR}$  (600 MHz,  $\text{CDCl}_3$ )  $\delta$  7.99 (d,  $J = 7.8$  Hz, 1H), 7.85 (s, 1H), 7.39 (t,  $J = 7.8$  Hz, 1H), 7.18 (dd,

$J = 7.8, 2.4$  Hz, 1H), 7.11 (br s, 1H), 3.87 (s, 3H), 2.98 (d,  $J = 5.1$  Hz, 3H);  $^{13}\text{C}$  NMR (150 MHz,  $\text{CDCl}_3$ )  $\delta$  187.4, 162.4, 159.5, 134.5, 129.6, 124.2, 121.6, 114.6, 55.5, 26.1; **IR** (thin film): 3320, 2950, 1664, 1286, 1255, 1197, 1039, 779  $\text{cm}^{-1}$ ; **LRMS** (ESI): 194 (M+H) $^+$ ; **HRMS** (ESI): calcd for  $\text{C}_{10}\text{H}_{12}\text{NO}_3$ (M+H) $^+$ : 194.0812, found: 194.0814; mp: 30-32  $^\circ\text{C}$

#### ***N*-methyl-2-oxo-2-(*p*-tolyl)acetamide (4b)**

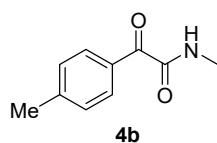

**4b**: White solid (70% yield);  $^1\text{H}$  NMR (600 MHz,  $\text{CDCl}_3$ ):  $\delta$  8.27 (d,  $J = 7.8$  Hz, 2H), 7.28 (d,  $J = 7.8$  Hz, 2H), 7.12 (br s, 1H), 2.98-2.95 (m, 3H), 2.43 (s, 3H);  $^{13}\text{C}$  NMR (150 MHz,  $\text{CDCl}_3$ ):  $\delta$  187.2, 162.7, 145.6, 131.4, 130.8, 129.3, 26.0, 21.9; **IR** (thin film): 3251, 3101, 1670, 1653, 1635, 1575, 1558, 1541, 1417, 759  $\text{cm}^{-1}$ ; **LRMS** (ESI): 200 (M+Na) $^+$ ; **HRMS** (ESI):  $m/z$  calcd for  $\text{C}_{10}\text{H}_{11}\text{NO}_2\text{Na}$ (M+Na) $^+$ : 200.0682, found: 200.0684; mp: 72-74  $^\circ\text{C}$

#### **2-(4-methoxyphenyl)-*N*-methyl-2-oxoacetamide (4c)**

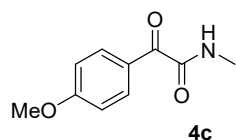

**4c**: Yellow solid (37% yield);  $^1\text{H}$  NMR (600 MHz,  $\text{CDCl}_3$ )  $\delta$  8.43 (d,  $J = 7.8$  Hz, 2H), 7.15 (br s, 1H), 6.95 (d,  $J = 7.8$  Hz, 2H), 3.89 (s, 3H), 2.98-2.95 (m, 3H);  $^{13}\text{C}$  NMR (150 MHz,  $\text{CDCl}_3$ )  $\delta$  185.6, 164.7, 162.9, 134.0, 126.4, 113.8, 55.6, 26.0; **IR** (thin film): 3381, 1683, 1647, 1598, 1533, 1301, 1261, 1172, 1068, 1022, 846, 802, 534  $\text{cm}^{-1}$ ; **LRMS** (ESI): 216 (M+Na) $^+$ ; **HRMS** (ESI):  $m/z$  calcd for  $\text{C}_{10}\text{H}_{11}\text{NO}_3\text{Na}$ (M+Na) $^+$ : 216.0631, found: 216.0636; mp: 95-97  $^\circ\text{C}$

#### **2-(4-(*tert*-butyl)phenyl)-*N*-methyl-2-oxoacetamide (4d)**

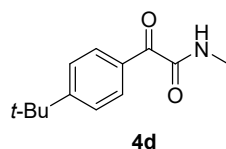

**4d**: White solid (43% yield);  $^1\text{H}$  NMR (600 MHz,  $\text{CDCl}_3$ )  $\delta$  8.29 (d,  $J = 7.2$  Hz, 2H), 7.50 (d,  $J = 7.2$  Hz, 2H), 7.13 (br s, 1H), 2.99-2.96 (m, 3H), 1.34 (s, 9H);  $^{13}\text{C}$  NMR (150 MHz,  $\text{CDCl}_3$ )  $\delta$  187.2, 162.7, 158.4, 131.2, 130.7, 125.5, 35.3, 31.0, 26.0; **IR** (thin film): 3325, 2962, 1662, 1602, 1527, 1409, 1292, 1224, 1188, 1111, 935  $\text{cm}^{-1}$ ; **LRMS** (ESI): 220 (M+H) $^+$ ; **HRMS** (ESI):  $m/z$  calcd for  $\text{C}_{13}\text{H}_{18}\text{NO}_2$ (M+H) $^+$ : 220.1332, found: 220.1338; mp: 60-

62 °C

***N*-methyl-2-oxo-2-(*m*-tolyl)acetamide (4e)**

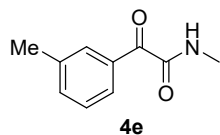

**4e:** White solid (57% yield); **<sup>1</sup>H NMR** (600 MHz, CDCl<sub>3</sub>): δ 8.16-8.11 (m, 2H), 7.46-7.42 (m, 1H), 7.39-7.35 (m, 1H), 7.11 (br s, 1H), 3.00-2.95 (m, 3H), 2.42 (s, 3H); **<sup>13</sup>C NMR** (150 MHz, CDCl<sub>3</sub>): δ 187.9, 162.6, 138.3, 135.3, 133.3, 131.5, 128.4, 128.4, 26.0, 21.3; **IR** (thin film): 3307, 2922, 1662, 1558, 1411, 1303, 1244, 1174, 775, 669 cm<sup>-1</sup>; **LRMS** (ESI): 200 (M+Na)<sup>+</sup>; **HRMS** (ESI): m/z calcd for C<sub>10</sub>H<sub>11</sub>NO<sub>2</sub>Na (M+Na)<sup>+</sup>: 200.0682, found: 200.0686; mp: 47-49 °C

**2-(3-fluorophenyl)-*N*-methyl-2-oxoacetamide (4f)**

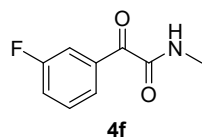

**4f:** White solid (45% yield); **<sup>1</sup>H NMR** (600 MHz, CDCl<sub>3</sub>): δ 8.19 (d, *J* = 7.2 Hz, 1H), 8.08 (d, *J* = 9.6 Hz, 1H), 7.50-7.44 (m, 1H), 7.37-7.31 (m, 1H), 7.13 (br s, 1H), 3.01-2.96 (m, 3H); **<sup>13</sup>C NMR** (150 MHz, CDCl<sub>3</sub>): δ 186.3 (d, *J* = 1.5 Hz), 162.4 (d, *J* = 247.5 Hz), 161.8, 135.1 (d, *J* = 7.5 Hz), 130.2 (d, *J* = 7.5 Hz), 127.2 (d, *J* = 3.0 Hz), 121.5 (d, *J* = 21.0 Hz), 117.9 (d, *J* = 22.5 Hz), 26.1; **IR** (thin film): 3372, 1668, 1541, 1436, 1411, 1305, 1240, 1168, 777, 686 cm<sup>-1</sup>; **LRMS** (ESI): 182 (M+H)<sup>+</sup>; **HRMS** (ESI): m/z calcd for C<sub>9</sub>H<sub>9</sub>FNO<sub>2</sub> (M+H)<sup>+</sup>: 182.0612, found: 182.0613; mp: 57-59 °C

## Substrate Scope of Aldol Addition/Transamidification

### Transamidification of 7a to Obtain Spirocyclic Product

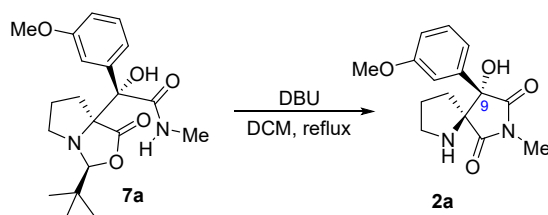

To a solution of **7a** (38 mg, 0.1 mmol) in DCM (2 mL) was added DBU (15  $\mu$ L, 0.1 mmol) at 45  $^{\circ}$ C. After stirring at the same temperature for 30 h, the mixture was quenched with a saturated solution of  $\text{NH}_4\text{Cl}$ , extracted with DCM for 3 times, dried over anhydrous  $\text{Na}_2\text{SO}_4$  and concentrated. The residual was subjected to flash chromatography on silica gel (PE/EtOAc = 1/1) to give **2a** in 65% yield (19 mg).

### The Substrate Scope of 3 and 4

#### Procedure for Reaction of 3a and Ketoamides 4a-d

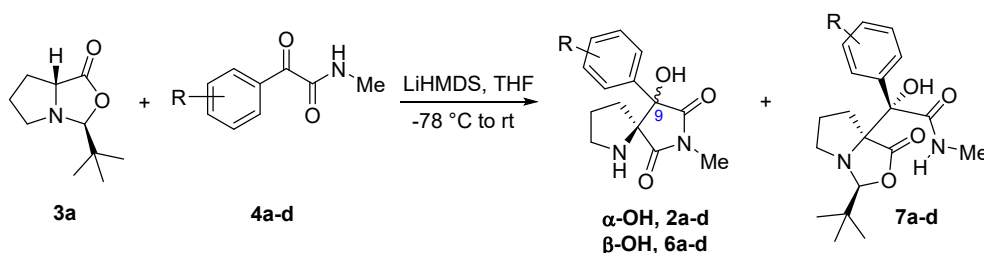

In a 100 ml flask, LiHMDS (1.0 M solution in THF, 3 ml, 3 mmol) was added to THF (20 ml). After the solution cooled down to  $-78^{\circ}\text{C}$ , the crude product of **3a** (367 mg, 2 mmol) in THF (20 ml) was added dropwise over 5 min and the mixture was stirred at the temperature for 1.5 h. After ketoamide **4** (1 mmol) in THF (10 ml) was added dropwise over 20 min, the mixture was stirred at the temperature for 2.5 h. Then the mixture was gradually warmed to room temperature for a period over 1.5 h and stirred for another 2 h. After a saturated solution of  $\text{NH}_4\text{Cl}$  was added, THF was removed under reduced pressure. The residue was extracted with DCM for 3 times, dried over anhydrous  $\text{Na}_2\text{SO}_4$ , concentrated, and purified *via* flash chromatography on silica gel (PE/EtOAc = 1/1) to give **2**, **6** and **7**.

**(5S,9S)-9-hydroxy-7-methyl-9-(p-tolyl)-1,7-diazaspiro[4.4]nonane-6,8-dione (2b)**

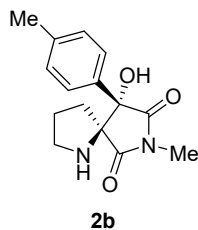

**2b:** Yellow oil (48% yield) [ $\alpha$ ]25 D -23.28 (c = 1.00, MeOH);  $^1\text{H}$  NMR (600 MHz,  $\text{CDCl}_3$ )  $\delta$  7.17-7.08 (m, 4H), 3.75 (br s, 1H), 3.13 (s, 3H), 3.05-3.00 (m, 1H), 2.85-2.80 (m, 1H), 2.54-2.49 (m, 1H), 2.33 (s, 3H), 1.95-1.84 (m, 3H);  $^{13}\text{C}$  NMR (150 MHz,  $\text{CDCl}_3$ )  $\delta$  180.2, 177.8, 138.6, 135.1, 129.5, 125.3, 81.9, 74.1, 47.1, 32.9, 25.4, 25.1,

21.1; **IR** (thin film): 3419, 2949, 1707, 1435, 1379, 1292, 1062, 815  $\text{cm}^{-1}$ ; **LRMS** (ESI): 275 (M+H) $^+$ ; **HRMS** (ESI): calcd for  $\text{C}_{15}\text{H}_{19}\text{N}_2\text{O}_3$  (M+H) $^+$ : 275.1390, found: 275.1393.

**(5S,9S)-9-hydroxy-9-(4-methoxyphenyl)-7-methyl-1,7-diazaspiro[4.4]nonane-6,8-dione (2c)**

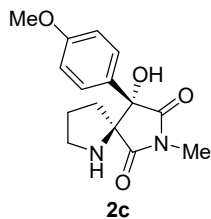

**2c:** Orange oil (39% yield) [ $\alpha$ ]25 D -22.28 (c = 1.00, MeOH);  $^1\text{H}$  NMR (600 MHz,  $\text{CDCl}_3$ )  $\delta$  7.18 (d,  $J$  = 9.0 Hz, 2H), 6.86 (d,  $J$  = 9.0 Hz, 2H), 3.79 (s, 3H), 3.13 (s, 3H), 3.05-3.00 (m, 1H), 2.86-2.77 (m, 1H), 2.54-2.47 (m, 1H), 1.96-1.82 (m, 3H);  $^{13}\text{C}$  NMR (150 MHz,  $\text{CDCl}_3$ )  $\delta$  180.1, 178.0, 159.8, 129.9, 126.9, 114.1, 81.6, 74.1, 55.3, 47.2, 32.6, 25.5,

25.1; **IR** (thin film): 3358, 2922, 1707, 1512, 1436, 1296, 1251, 1178, 1062, 831  $\text{cm}^{-1}$ ; **LRMS** (ESI): 291 (M+H) $^+$ ; **HRMS** (ESI): calcd for  $\text{C}_{15}\text{H}_{19}\text{N}_2\text{O}_4$  (M+H) $^+$ : 291.1339, found: 291.1342.

**(5S,9S)-9-(4-(tert-butyl)phenyl)-9-hydroxy-7-methyl-1,7-diazaspiro[4.4]nonane-6,8-dione (2d)**

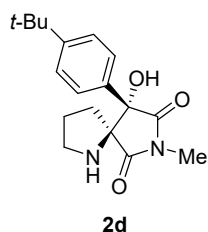

**2d:** Yellow oil (35% yield) [ $\alpha$ ]25 D -9.90 (c = 1.05, MeOH);  $^1\text{H}$  NMR (600 MHz,  $\text{CDCl}_3$ )  $\delta$  7.38 (d,  $J$  = 8.4 Hz, 2H), 7.19 (d,  $J$  = 8.4 Hz, 2H), 3.15 (s, 3H), 3.10-3.05 (m, 1H), 2.92-2.87 (m, 1H), 2.57-2.50 (m, 1H), 1.98-1.93 (m, 1H), 1.93-1.85 (m, 2H), 1.29 (s, 9H);  $^{13}\text{C}$  NMR (150 MHz,  $\text{CDCl}_3$ )  $\delta$  180.2, 177.7, 151.8, 135.0, 125.8, 125.1,

81.9, 74.1, 47.2, 34.6, 33.1, 31.2, 25.3, 25.1; **IR** (thin film): 3412, 2960, 1707, 1433, 1381, 1282, 1062, 833, 559  $\text{cm}^{-1}$ ; **LRMS** (ESI): 317 (M+H) $^+$ ; **HRMS** (ESI): calcd for  $\text{C}_{18}\text{H}_{25}\text{N}_2\text{O}_3$  (M+H) $^+$ : 317.1860, found: 317.1873.



## Procedure for Reaction of **3b** and Ketoamides **4a-f**

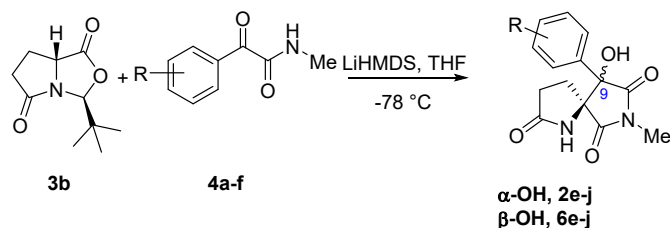

The acetal derived **3b** was prepared according to the literature<sup>4</sup>. In a 100 ml flask, LiHMDS (1.0 M solution in THF, 3 ml, 3 mmol) was added to THF (20 ml). After the solution cooled down to -78 °C, **3b** (394 mg, 2 mmol) in THF (20 ml) was added dropwise over 20 min and the mixture was stirred at the temperature for 2 h. Ketoamide **4** (1 mmol) in THF (10 ml) was added dropwise over 15 min and the mixture was stirred at the temperature for 14 h. After a saturated solution of  $\text{NH}_4\text{Cl}$  was added, the mixture was allowed to warm to room temperature, followed by removal of THF under reduced pressure. The residue was extracted with DCM for 3 times, dried over anhydrous  $\text{Na}_2\text{SO}_4$ , concentrated, and purified *via* flash chromatography on silica gel (PE/EtOAc = 1/1) to give **2** and its epimer **6** at C9.

### (5*S*,9*S*)-9-hydroxy-9-(3-methoxyphenyl)-7-methyl-1,7-diazaspiro[4.4]nonane-2,6,8-trione (**2e**)

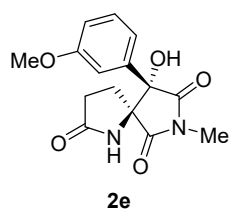

**2e**: White solid (39% yield)  $[\alpha]_{25}^D +79.01$  ( $c = 0.97$ , MeOH);  $^1\text{H NMR}$  (600 MHz,  $\text{CDCl}_3$ )  $\delta$  7.24 (t,  $J = 7.8$  Hz, 1H), 6.86 (d,  $J = 7.8$  Hz, 1H), 6.78 (s, 1H), 6.62 (d,  $J = 7.8$  Hz, 1H), 5.31 (s, 1H), 4.26 (s, 1H), 3.77 (s, 3H), 3.19 (s, 3H), 2.94-2.86 (m, 1H), 2.56-2.42 (m, 2H), 2.13-2.07 (m, 1H);  $^{13}\text{C NMR}$  (150 MHz,  $\text{CDCl}_3$ )  $\delta$  177.6, 176.3, 176.1, 160.4, 138.7, 130.7, 116.4, 114.5, 111.3, 80.5, 70.6, 55.4, 29.5, 28.3, 25.3; **IR** (thin film): 3305, 1708, 1600, 1490, 1431, 1290, 1259, 1047, 732  $\text{cm}^{-1}$ ; **LRMS** (ESI): 305 (M+H)<sup>+</sup>; **HRMS** (ESI): calcd for  $\text{C}_{15}\text{H}_{17}\text{N}_2\text{O}_5$  (M+H)<sup>+</sup>: 305.1132, found: 305.1136; mp: 195-197 °C

**(5*S*,9*R*)-9-hydroxy-9-(3-methoxyphenyl)-7-methyl-1,7-diazaspiro[4.4]nonane-2,6,8-trione (6e)**

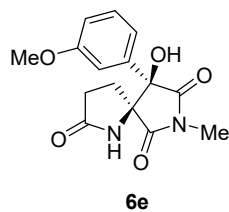

**6e:** White solid (11% yield) [ $\alpha$ ]<sub>25</sub> D -20.20 (c = 0.50, CHCl<sub>3</sub>); <sup>1</sup>H NMR (600 MHz, CDCl<sub>3</sub>)  $\delta$  7.30 (t, *J* = 7.8 Hz, 1H), 6.96 (s, 1H), 6.93-6.89 (m, 2H), 6.88 (br s, 1H), 5.16 (s, 1H), 3.79 (s, 3H), 3.13 (s, 3H), 2.35-2.26 (m, 1H), 2.05-1.97 (m, 1H), 1.76-1.62 (m, 2H); <sup>13</sup>C NMR (150 MHz, CDCl<sub>3</sub>)  $\delta$  178.2, 176.7, 175.4, 159.8, 136.4, 130.0, 118.6, 114.8, 112.3, 79.0, 69.3, 55.4, 29.0, 28.5, 25.5; IR (thin film): 3311, 2926, 1708, 1381, 1292, 1269, 1120, 1016, 794, 736 cm<sup>-1</sup>; LRMS (ESI): 305 (M+H)<sup>+</sup>; HRMS (ESI): calcd for C<sub>15</sub>H<sub>17</sub>N<sub>2</sub>O<sub>5</sub> (M+H)<sup>+</sup>: 305.1132, found: 305.1135. mp: 219-221 °C

**(5*S*,9*S*)-9-hydroxy-7-methyl-9-(*p*-tolyl)-1,7-diazaspiro[4.4]nonane-2,6,8-trione (2f)**

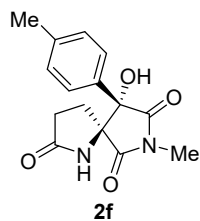

**2f:** White solid (54% yield) [ $\alpha$ ]<sub>25</sub> D +48.18 (c = 1.00, MeOH); <sup>1</sup>H NMR (600 MHz, CDCl<sub>3</sub>)  $\delta$  7.12 (d, *J* = 8.4 Hz, 2H), 7.00 (d, *J* = 8.4 Hz, 2H), 5.36 (s, 1H), 4.33 (s, 1H), 3.17 (s, 3H), 2.91-2.84 (m, 1H), 2.54-2.40 (m, 2H), 2.32 (s, 3H), 2.12-2.06 (m, 1H); <sup>13</sup>C NMR (150 MHz, CDCl<sub>3</sub>)  $\delta$  177.7, 176.4, 176.4, 139.4, 134.1, 130.1, 124.8, 80.6, 70.6, 29.5, 28.2, 25.2, 21.1; IR (thin film): 3219, 2924, 1707, 1431, 1375, 1296, 1053, 732 cm<sup>-1</sup>; LRMS (ESI): 289 (M+H)<sup>+</sup>; HRMS (ESI): calcd for C<sub>15</sub>H<sub>17</sub>N<sub>2</sub>O<sub>4</sub> (M+H)<sup>+</sup>: 289.1183, found: 289.1185; mp: 173-175 °C

**(5*S*,9*R*)-9-hydroxy-7-methyl-9-(*p*-tolyl)-1,7-diazaspiro[4.4]nonane-2,6,8-trione (6f)**

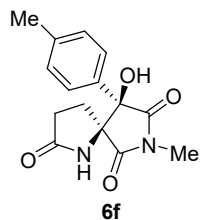

**6f:** White solid (16% yield) [ $\alpha$ ]<sub>25</sub> D -12.18 (c = 1.00, CHCl<sub>3</sub>); <sup>1</sup>H NMR (600 MHz, CDCl<sub>3</sub>)  $\delta$  7.27 (d, *J* = 7.8 Hz, 2H), 7.20 (d, *J* = 7.8 Hz, 2H), 6.72 (s, 1H), 4.89 (s, 1H), 3.14 (s, 3H), 2.36 (s, 3H), 2.30-2.22 (m, 1H), 2.03-1.95 (m, 1H), 1.69-1.59 (m, 2H); <sup>13</sup>C NMR (150 MHz, CDCl<sub>3</sub>)  $\delta$  178.1, 176.8, 175.5, 139.5, 131.7, 129.5, 126.4, 79.0, 69.3, 28.9, 28.7, 25.4, 21.2; IR (thin film): 3331, 2924, 1712, 1435, 1381, 1298, 1045, 867, 734, 430 cm<sup>-1</sup>; LRMS (ESI): 289 (M+H)<sup>+</sup>; HRMS (ESI): calcd for C<sub>15</sub>H<sub>17</sub>N<sub>2</sub>O<sub>4</sub> (M+H)<sup>+</sup>: 289.1183, found: 289.1186; mp: 226-228 °C

**(5*S*,9*S*)-9-hydroxy-7-methyl-9-(*m*-tolyl)-1,7-diazaspiro[4.4]nonane-2,6,8-trione**

**(2g)**

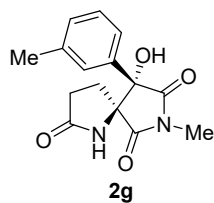

**2g:** White solid (49% yield) [ $\alpha$ ]<sub>25</sub> D -0.38 (c = 1.00, CHCl<sub>3</sub>); <sup>1</sup>H

**NMR** (600 MHz, CDCl<sub>3</sub>)  $\delta$  7.28-7.24 (m, 1H), 7.18 (d, *J* = 7.8 Hz, 1H), 7.00 (s, 1H), 6.93 (d, *J* = 7.8 Hz, 1H), 5.04 (s, 1H), 3.66 (s, 1H), 3.23 (s, 3H), 2.96-2.89 (m, 1H), 2.58-2.47 (m, 2H), 2.34 (s, 3H),

2.15-2.09 (m, 1H); <sup>13</sup>C **NMR** (150 MHz, CDCl<sub>3</sub>)  $\delta$  177.3, 176.4, 176.2, 139.7, 137.1, 130.4, 129.5, 125.4, 121.7, 80.5, 70.4, 29.5, 28.3, 25.4, 21.7; **IR** (thin film): 3250, 2924, 1712, 1435, 1379, 1294, 1055, 802, 732 cm<sup>-1</sup>; **LRMS** (ESI): 289 (M+H)<sup>+</sup>; **HRMS** (ESI): calcd for C<sub>15</sub>H<sub>17</sub>N<sub>2</sub>O<sub>4</sub>(M+H)<sup>+</sup>: 289.1183, found: 289.1185; mp: 233-235 °C

**(5*S*,9*R*)-9-hydroxy-7-methyl-9-(*m*-tolyl)-1,7-diazaspiro[4.4]nonane-2,6,8-trione**

**(6g)**

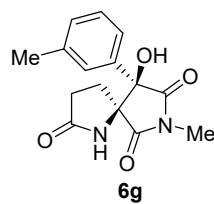

**6g:** White solid (15% yield) [ $\alpha$ ]<sub>25</sub> D -18.93 (c = 1.10, CHCl<sub>3</sub>); <sup>1</sup>H

**NMR** (600 MHz, CDCl<sub>3</sub>)  $\delta$  7.29-7.25 (m, 1H), 7.20-7.18 (m, 2H), 7.15 (d, *J* = 7.8 Hz, 1H), 6.94 (s, 1H), 5.36 (s, 1H), 3.13 (s, 3H), 2.35 (s, 3H), 2.31-2.24 (m, 1H), 2.01-1.95 (m, 1H), 1.70-1.58 (m, 2H);

<sup>13</sup>C **NMR** (150 MHz, CDCl<sub>3</sub>)  $\delta$  178.4, 176.8, 175.6, 138.6, 134.9, 130.1, 128.7, 127.0, 123.5, 79.1, 69.4, 29.0, 28.5, 25.4, 21.6; **IR** (thin film): 3309, 2924, 1707, 1431, 1379, 1120, 1020, 798, 734 cm<sup>-1</sup>; **LRMS** (ESI): 289 (M+H)<sup>+</sup>; **HRMS** (ESI): calcd for C<sub>15</sub>H<sub>17</sub>N<sub>2</sub>O<sub>4</sub>(M+H)<sup>+</sup>: 289.1183, found: 289.1184; mp: 219-221 °C

**(5*S*,9*S*)-9-(3-fluorophenyl)-9-hydroxy-7-methyl-1,7-diazaspiro[4.4]nonane-2,6,8-trione (2h)**

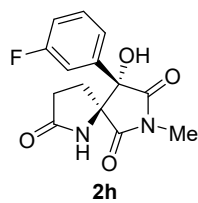

**2h:** White solid (34% yield) [ $\alpha$ ]<sub>25</sub> D +66.98 (c = 1.00, MeOH); <sup>1</sup>H

**NMR** (600 MHz, CDCl<sub>3</sub>)  $\delta$  7.38-7.33 (m, 1H), 7.08 (t, *J* = 7.8, 1H), 7.00-6.96 (m, 1H), 6.90 (d, *J* = 7.8 Hz, 1H), 5.25 (s, 1H), 3.97 (s, 1H), 3.23 (s, 3H), 2.95-2.88 (m, 1H), 2.58-2.45 (m, 2H), 2.17-2.10 (m, 1H);

<sup>13</sup>C **NMR** (150 MHz, CDCl<sub>3</sub>)  $\delta$  177.3, 176.0, 175.6, 163.3 (d, *J* = 250.0 Hz), 139.7 (d, *J* = 6.0 Hz), 131.4 (d, *J* = 9.0 Hz), 120.2 (d, *J* = 3.0 Hz), 116.7 (d, *J* = 21.0 Hz), 112.8

(d,  $J = 24.0$  Hz), 80.4, 70.5, 29.3, 28.4, 25.5; **IR** (thin film): 3207, 2924, 1708, 1435, 1379, 1296, 1053, 732  $\text{cm}^{-1}$ ; **LRMS** (ESI): 293 ( $\text{M}+\text{H}$ )<sup>+</sup>; **HRMS** (ESI): calcd for  $\text{C}_{14}\text{H}_{14}\text{FN}_2\text{O}_4$  ( $\text{M}+\text{H}$ )<sup>+</sup>: 293.0932, found: 293.0938; mp: 187-189 °C

**(5*S*,9*R*)-9-(3-fluorophenyl)-9-hydroxy-7-methyl-1,7-diazaspiro[4.4]nonane-2,6,8-trione (6h)**

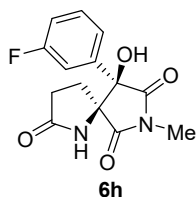

**6h**: White solid (15% yield) [ $\alpha$ ]<sub>25</sub> D -13.67 ( $c = 0.60$ , MeOH); **<sup>1</sup>H NMR** (600 MHz,  $\text{CD}_3\text{OD}$ )  $\delta$  7.47-7.42 (m, 1H), 7.31-7.25 (m, 2H), 7.18-7.13 (m, 1H), 3.11 (s, 3H), 2.22 (ddd,  $J = 16.8, 9.8, 5.5$  Hz, 1H), 2.06 (ddd,  $J = 13.4, 9.8, 6.5$  Hz, 1H), 1.70 (ddd,  $J = 13.4, 9.6, 5.6$  Hz, 1H), 1.59 (ddd,  $J = 16.3, 9.6, 6.5$  Hz, 1H); **<sup>13</sup>C NMR** (150 MHz,  $\text{CD}_3\text{OD}$ )  $\delta$  179.3, 177.1, 174.9, 162.6 ( $d, J = 245.4$  Hz), 138.6 ( $d, J = 7.1$  Hz), 129.9 ( $d, J = 8.1$  Hz), 122.8 ( $d, J = 2.9$  Hz), 115.3 ( $d, J = 21.3$  Hz), 114.0 ( $d, J = 23.5$  Hz), 78.3, 70.1, 28.7, 28.1, 24.0; **IR** (thin film): 3323, 2924, 1712, 1589, 1381, 1301, 1269, 1118, 1049, 1018, 738  $\text{cm}^{-1}$ ; **LRMS** (ESI): 293 ( $\text{M}+\text{H}$ )<sup>+</sup>; **HRMS** (ESI): calcd for  $\text{C}_{14}\text{H}_{14}\text{FN}_2\text{O}_4$  ( $\text{M}+\text{H}$ )<sup>+</sup>: 293.0932, found: 293.0935; mp: 206-208 °C

**(5*S*,9*S*)-9-(4-(*tert*-butyl)phenyl)-9-hydroxy-7-methyl-1,7-diazaspiro[4.4]nonane-2,6,8-trione (2i)**

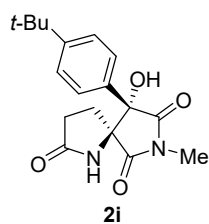

**2i**: White solid (54% yield) [ $\alpha$ ]<sub>25</sub> D +21.98 ( $c = 1.00$ , MeOH); **<sup>1</sup>H NMR** (600 MHz,  $\text{CDCl}_3$ )  $\delta$  7.38 (d,  $J = 7.8$  Hz, 2H), 7.09 (d,  $J = 7.8$  Hz, 2H), 5.22 (s, 1H), 3.97 (s, 1H), 3.19 (s, 3H), 2.94-2.86 (m, 1H), 2.57-2.43 (m, 2H), 2.15-2.07 (m, 1H), 1.29 (s, 9H); **<sup>13</sup>C NMR** (150 MHz,  $\text{CDCl}_3$ )  $\delta$  177.6, 176.3, 176.2, 152.8, 134.0, 126.5, 124.6, 80.6, 70.5, 34.7, 31.2, 29.5, 28.3, 25.3; **IR** (thin film): 2960, 1712, 1435, 1381, 1286, 1103, 1053, 734  $\text{cm}^{-1}$ ; **LRMS** (ESI): 331 ( $\text{M}+\text{H}$ )<sup>+</sup>; **HRMS** (ESI): calcd for  $\text{C}_{18}\text{H}_{23}\text{N}_2\text{O}_4$  ( $\text{M}+\text{H}$ )<sup>+</sup>: 331.1652, found: 331.1651; mp: 244-246 °C

**(5*S*,9*R*)-9-(4-(*tert*-butyl)phenyl)-9-hydroxy-7-methyl-1,7-diazaspiro[4.4]nonane-2,6,8-trione (6i)**

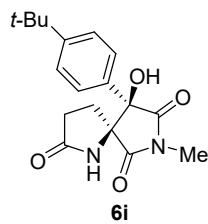

**6i:** White solid (18% yield) [ $\alpha$ ]25 D -2.20 (c = 0.20, CHCl<sub>3</sub>); **<sup>1</sup>H NMR** (600 MHz, CDCl<sub>3</sub>)  $\delta$  7.44 (d,  $J$  = 7.8 Hz, 2H), 7.34 (d,  $J$  = 7.8 Hz, 2H), 6.43 (s, 1H), 3.91 (s, 1H), 3.17 (s, 3H), 2.33-2.25 (m, 1H), 2.06-1.98 (m, 1H), 1.71-1.63 (m, 2H), 1.32 (s, 9H); **<sup>13</sup>C NMR** (150 MHz, CDCl<sub>3</sub>)  $\delta$  177.6, 176.8, 175.2, 153.0, 131.2, 126.3, 125.9, 79.0, 69.0, 34.8, 31.2, 29.1, 28.8, 25.5; **IR** (thin film): 3257, 2960, 1793, 1712, 1431, 1291, 1020, 800, 580 cm<sup>-1</sup>; **LRMS** (ESI): 331 (M+H)<sup>+</sup>; **HRMS** (ESI): calcd for C<sub>18</sub>H<sub>23</sub>N<sub>2</sub>O<sub>4</sub> (M+H)<sup>+</sup>: 331.1652, found: 331.1652; mp: 260-262 °C

**(5S,9S)-9-hydroxy-9-(4-methoxyphenyl)-7-methyl-1,7-diazaspiro[4.4]nonane-2,6,8-trione (2j)**

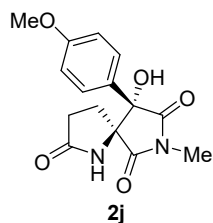

**2j:** White solid (31% yield) [ $\alpha$ ]25 D -17.92 (c = 0.25, CHCl<sub>3</sub>); **<sup>1</sup>H NMR** (600 MHz, CDCl<sub>3</sub>)  $\delta$  7.10 (d,  $J$  = 8.9 Hz, 2H), 6.90 (d,  $J$  = 8.9 Hz, 2H), 5.03 (s, 1H), 3.81 (s, 3H), 3.54 (s, 1H), 3.22 (s, 3H), 2.95-2.88 (m, 1H), 2.59-2.47 (m, 2H), 2.16-2.10 (m, 1H); **<sup>13</sup>C NMR** (150 MHz, CDCl<sub>3</sub>)  $\delta$  177.2, 176.3, 176.3, 160.4, 128.9, 126.3, 114.9, 80.4, 70.5, 55.4, 29.5, 28.3, 25.3; **IR** (thin film): 3290, 2924, 1705, 1508, 1292, 1251, 1180, 1053, 732 cm<sup>-1</sup>; **LRMS** (ESI): 305 (M+H)<sup>+</sup>; **HRMS** (ESI): calcd for C<sub>15</sub>H<sub>17</sub>N<sub>2</sub>O<sub>5</sub> (M+H)<sup>+</sup>: 305.1132, found: 305.1139; mp: 220-222 °C

**(5S,9R)-9-hydroxy-9-(4-methoxyphenyl)-7-methyl-1,7-diazaspiro[4.4]nonane-2,6,8-trione (6j)**

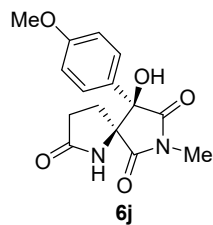

**6j:** Yellow oil (11% yield) [ $\alpha$ ]25 D -13.25 (c = 0.40, CHCl<sub>3</sub>); **<sup>1</sup>H NMR** (600 MHz, CDCl<sub>3</sub>)  $\delta$  7.34 (d,  $J$  = 8.4 Hz, 2H), 6.93 (d,  $J$  = 8.4 Hz, 2H), 6.47 (s, 1H), 4.30 (br s, 1H), 3.83 (s, 3H), 3.16 (s, 3H), 2.32-2.24 (m, 1H), 2.04-1.97 (m, 1H), 1.71-1.62 (m, 2H); **<sup>13</sup>C NMR** (150 MHz, CDCl<sub>3</sub>)  $\delta$  177.7, 176.7, 175.4, 160.4, 128.0, 126.2, 114.3, 78.8, 69.1, 55.4, 29.1, 28.8, 25.5; **IR** (thin film): 3365, 2926, 1707, 1514, 1436, 1255, 1180, 1016, 802 cm<sup>-1</sup>; **LRMS** (ESI): 305 (M+H)<sup>+</sup>; **HRMS** (ESI): calcd for C<sub>15</sub>H<sub>17</sub>N<sub>2</sub>O<sub>5</sub> (M+H)<sup>+</sup>: 305.1132, found: 305.1140

### 3. Comparison of NMR Data of Synthetic and Natural

#### amathaspiramide A

**Table 3 Comparison of <sup>1</sup>H NMR Data of Synthetic and Natural**

#### **Amathaspiramide A**

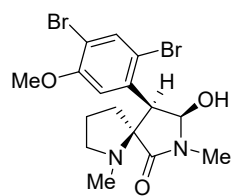

**amathaspiramide A**

|    | <b>Synthetic</b><br><b>(600 MHz, CDCl<sub>3</sub>)</b> |                          | <b>Natural</b><br><b>(300 MHz, CDCl<sub>3</sub>)</b> |                          |
|----|--------------------------------------------------------|--------------------------|------------------------------------------------------|--------------------------|
| 1  | 7.76-7.73                                              | m, 2H                    | 7.70                                                 | s, 1H                    |
| 2  |                                                        |                          | 7.67                                                 | s, 1H                    |
| 3  | 5.17                                                   | d, <i>J</i> = 5.4 Hz, 1H | 5.15                                                 | d, <i>J</i> = 5.5 Hz, 1H |
| 4  | 3.92                                                   | d, <i>J</i> = 5.4 Hz, 1H | 3.90                                                 | d, <i>J</i> = 5.5 Hz, 1H |
| 5  | 3.87                                                   | s, 3H                    | 3.84                                                 | s, 3H                    |
| 6  | 3.00                                                   | s, 3H                    | 2.94                                                 | s, 3H                    |
| 7  | 2.97-2.93                                              | m, 1H                    | 2.90                                                 | m, 1H                    |
| 8  | 2.85-2.79                                              | m, 1H                    | 2.73                                                 | m, 1H                    |
| 9  | 2.52                                                   | s, 3H                    | 2.48                                                 | s, 3H                    |
| 10 | 2.44-2.37                                              | m, 1H                    | 2.31                                                 | m, 1H                    |
| 11 | 1.92-1.85                                              | m, 1H                    | 1.86                                                 | m, 1H                    |
| 12 | 1.80-1.73                                              | m, 1H                    | 1.69                                                 | m, 1H                    |
| 13 | 1.41-1.32                                              | m, 1H                    | 1.32                                                 | m, 1H                    |

**Table 4 Comparison of  $^{13}\text{C}$  NMR Data of Synthetic and Natural Amathaspiramide A**

|    | <b>Synthetic<br/>(150 MHz, <math>\text{CDCl}_3</math>)</b> | <b>Natural<br/>(100 MHz, <math>\text{CDCl}_3</math>)</b> |
|----|------------------------------------------------------------|----------------------------------------------------------|
| 1  | 174.9                                                      | 175.2                                                    |
| 2  | 154.3                                                      | 154.1                                                    |
| 3  | 135.2                                                      | 135.0                                                    |
| 4  | 134.5                                                      | 134.6                                                    |
| 5  | 118.0                                                      | 118.3                                                    |
| 6  | 117.0                                                      | 117.1                                                    |
| 7  | 111.1                                                      | 111.0                                                    |
| 8  | 82.6                                                       | 82.6                                                     |
| 9  | 71.2                                                       | 71.3                                                     |
| 10 | 57.4                                                       | 57.4                                                     |
| 11 | 56.2                                                       | 56.2                                                     |
| 12 | 51.3                                                       | 51.3                                                     |
| 13 | 37.1                                                       | 37.0                                                     |
| 14 | 36.6                                                       | 36.5                                                     |
| 15 | 27.7                                                       | 27.7                                                     |
| 16 | 23.7                                                       | 23.6                                                     |

\* Data for natural amathaspiramide A were obtained from the literature<sup>5</sup>

## 4. NMR Spectra

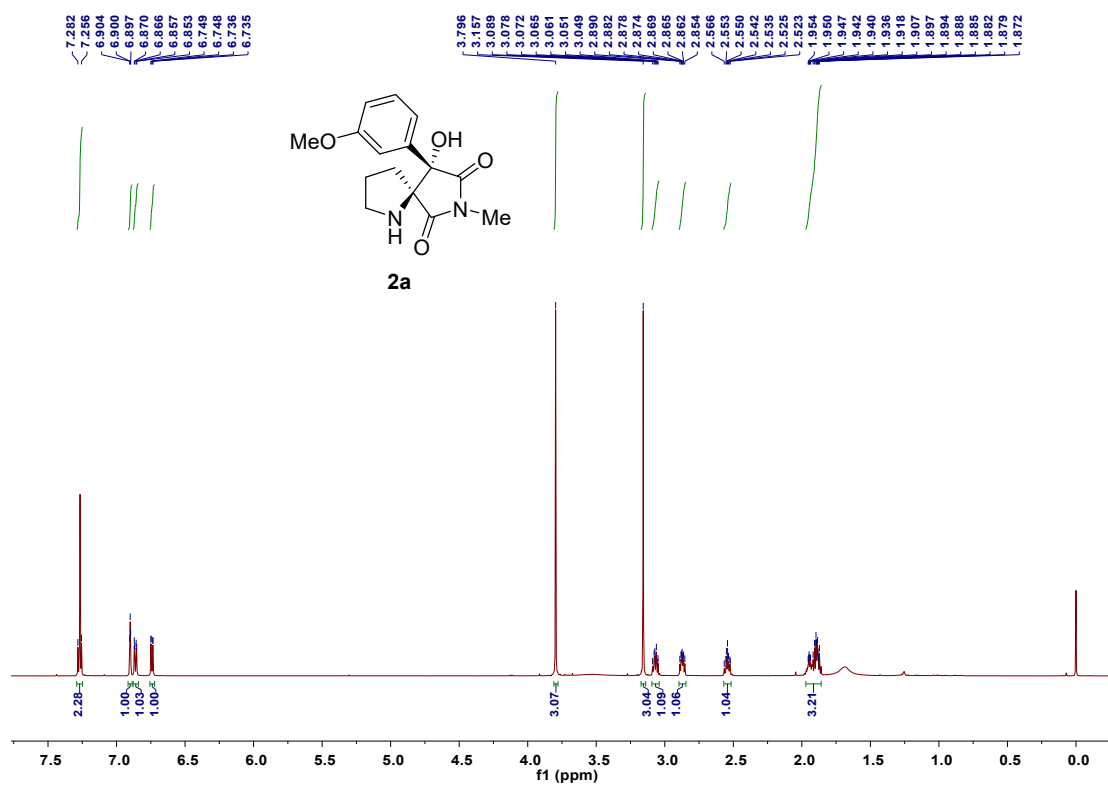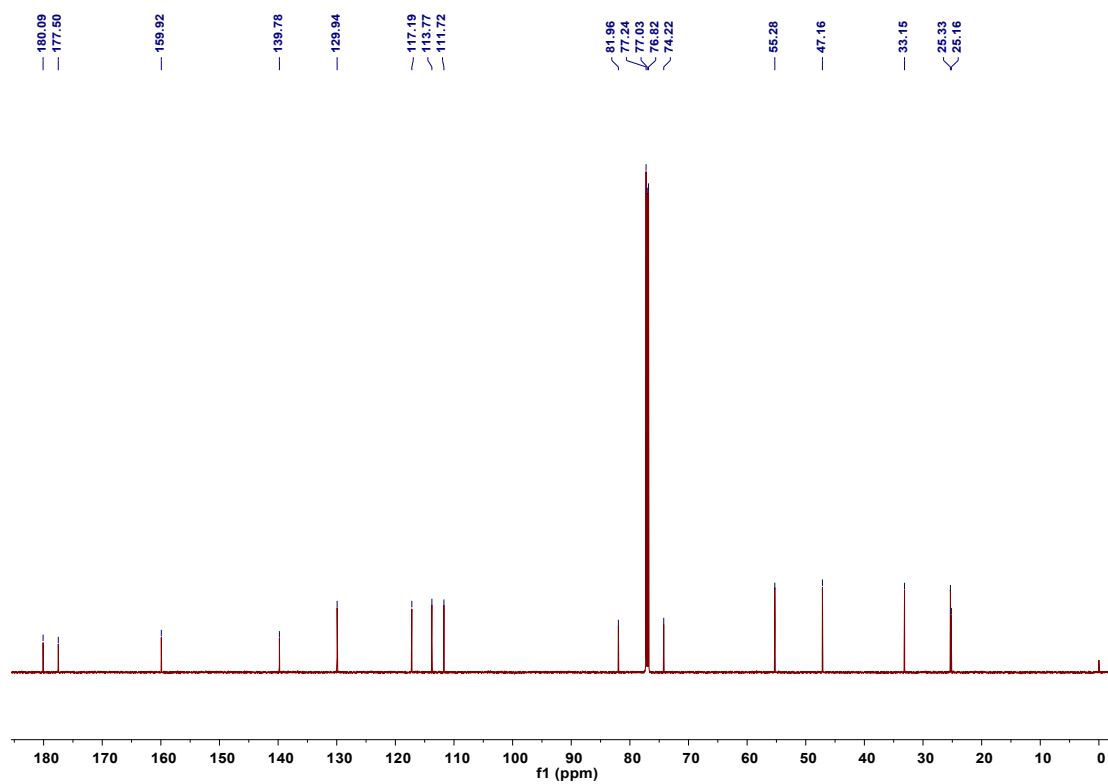



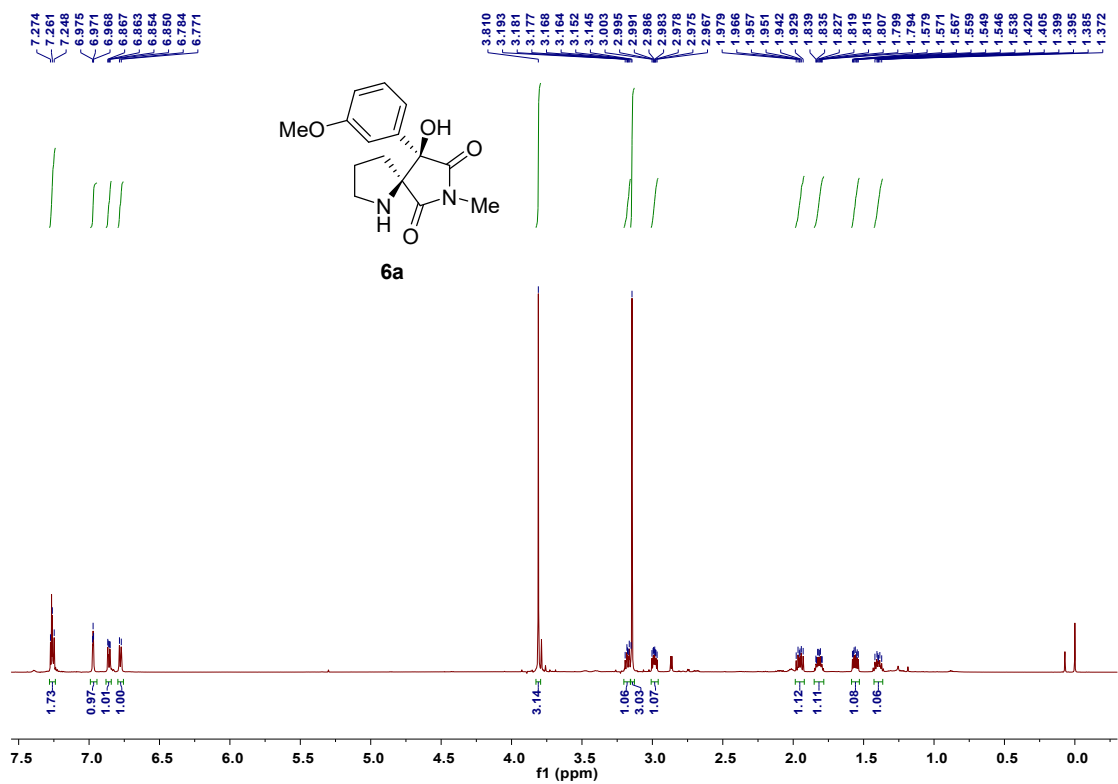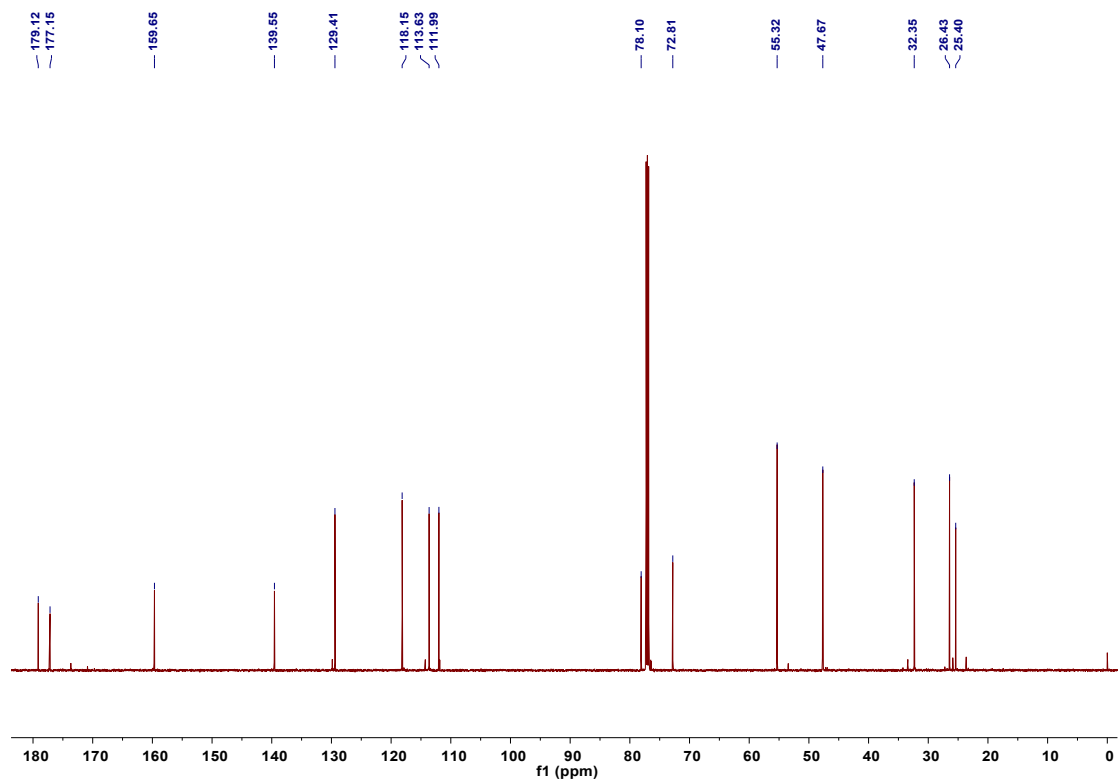

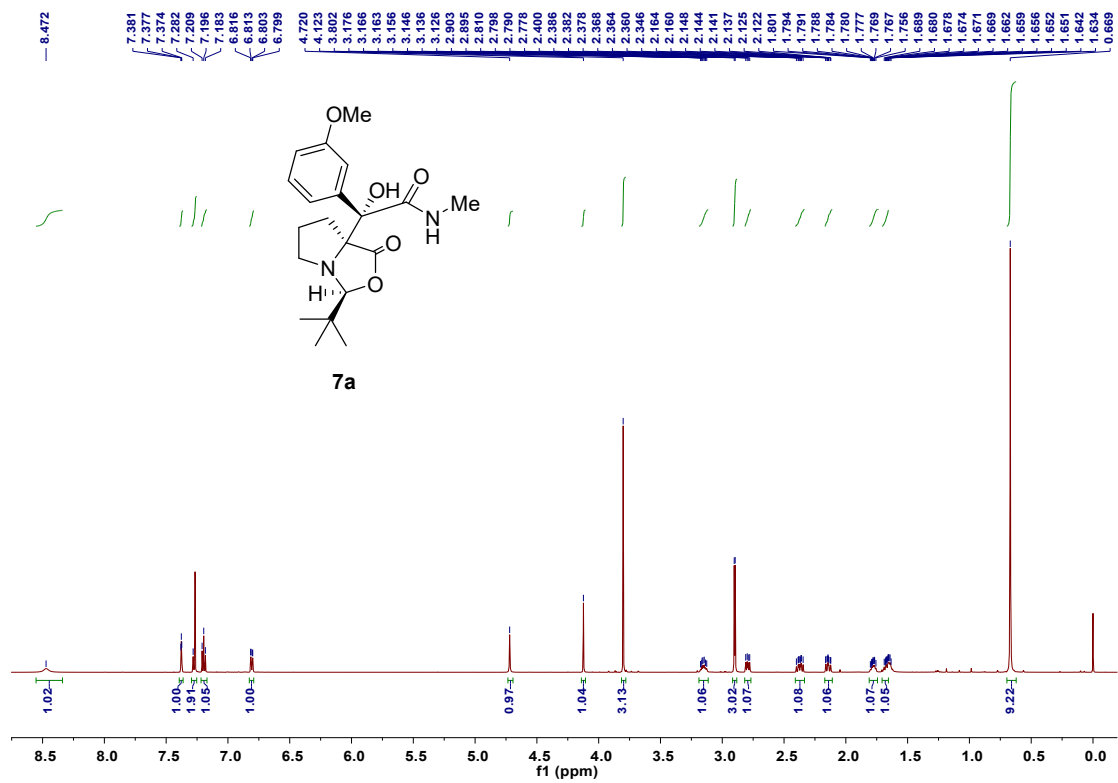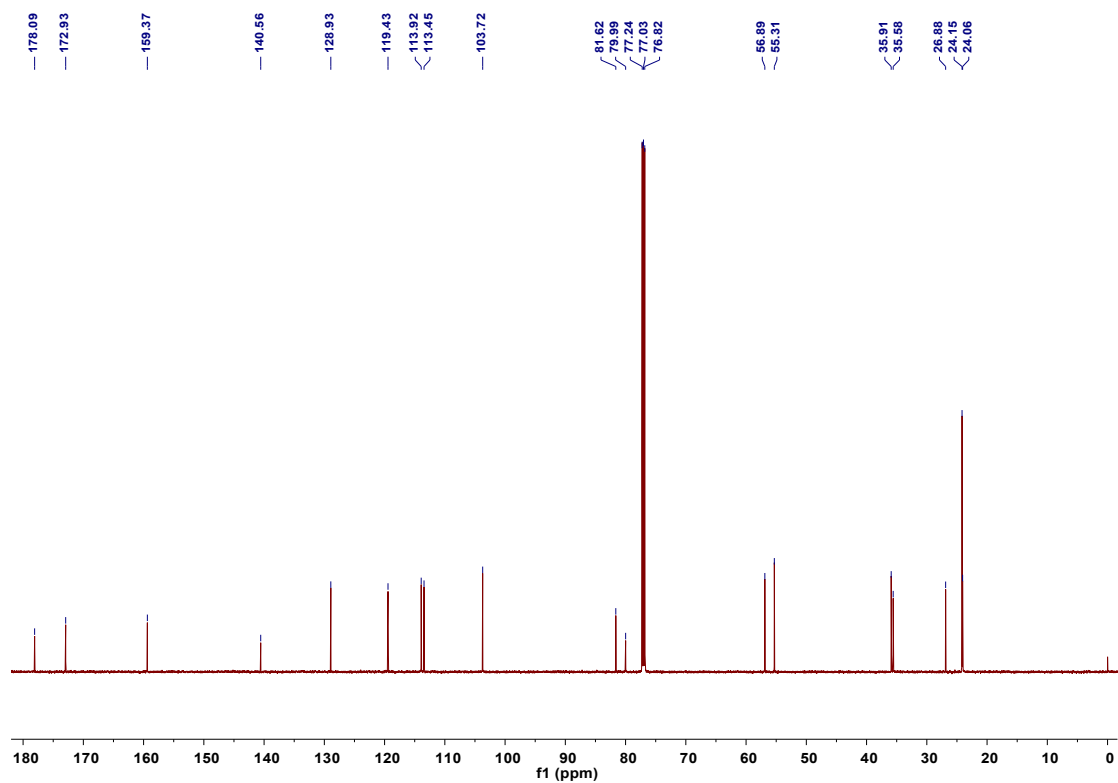

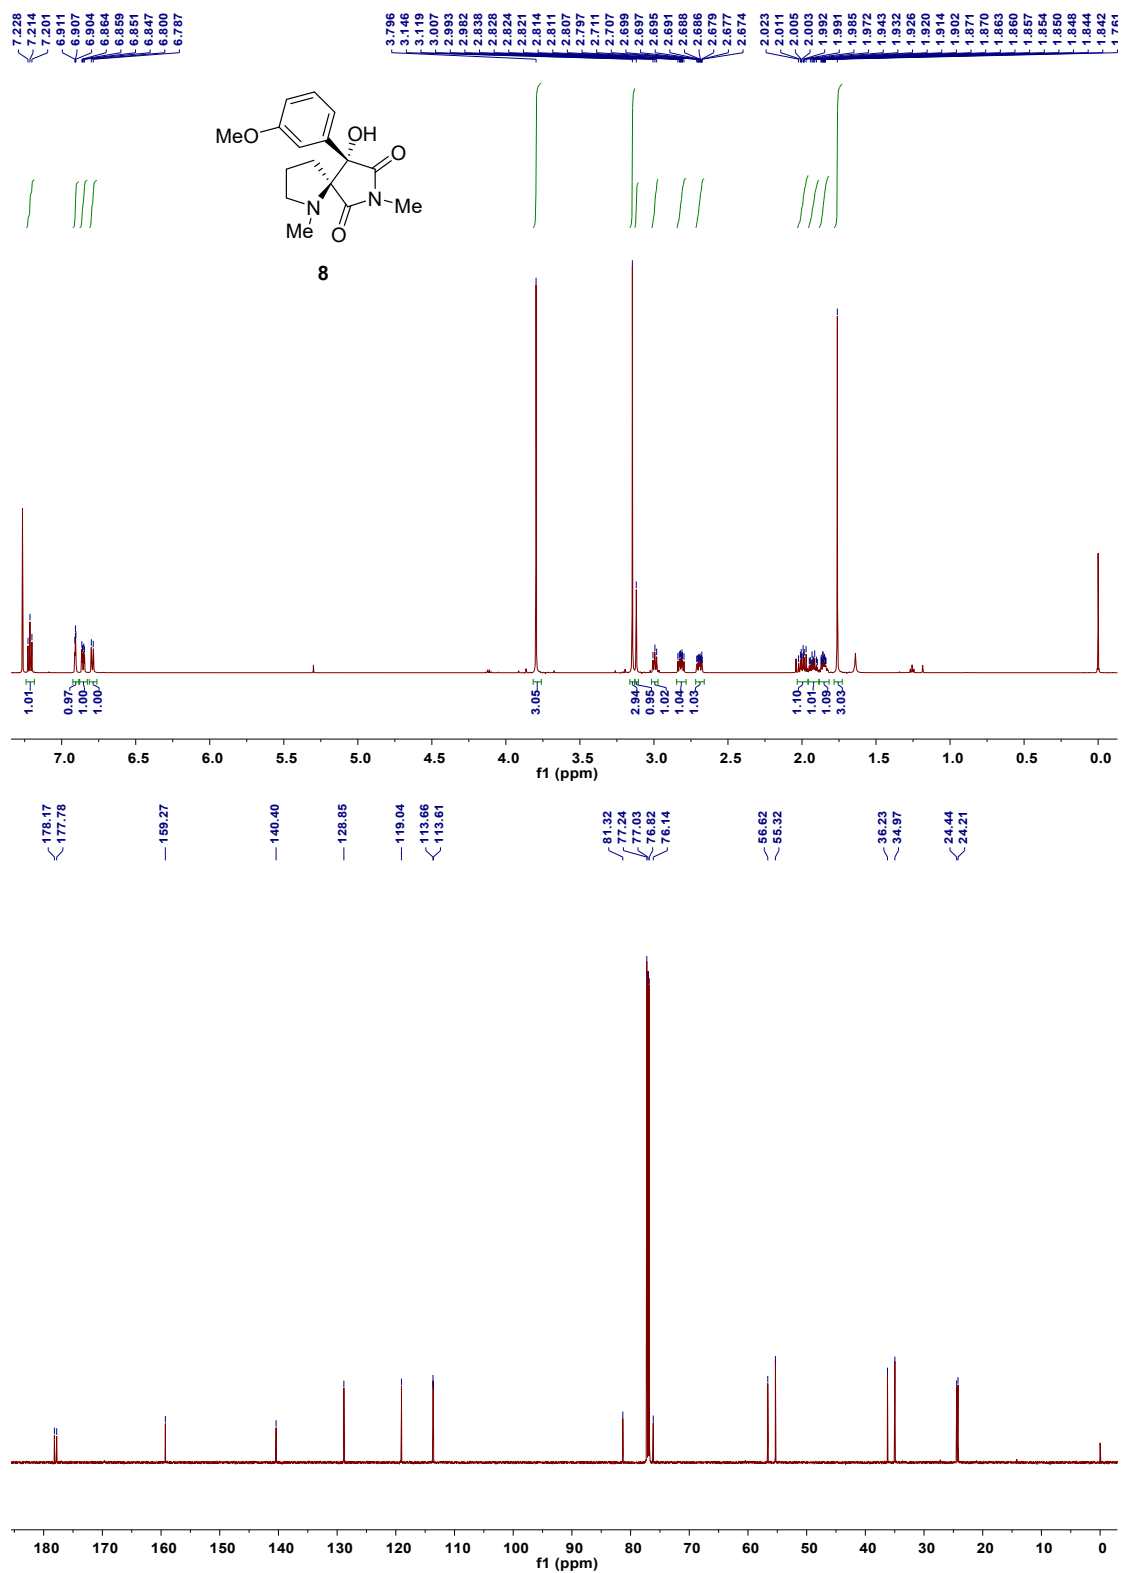

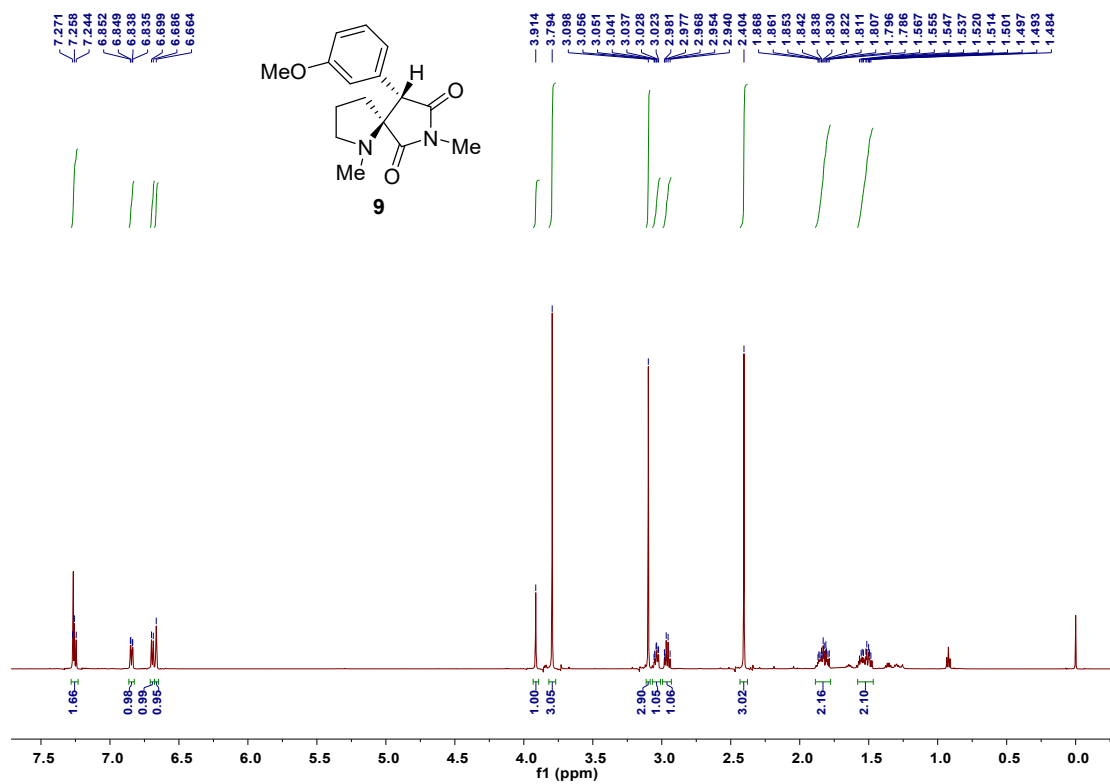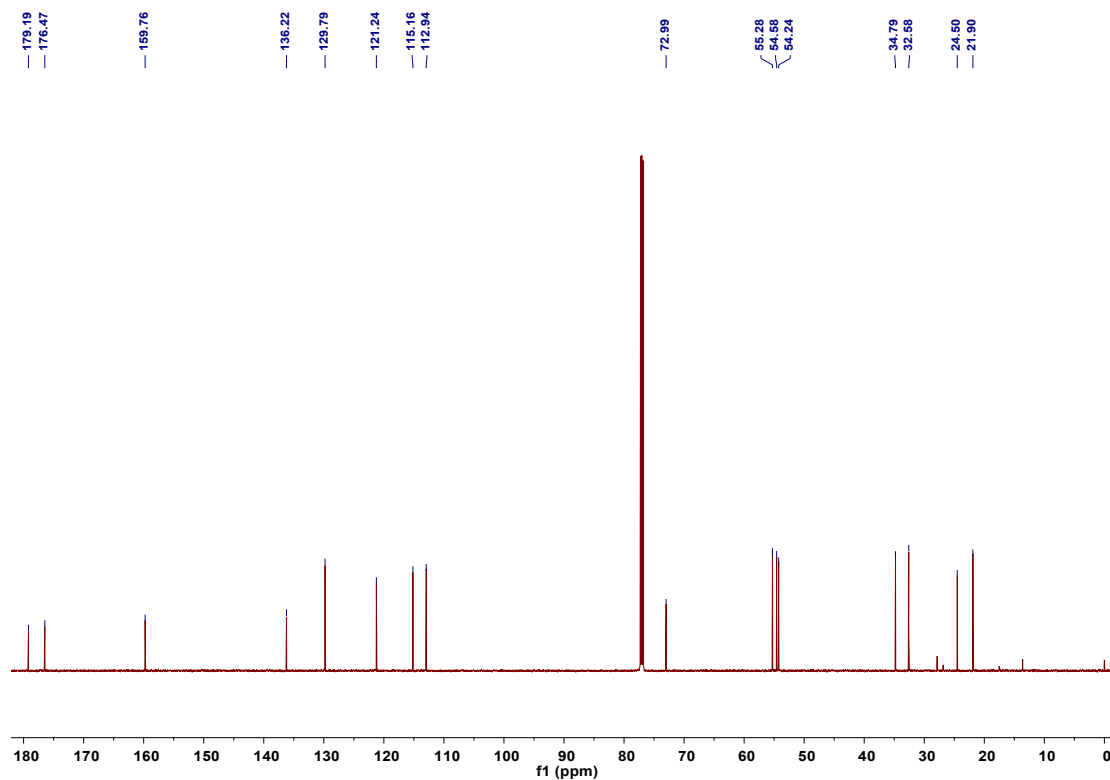



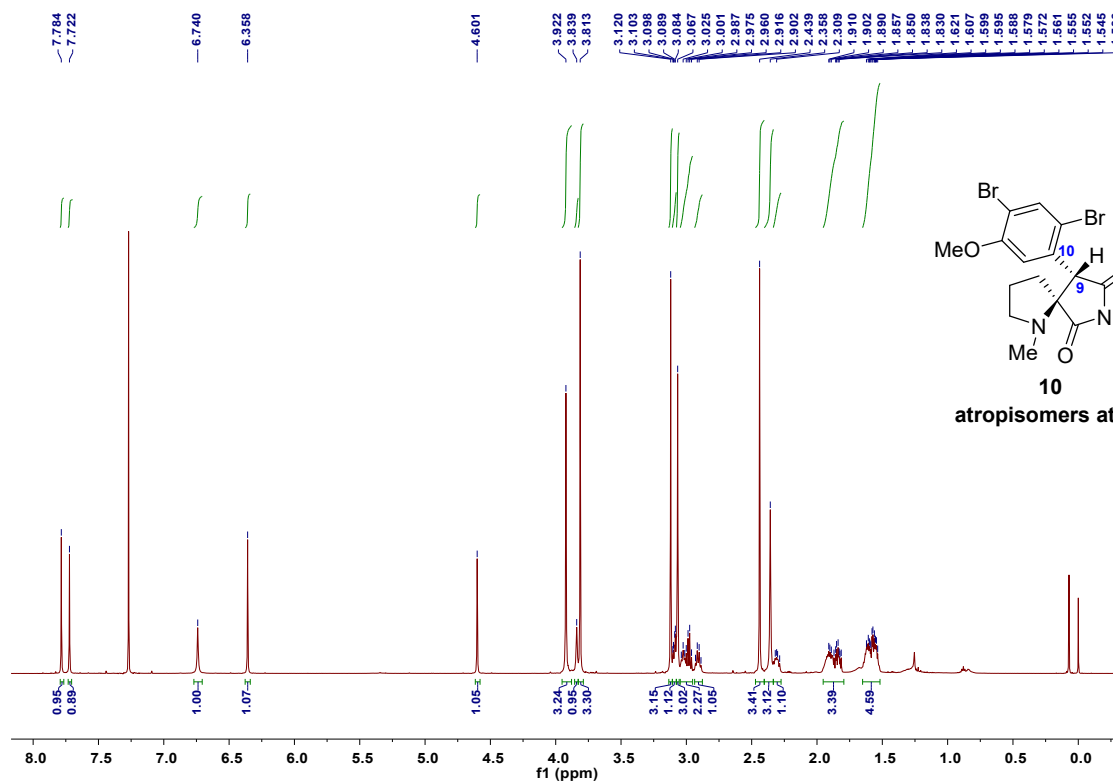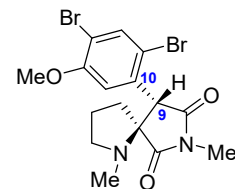

**10**  
atropisomers at C9-C10 bond

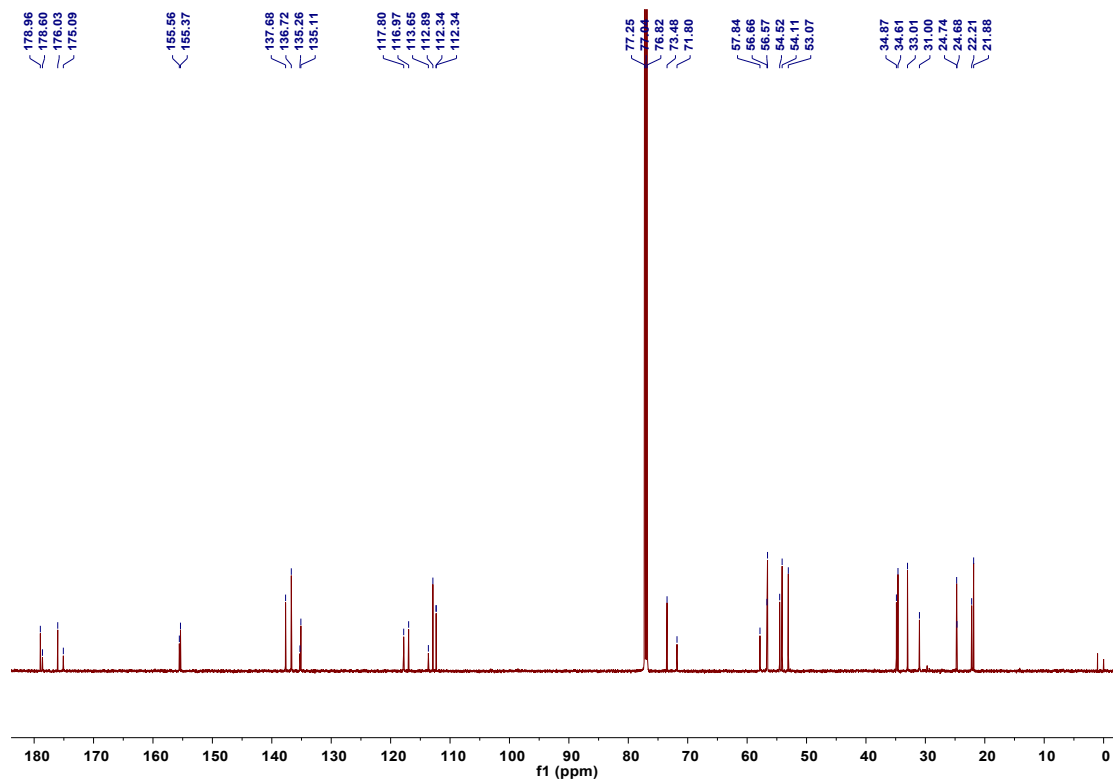

Variable-temperature NMR spectroscopy in DMSO-*d*<sub>6</sub> was used to investigate the atropisomers of **10**, in which two sets of signals in <sup>1</sup>H NMR spectra were observed at room temperature and coalesced over 105 °C.

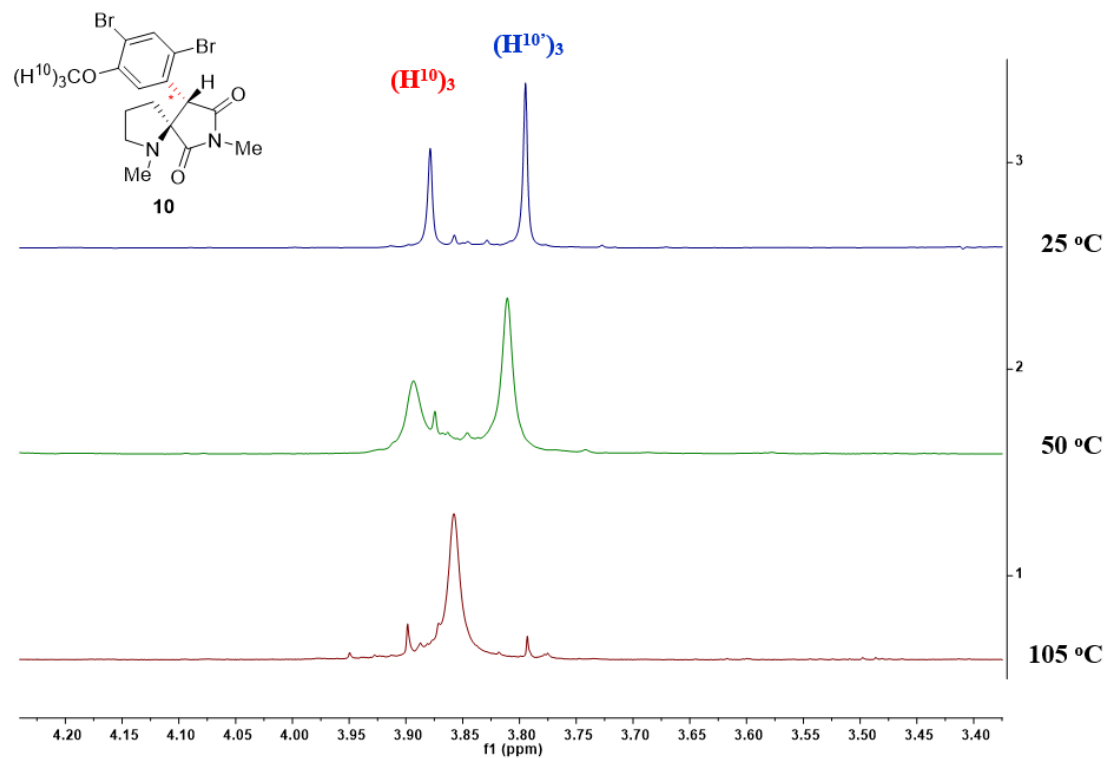

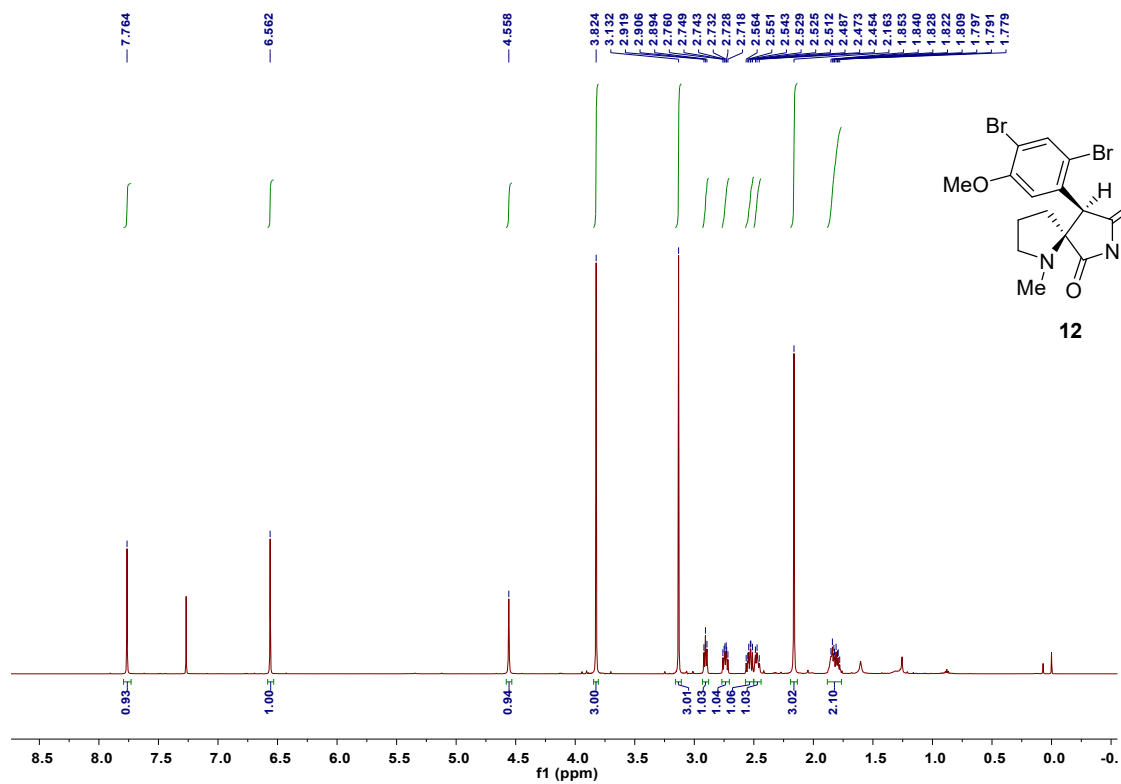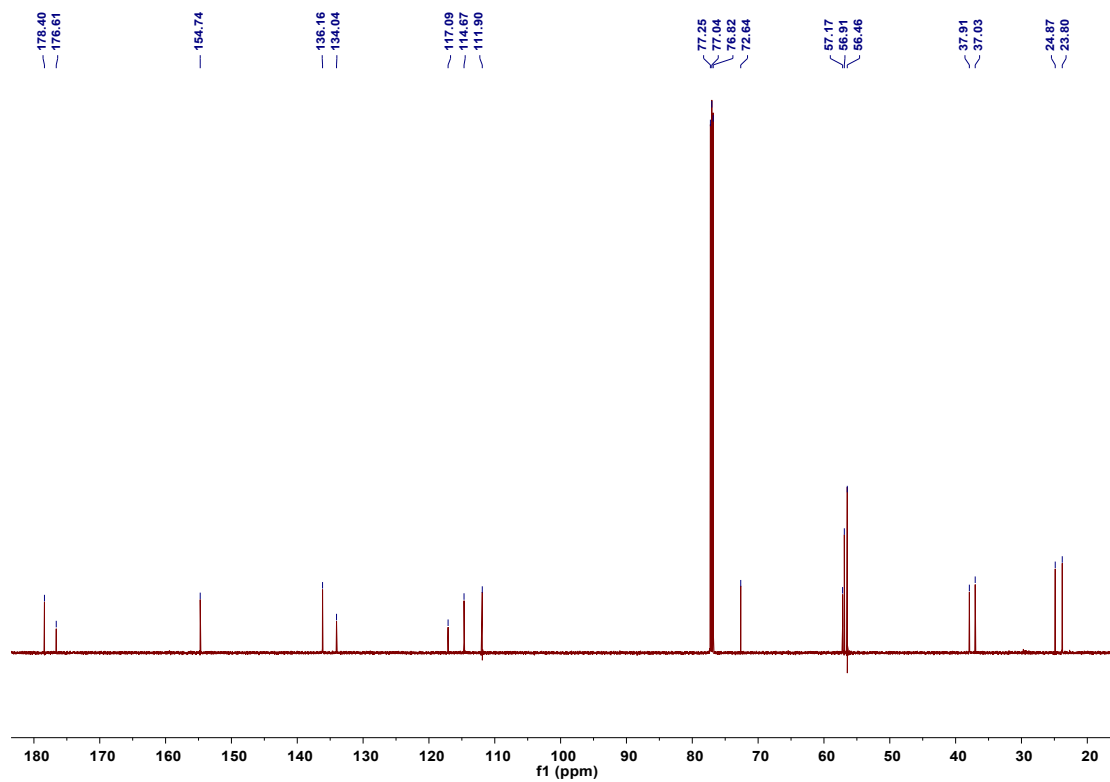



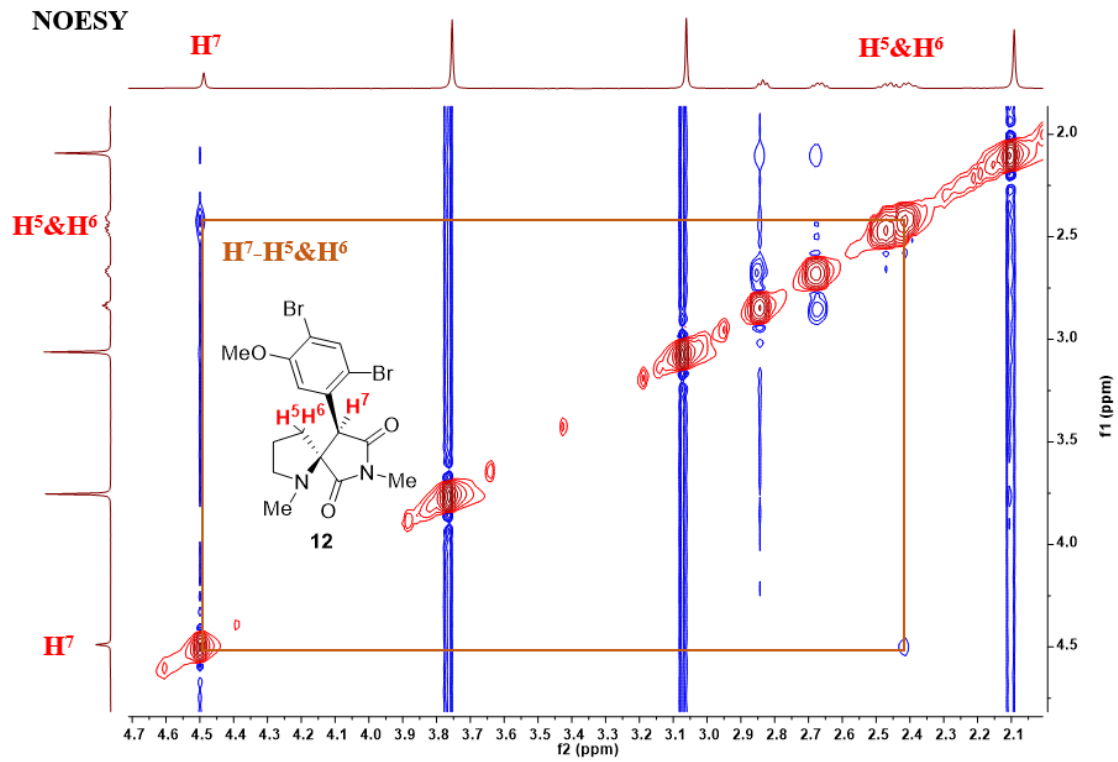

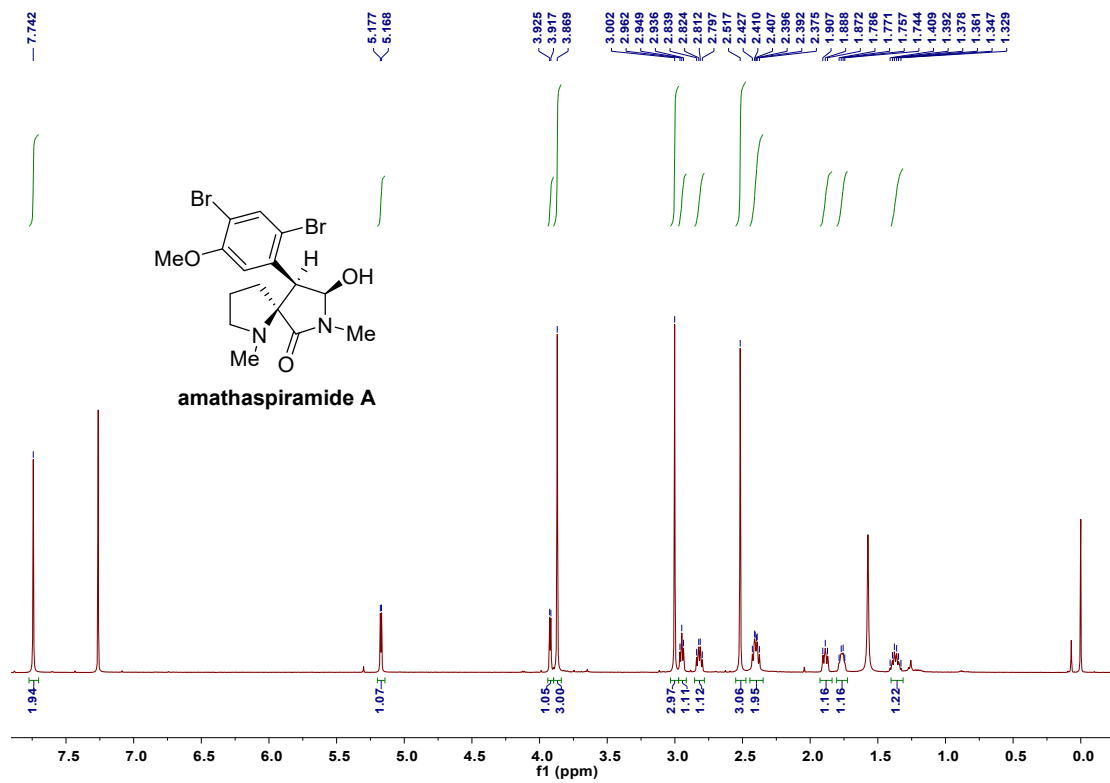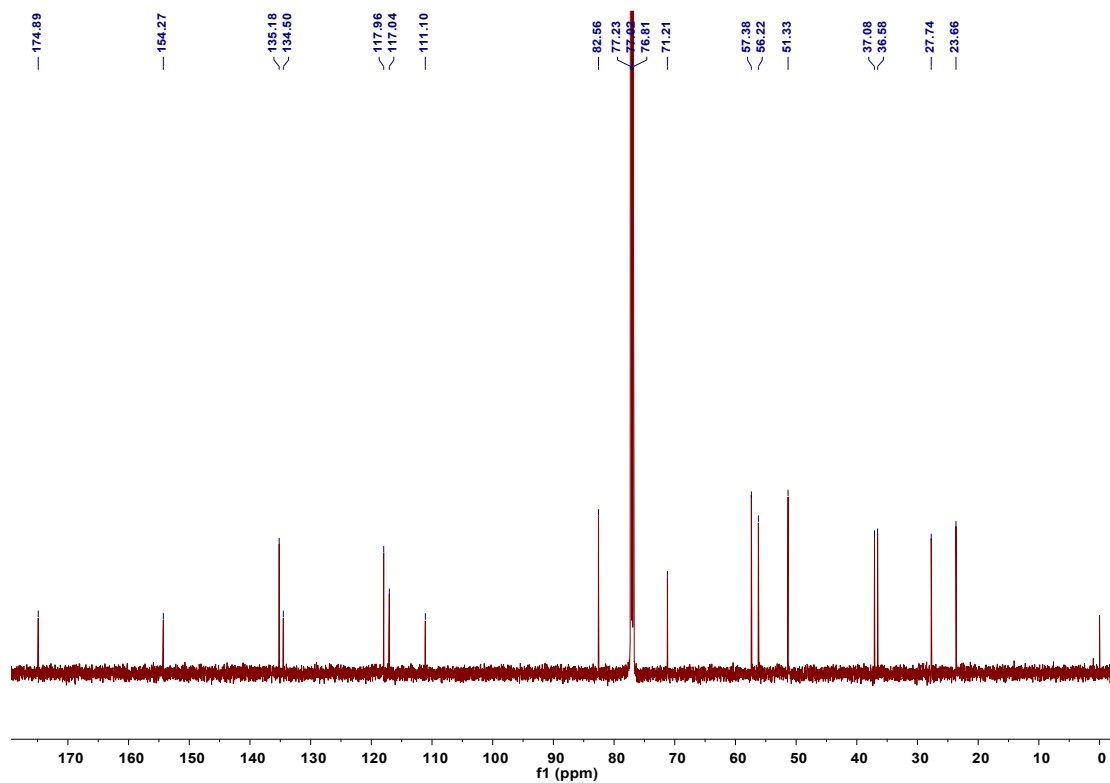

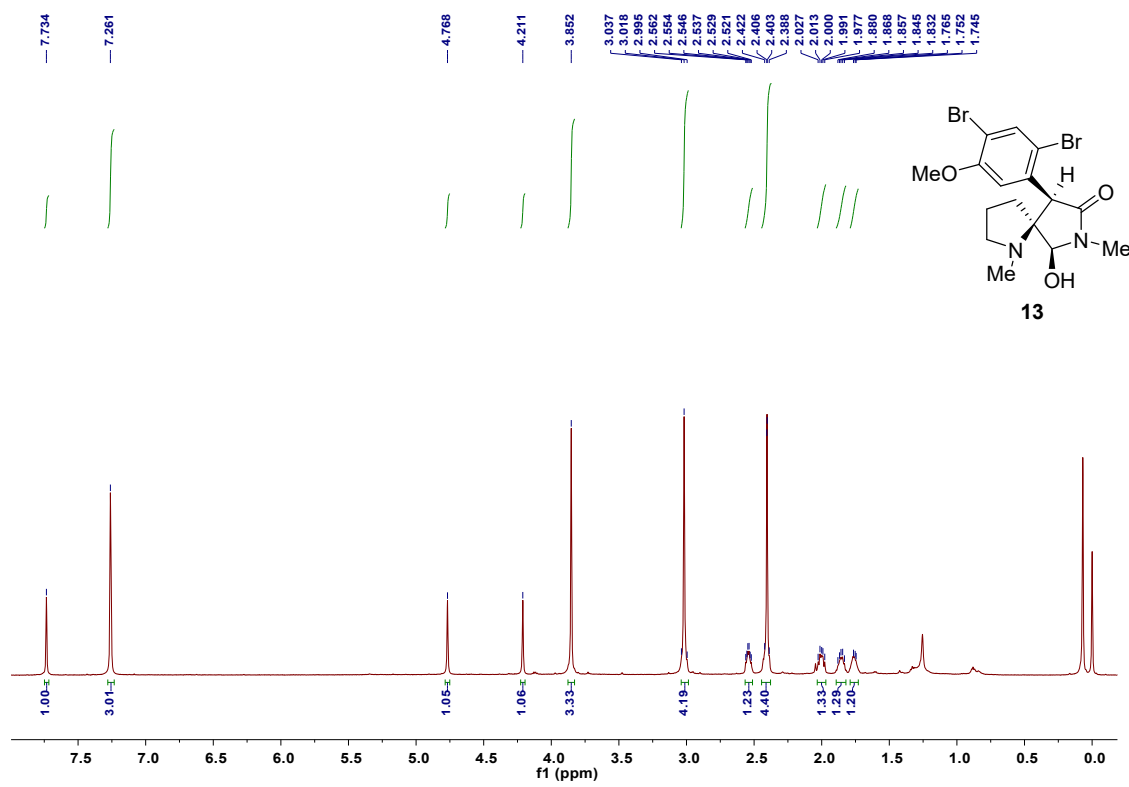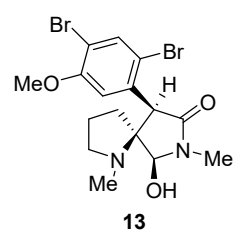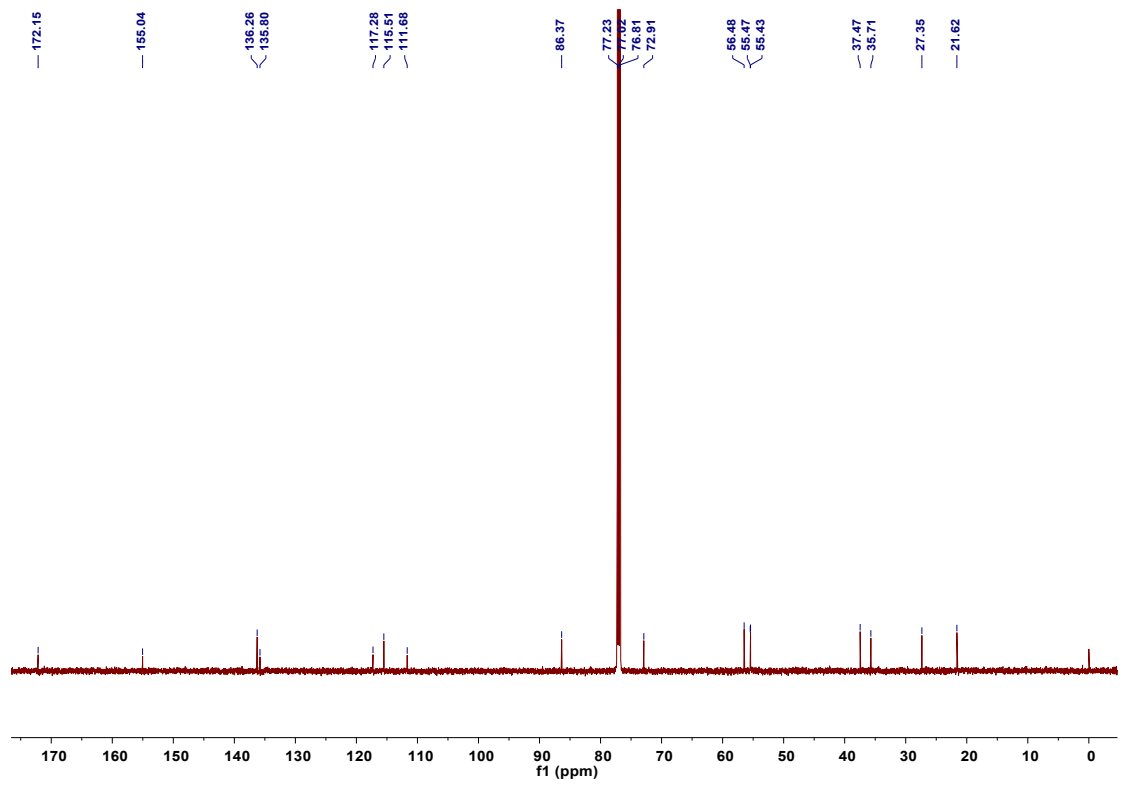

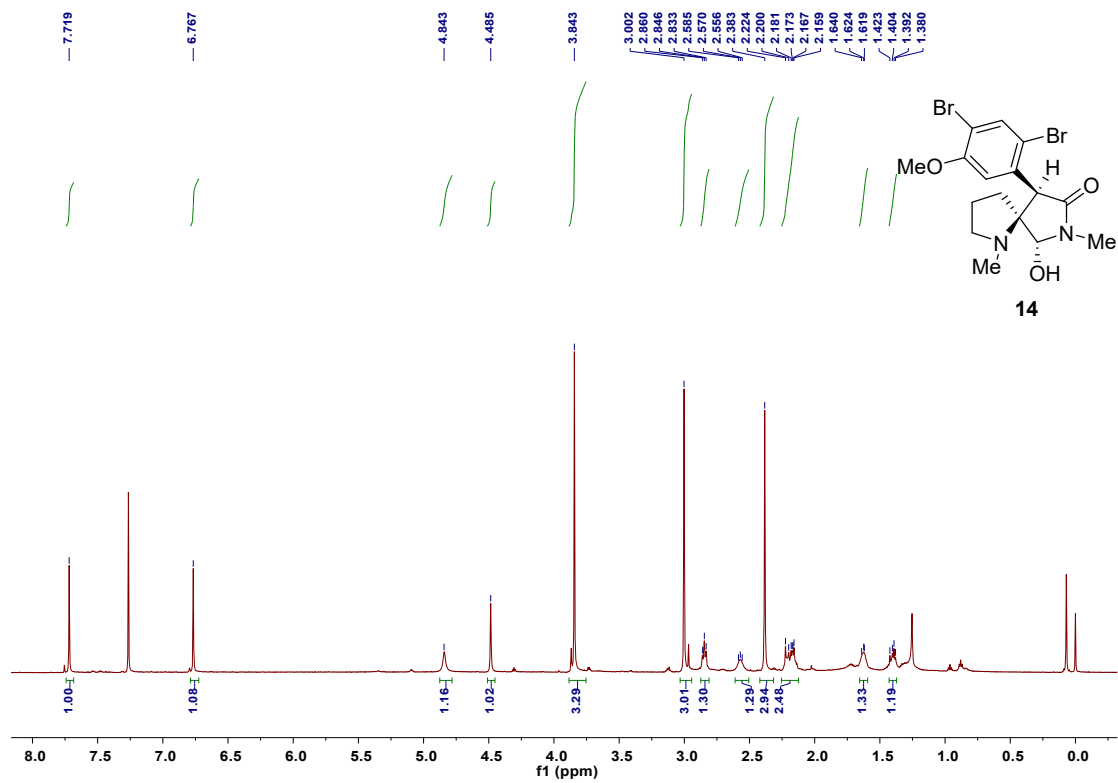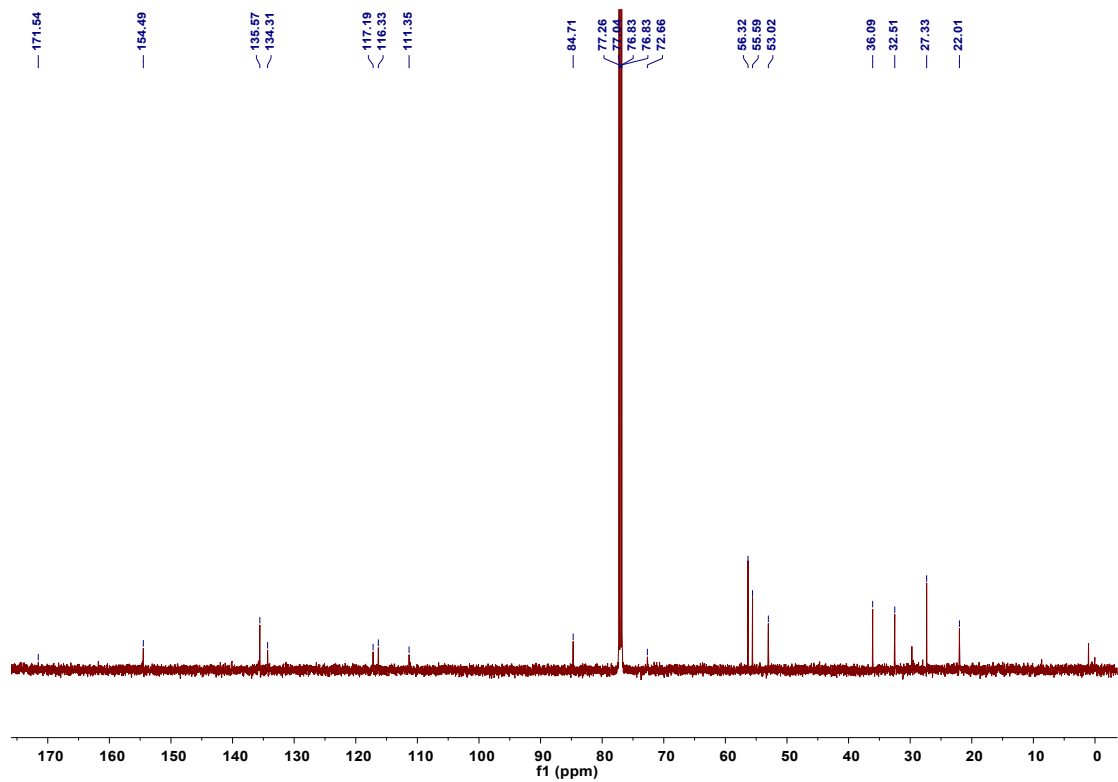

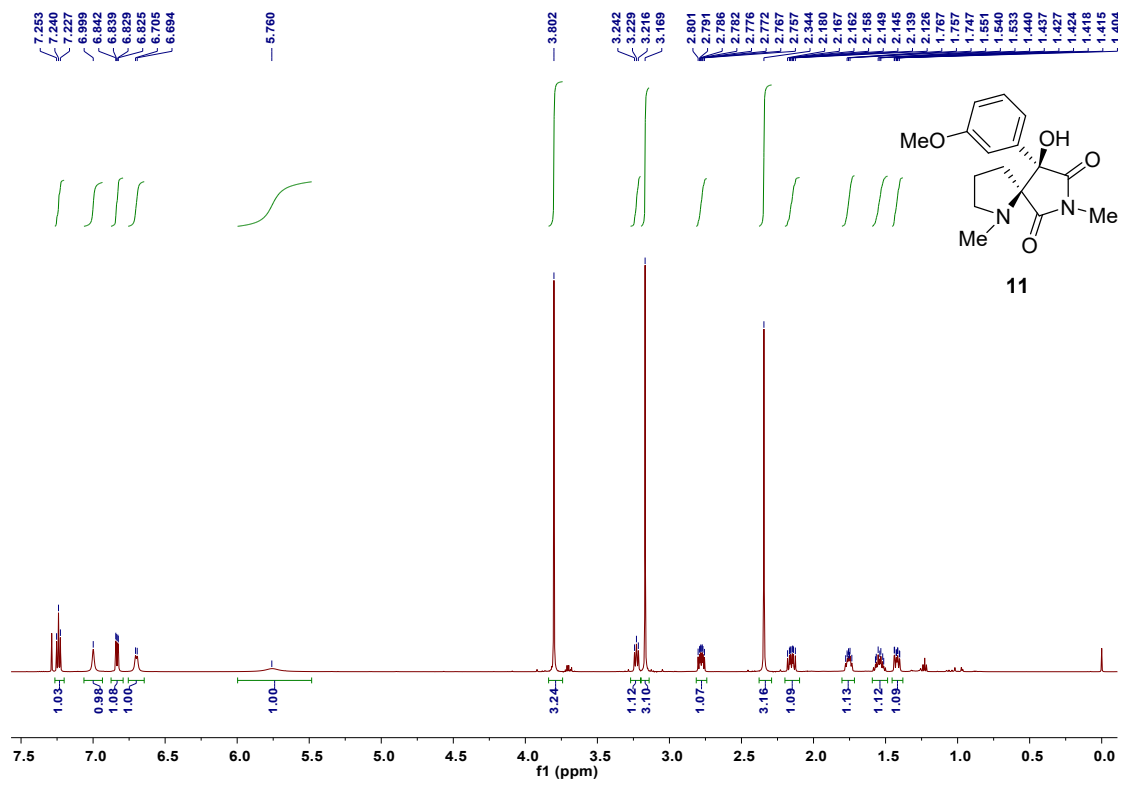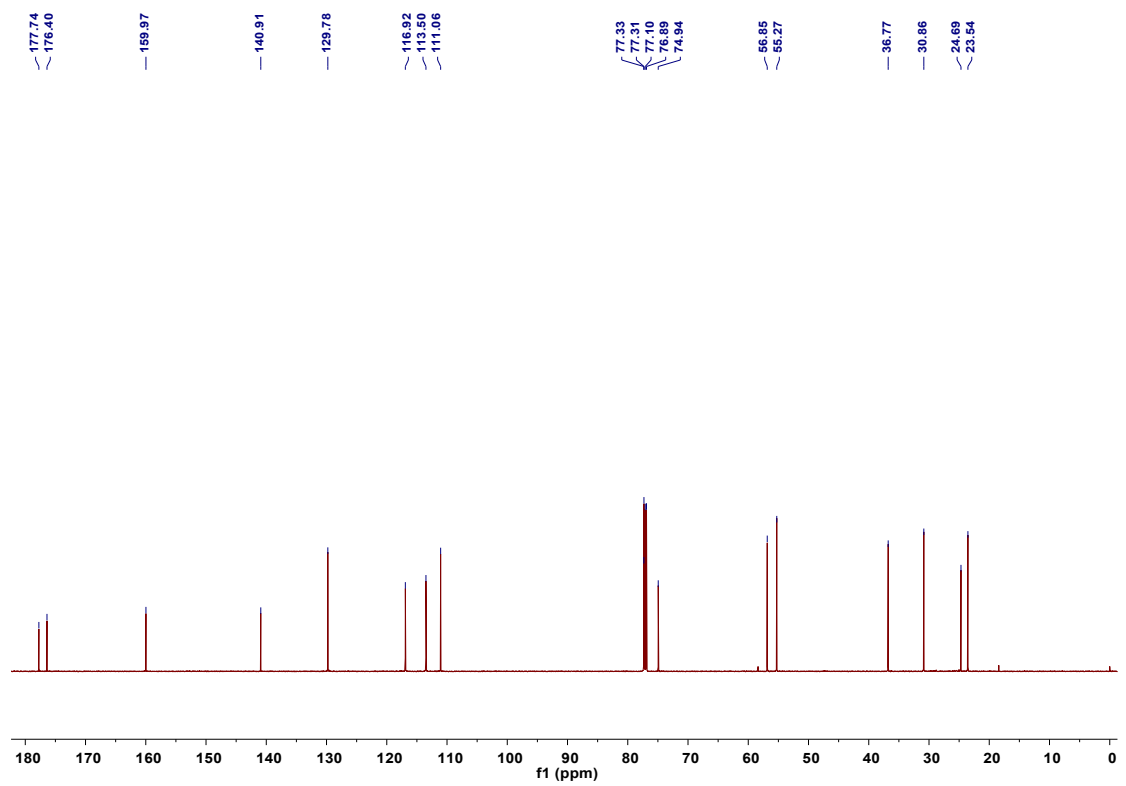

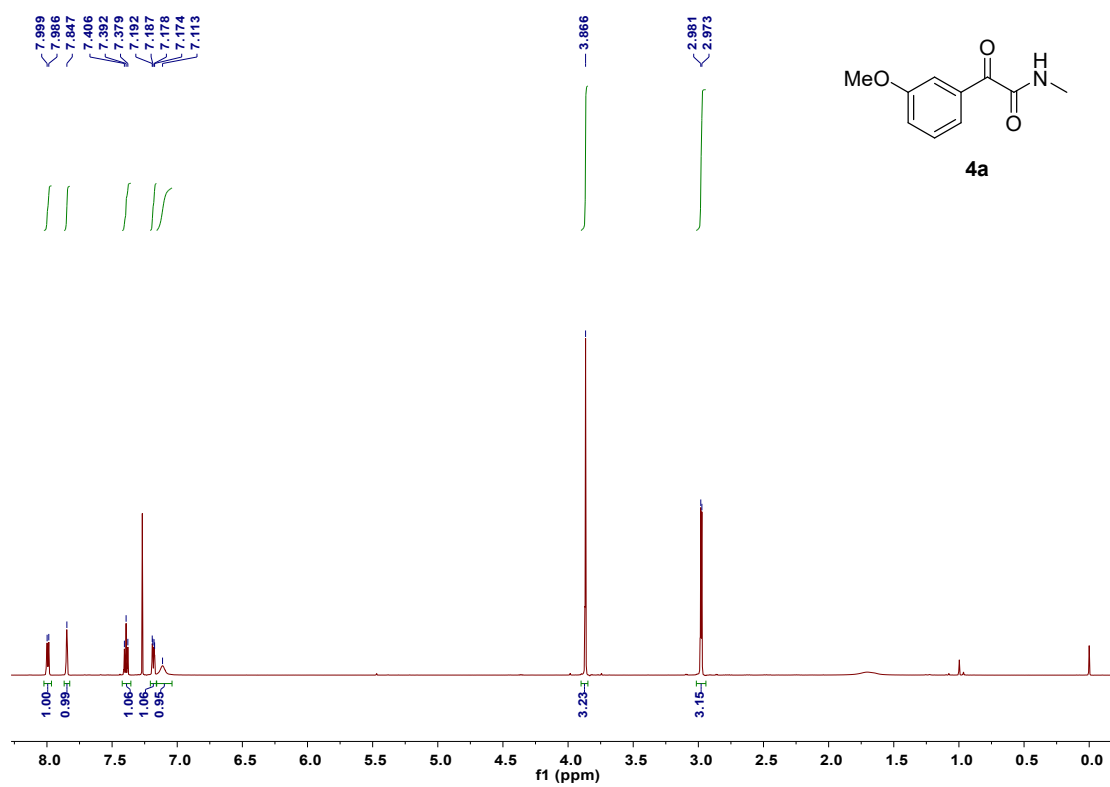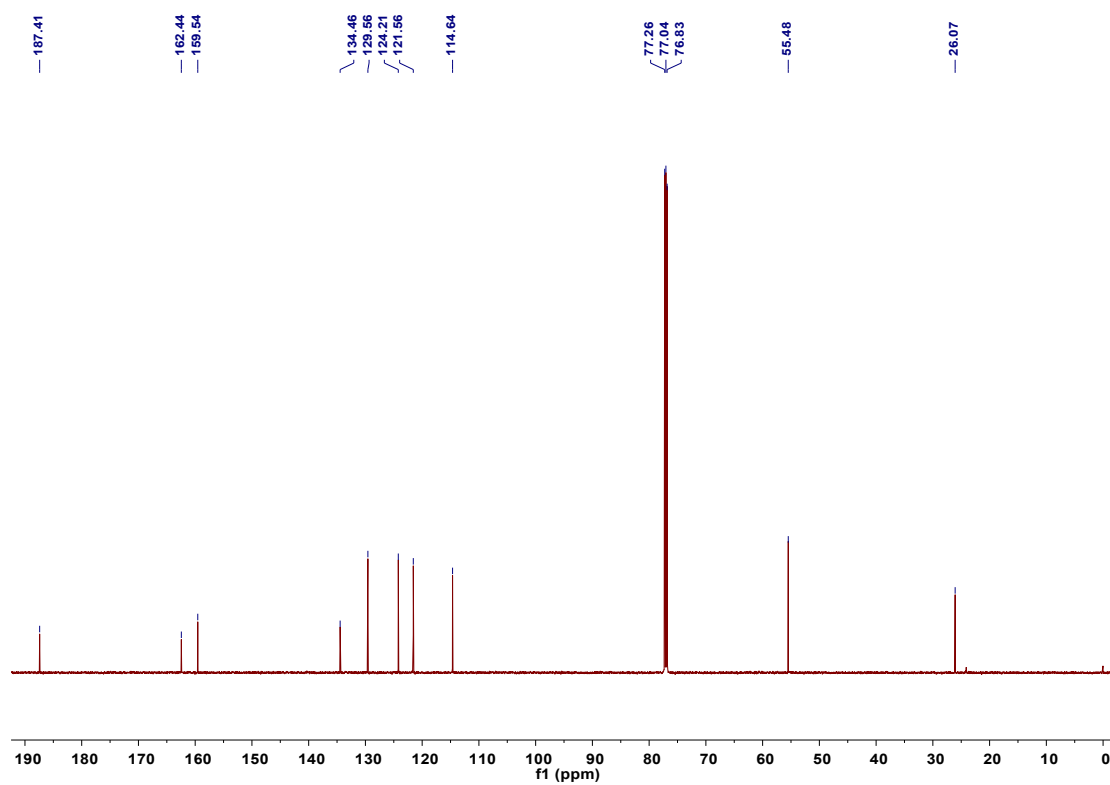

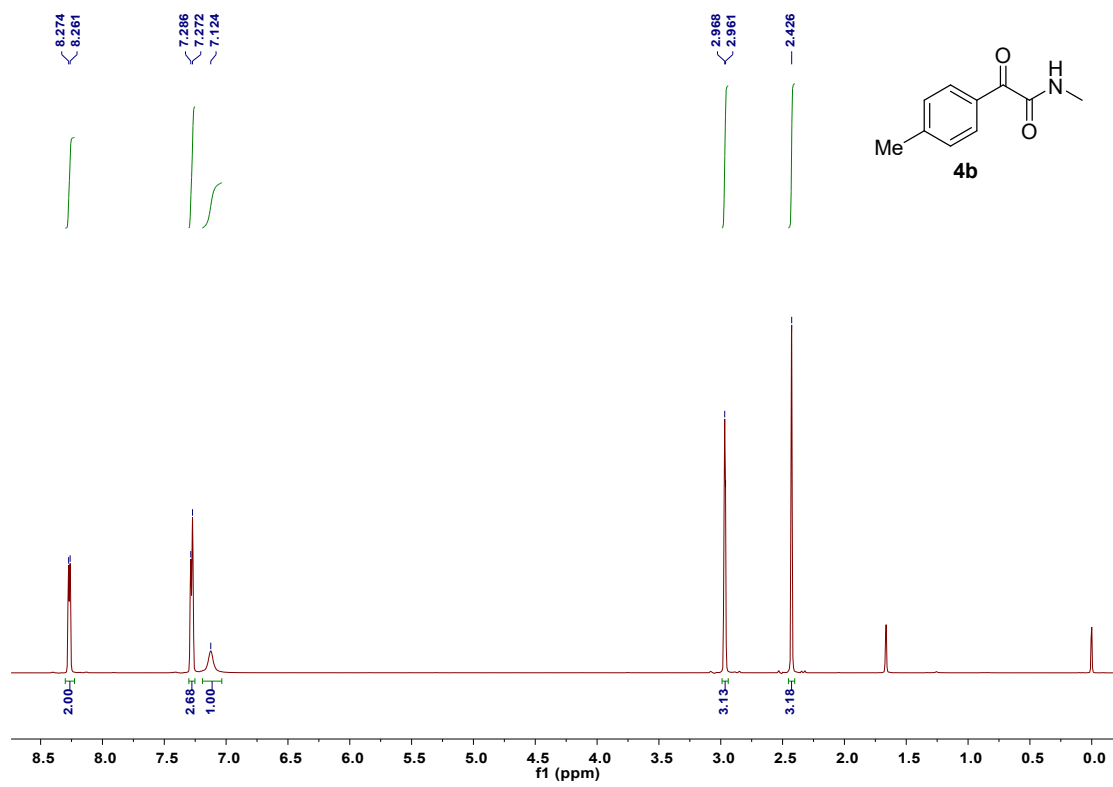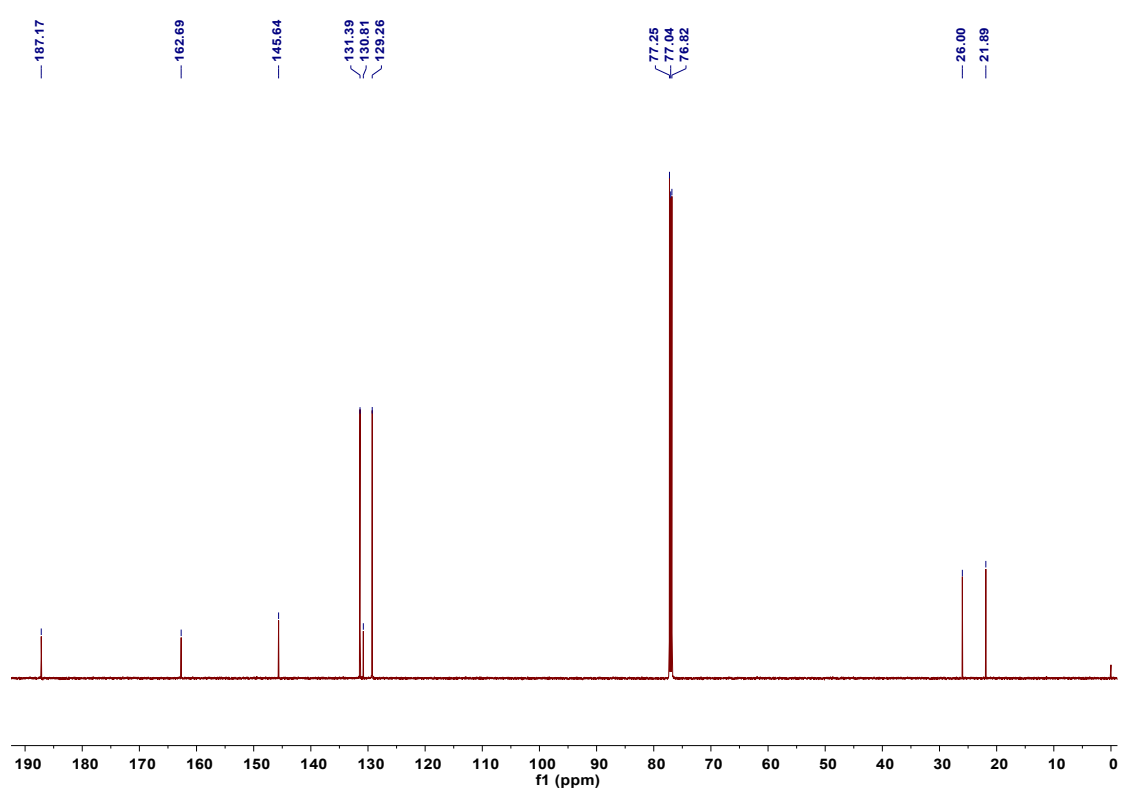

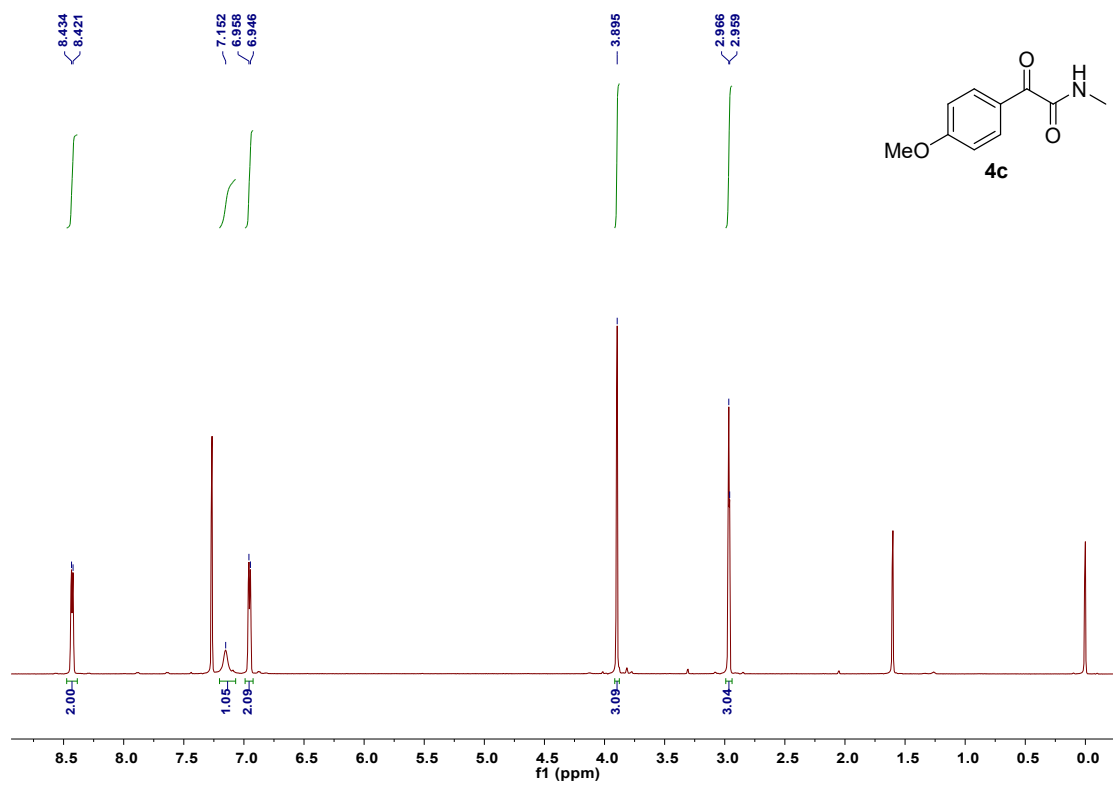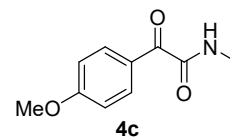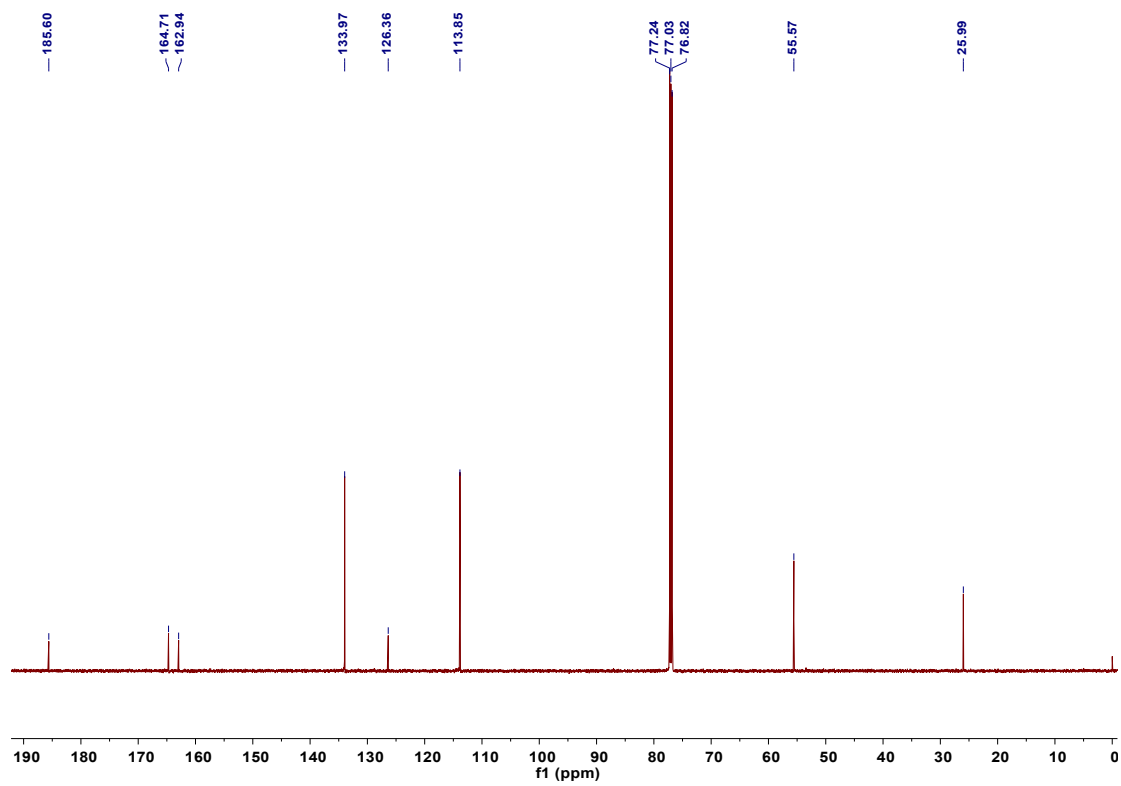



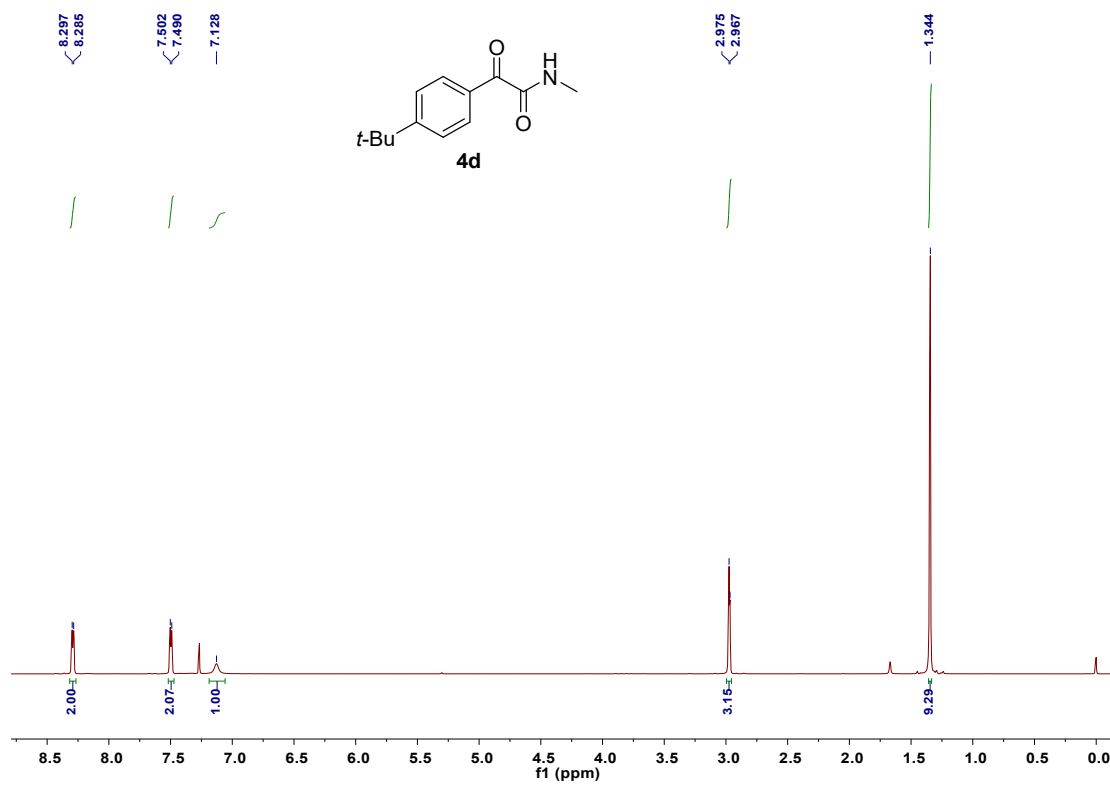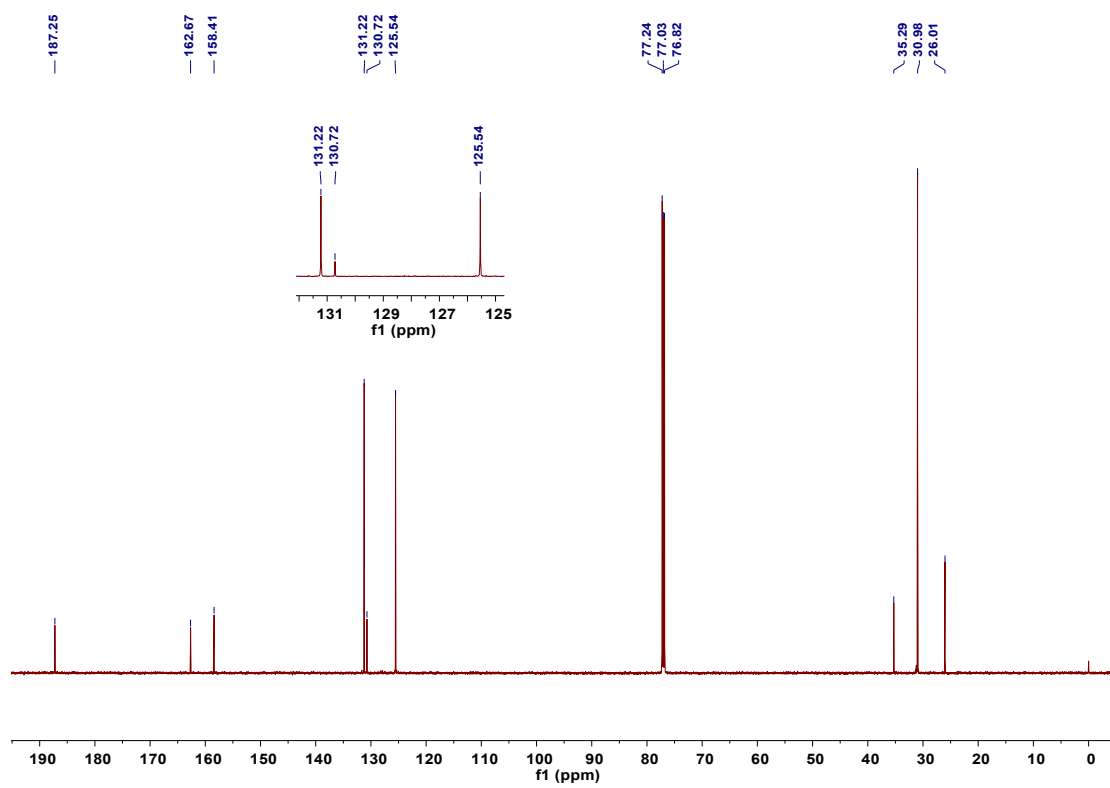

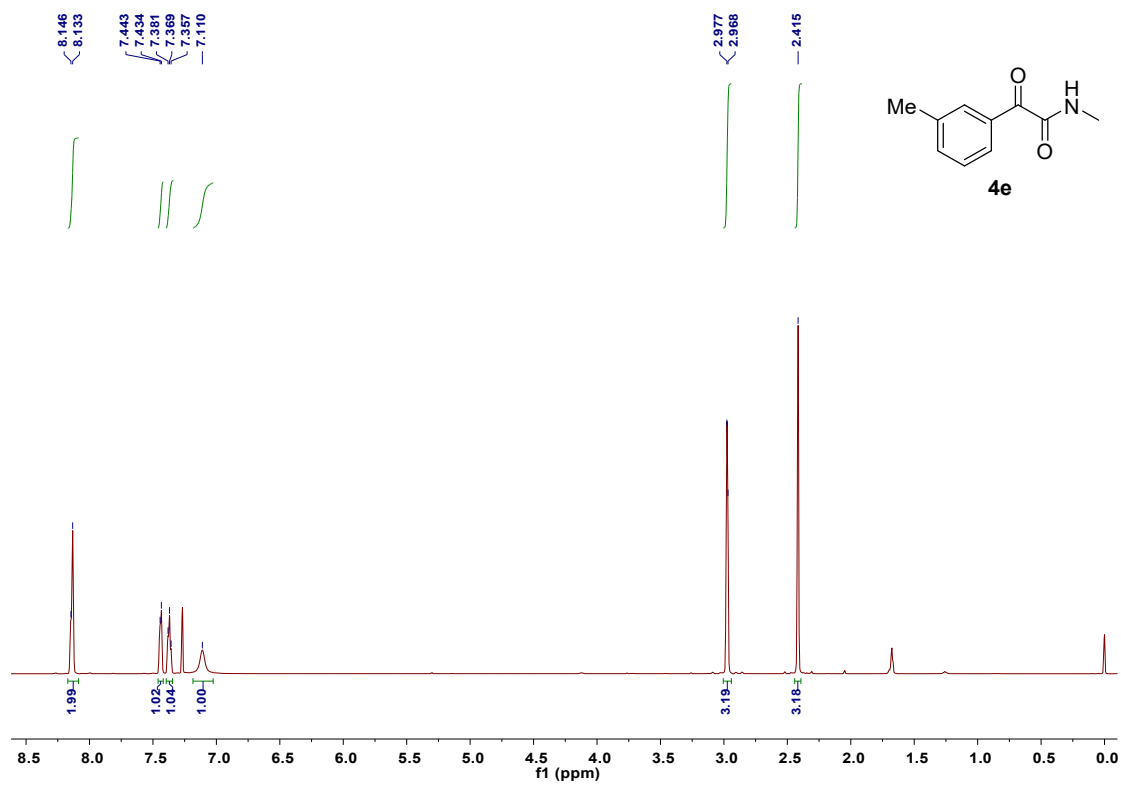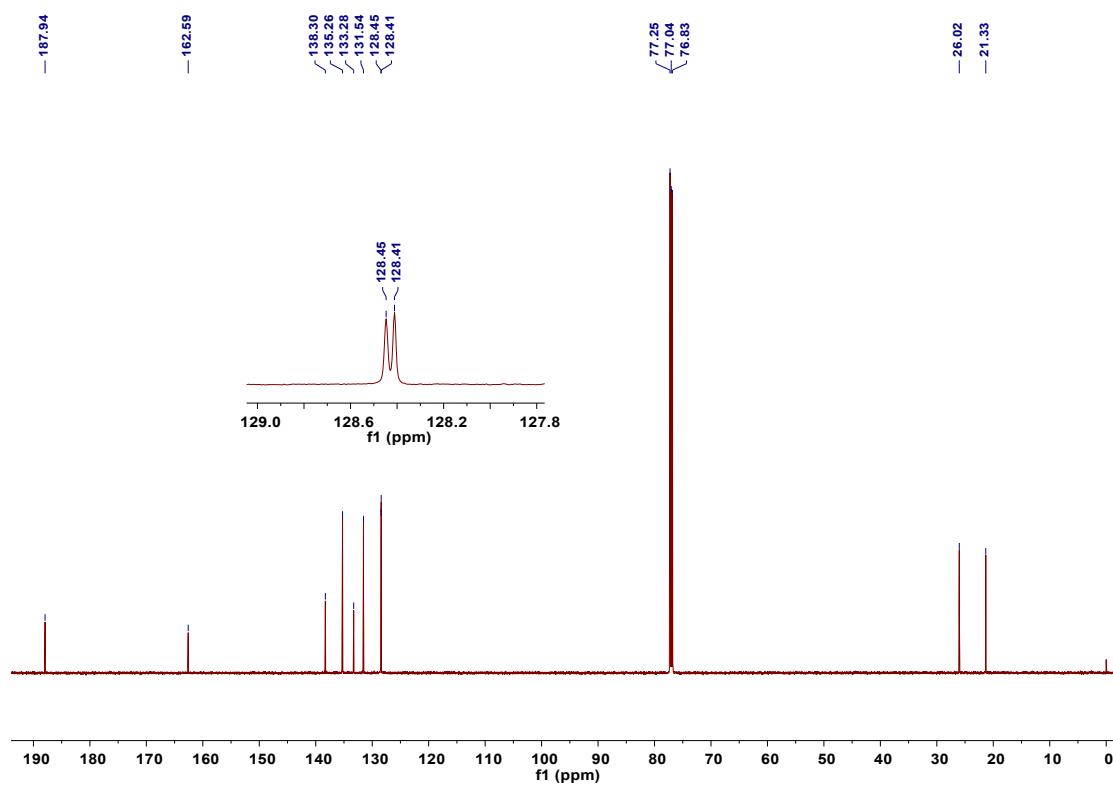

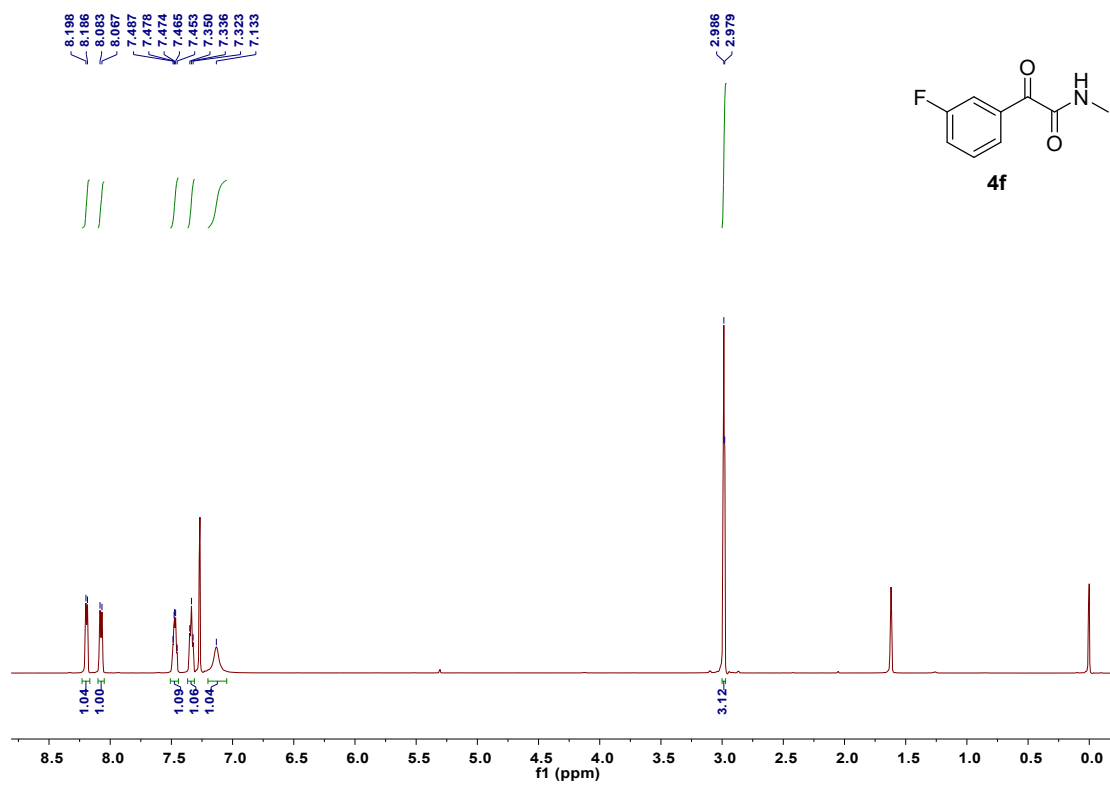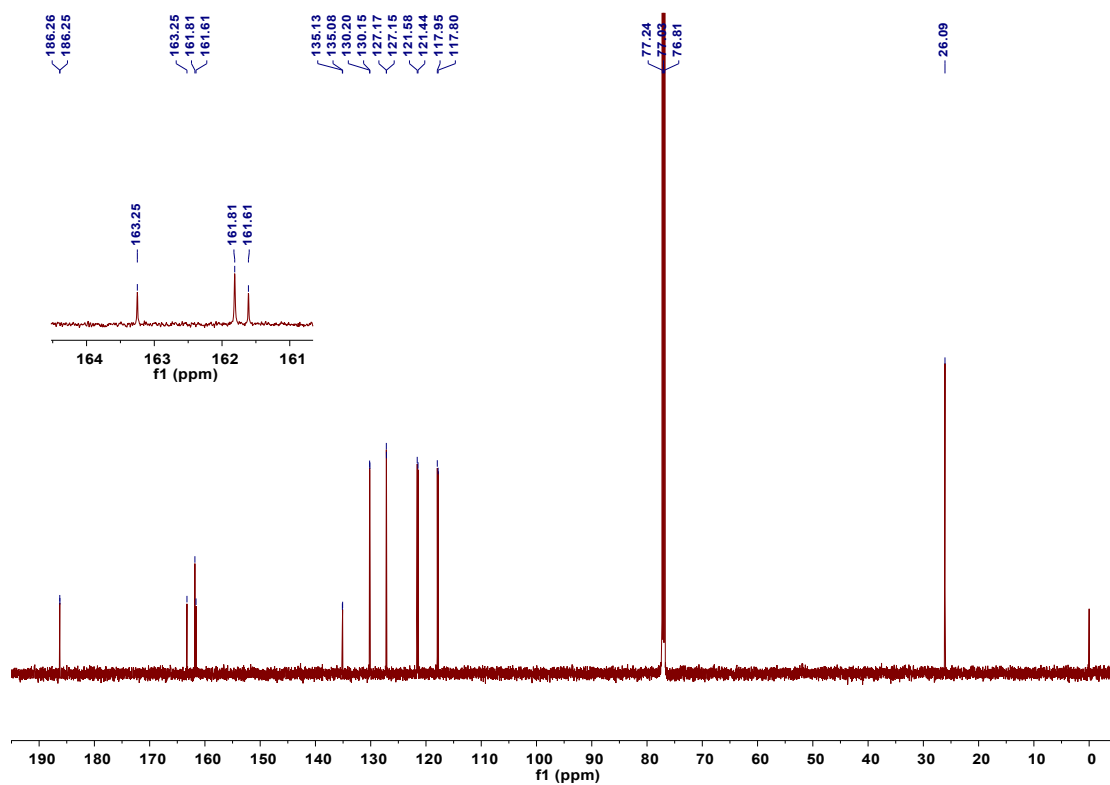





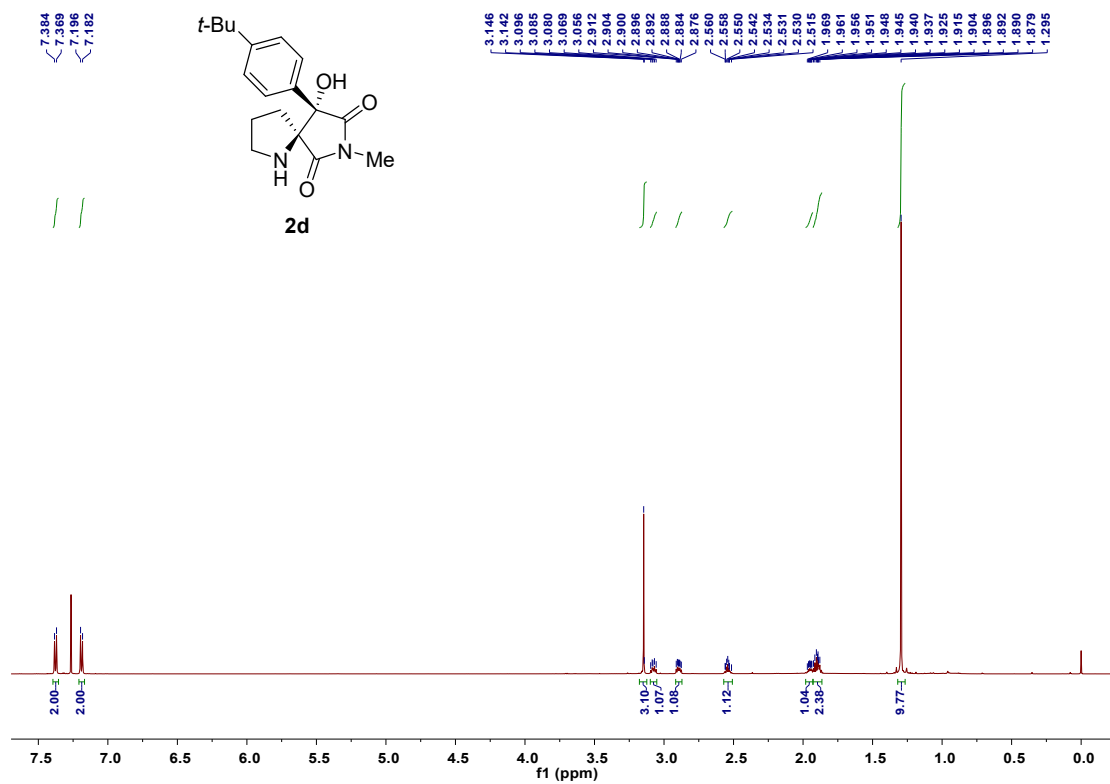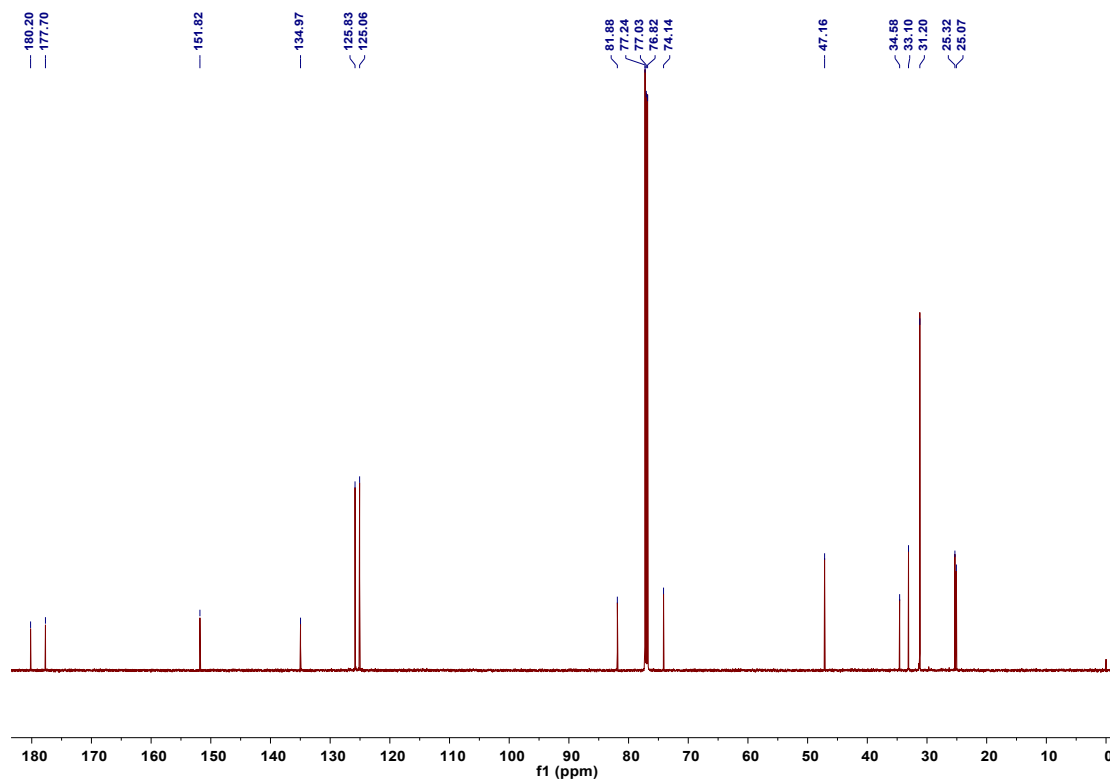

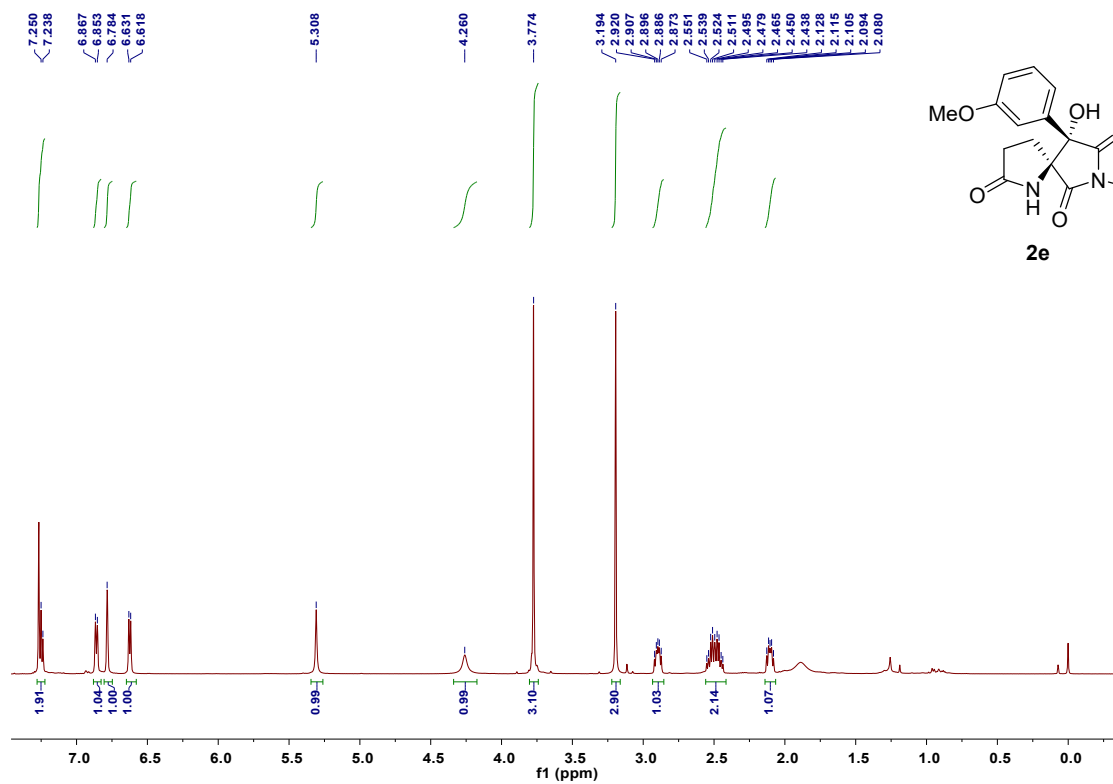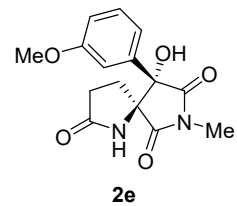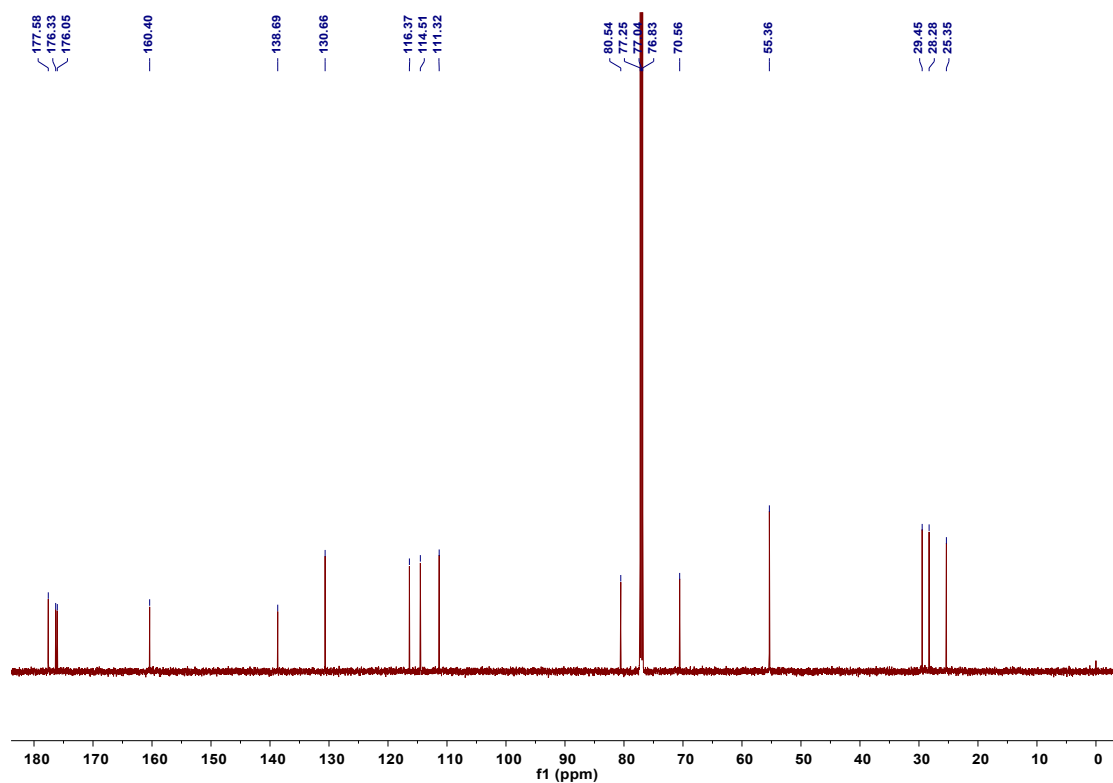

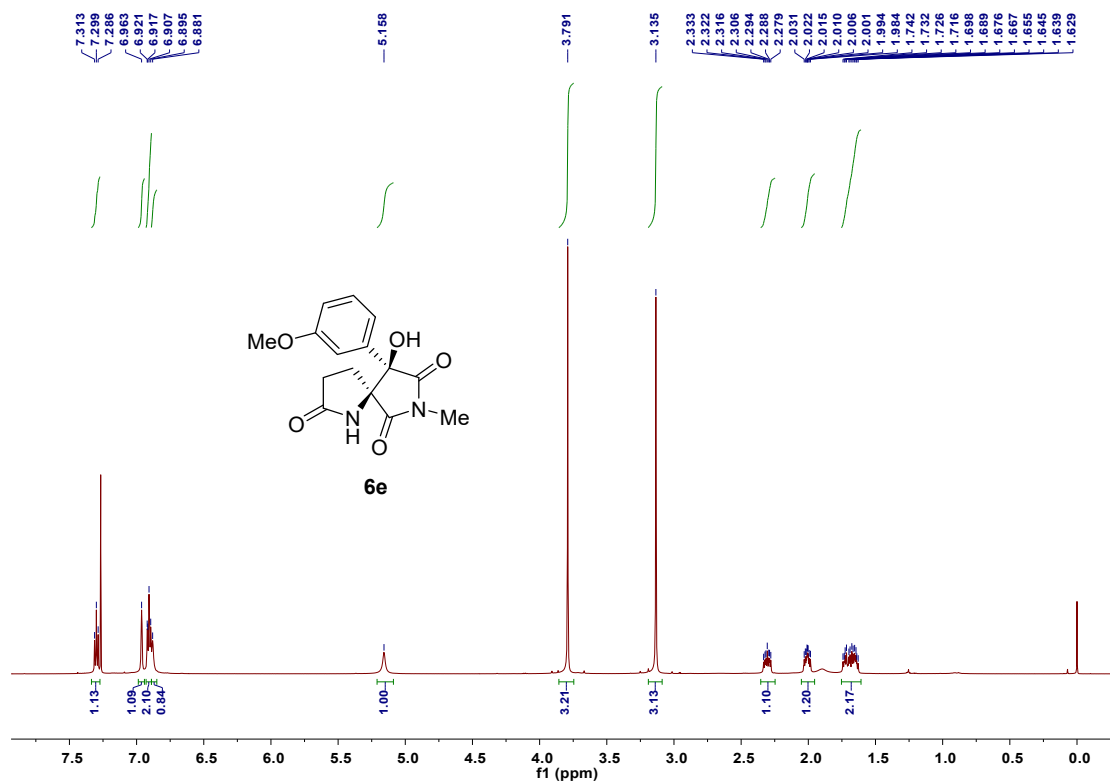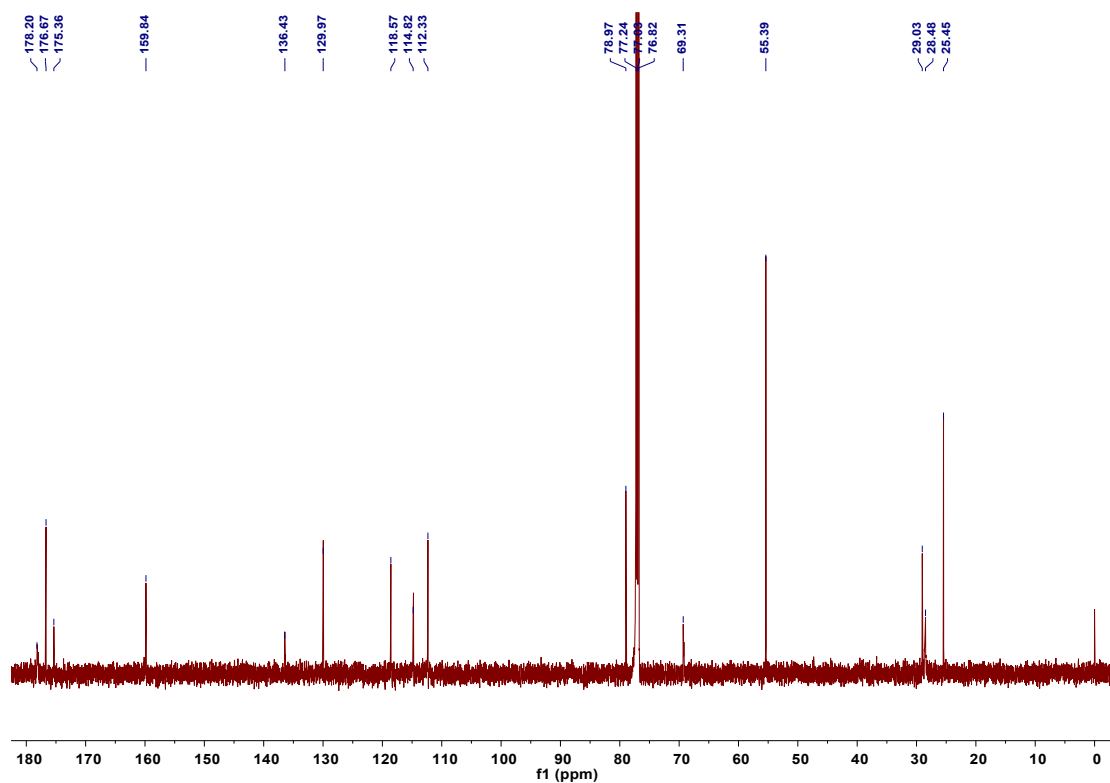



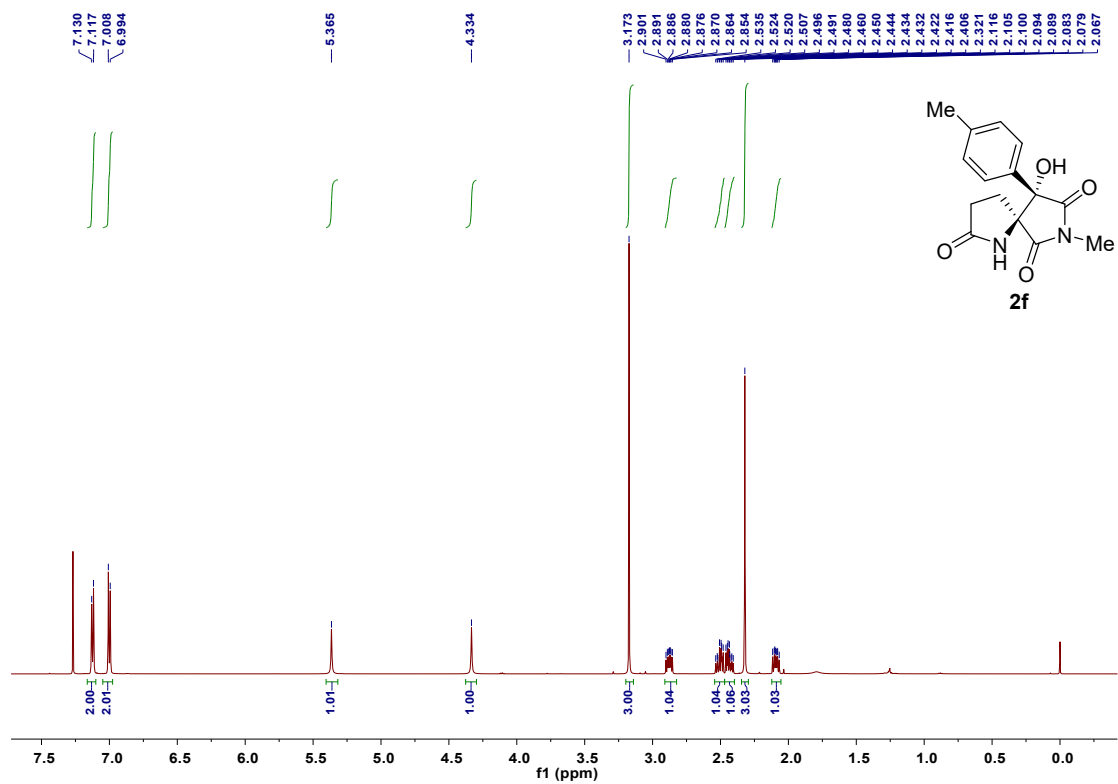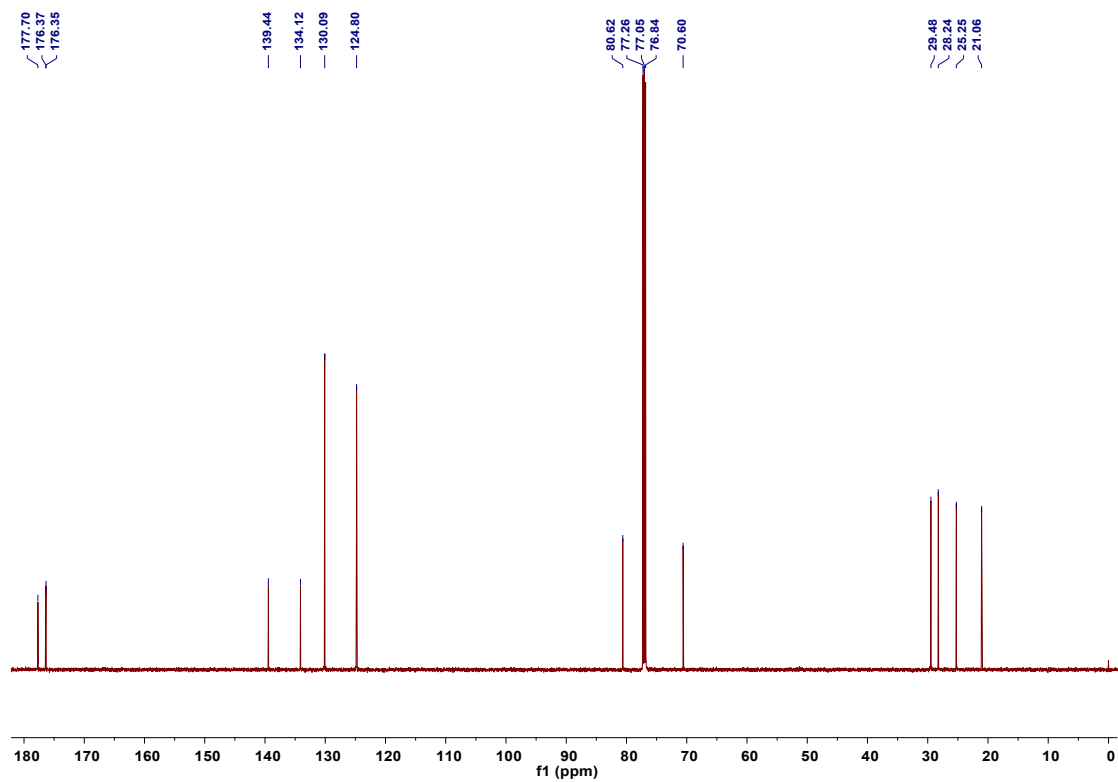

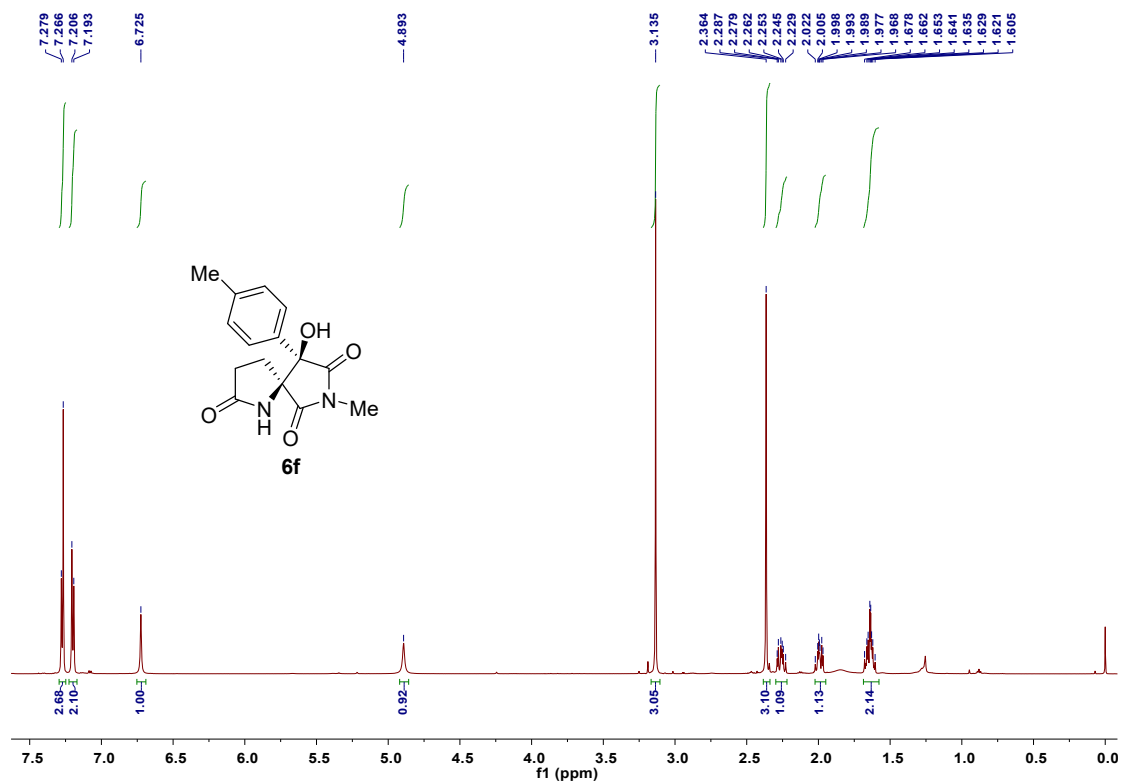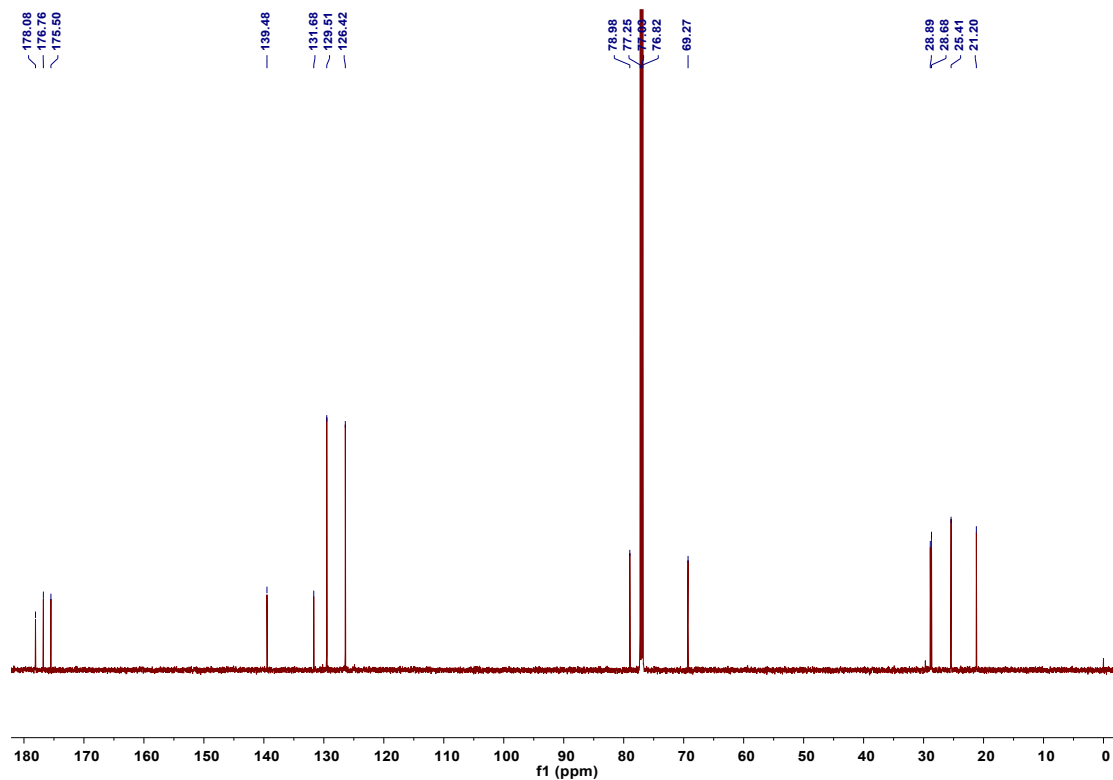

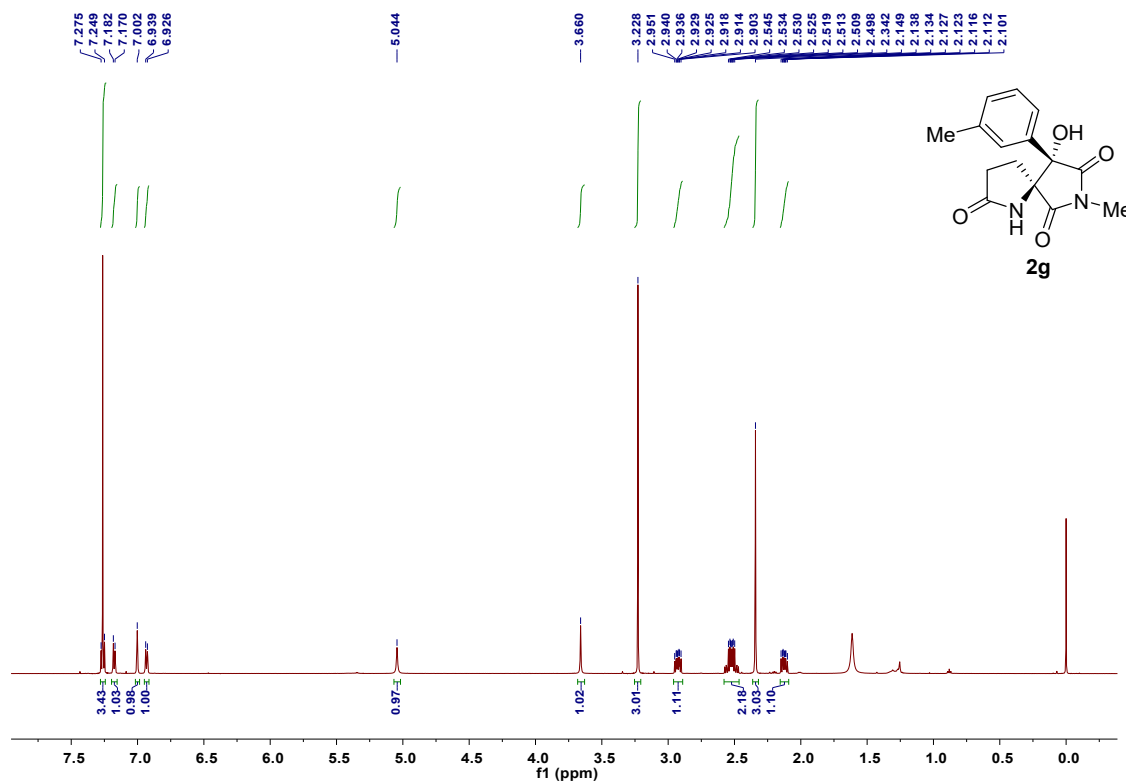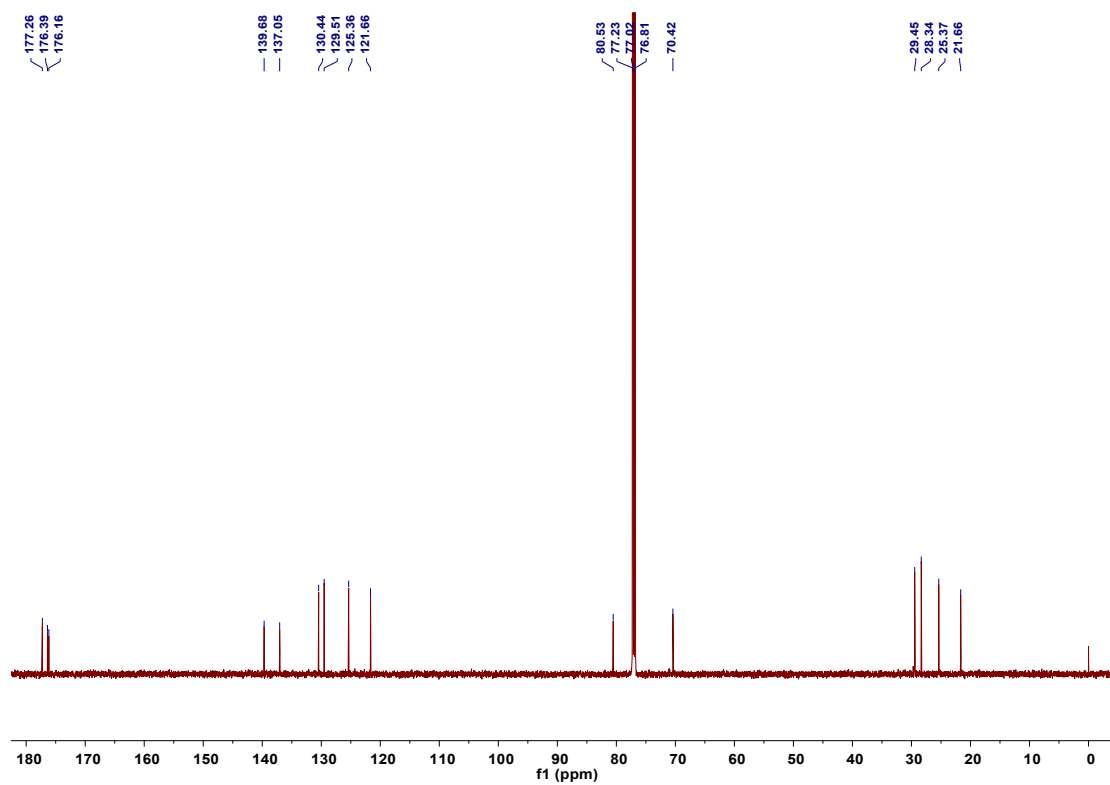

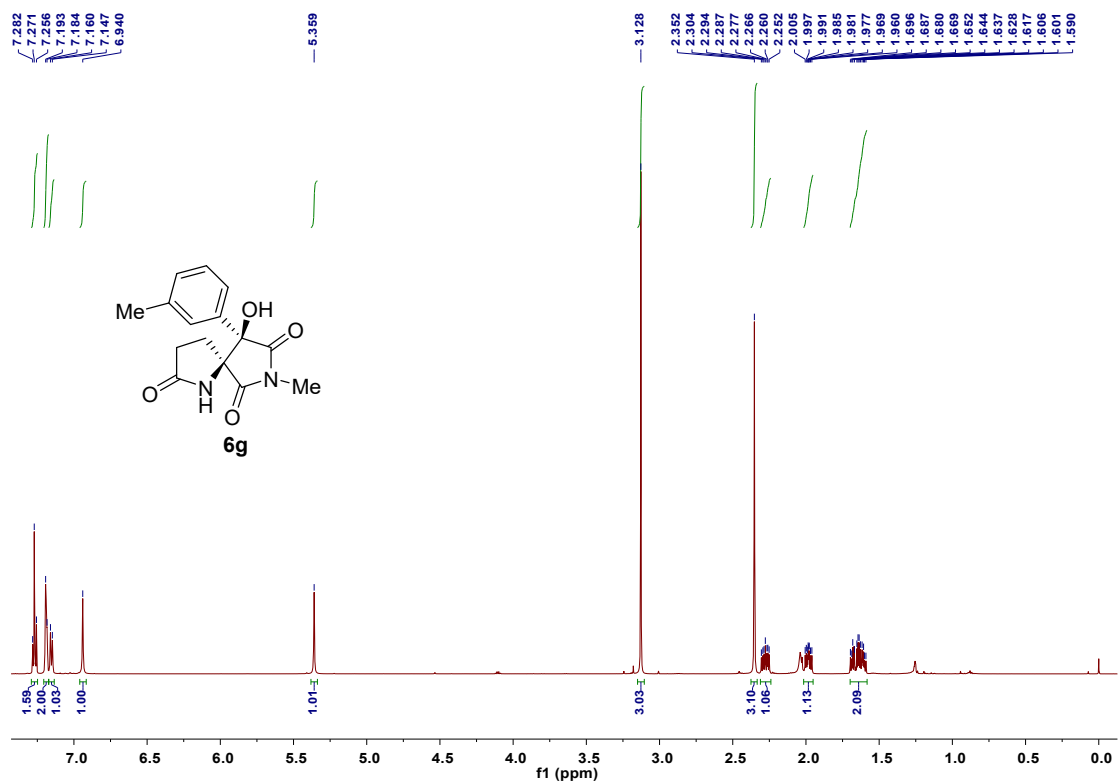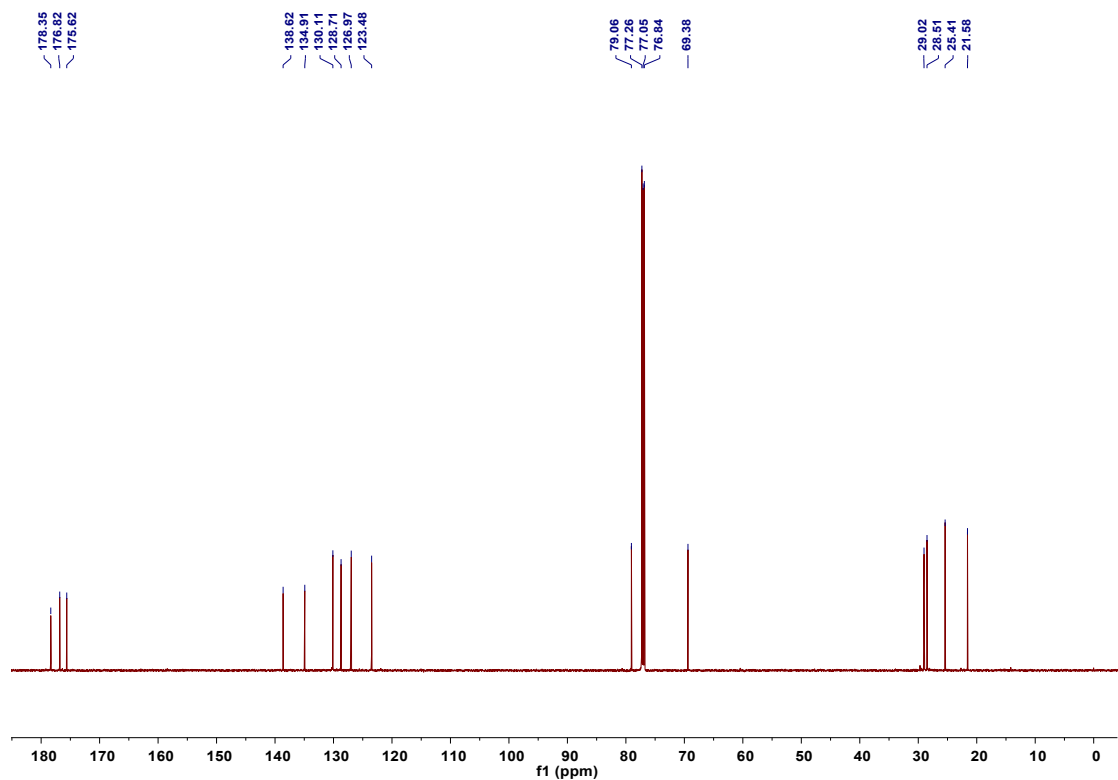

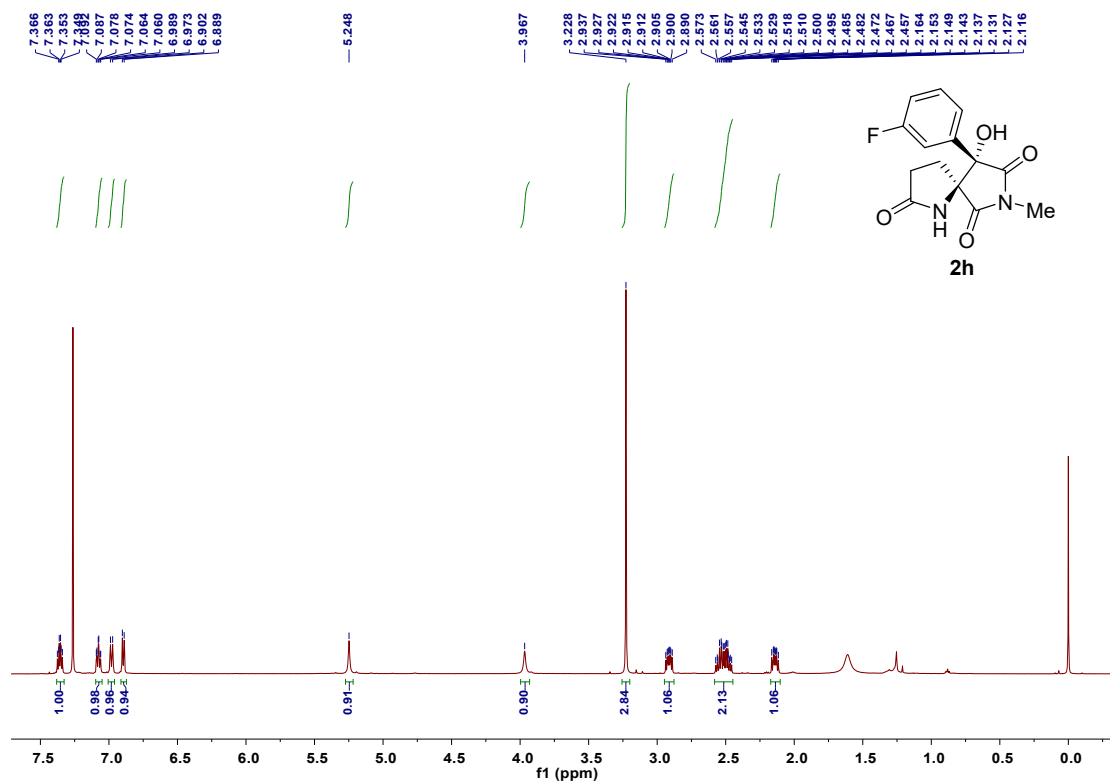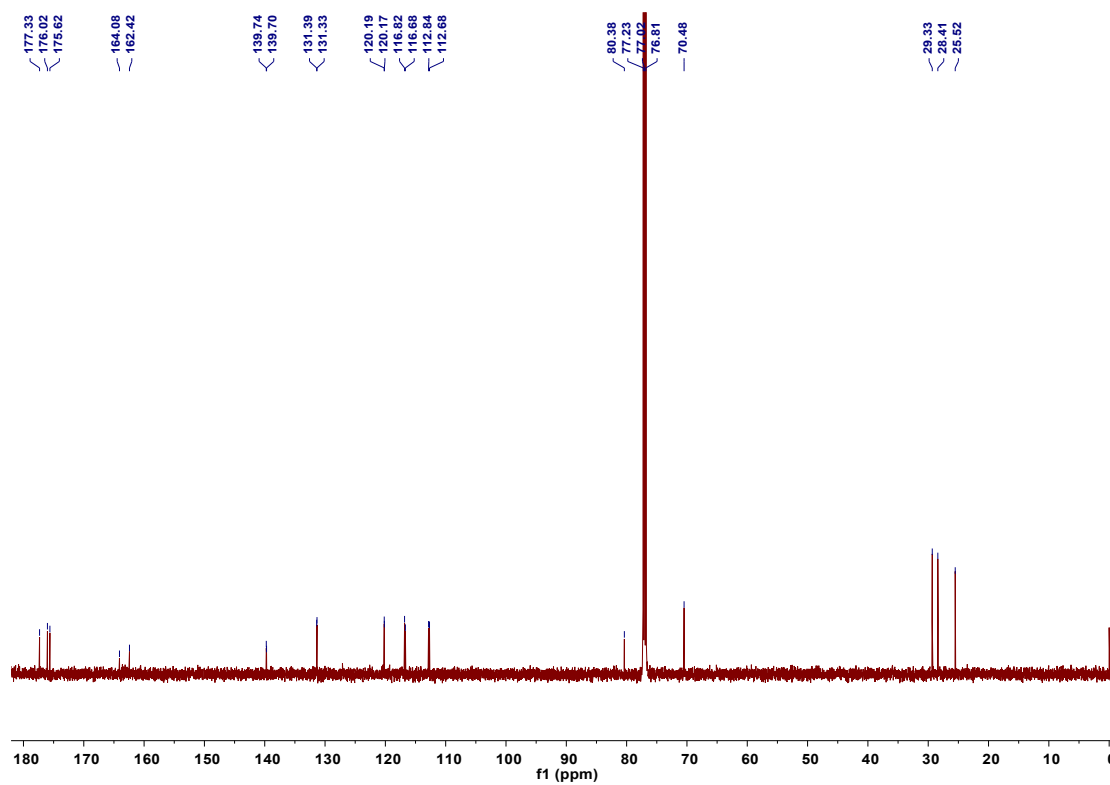

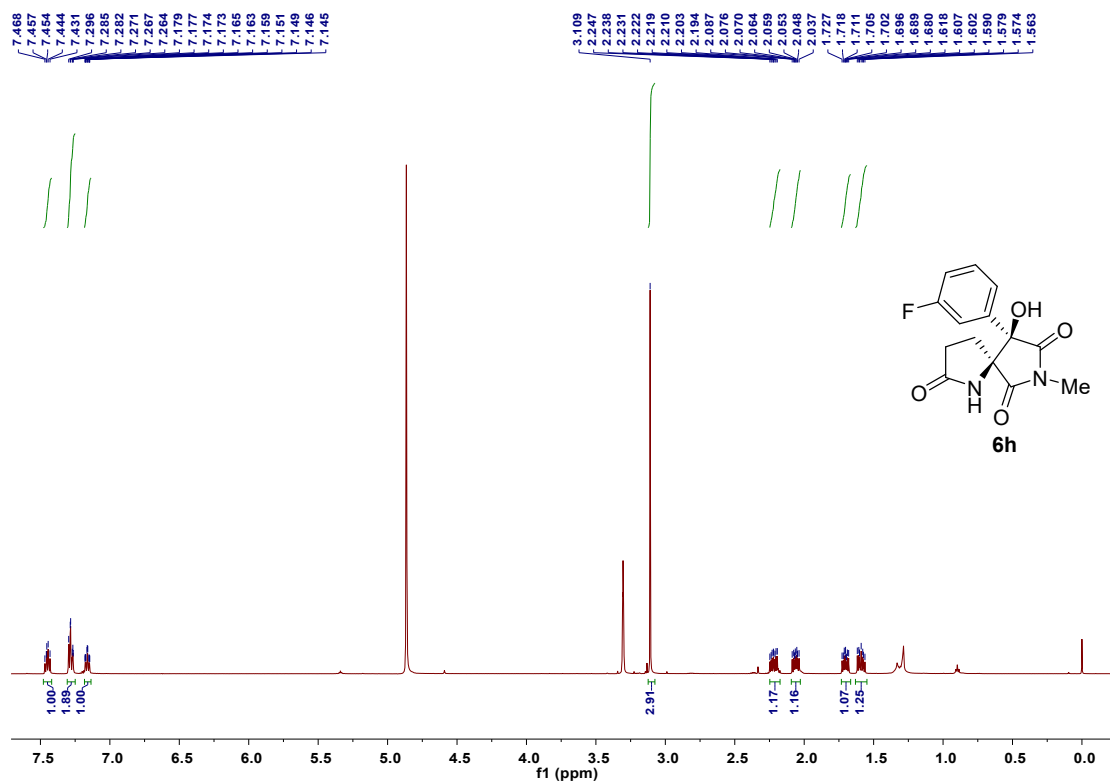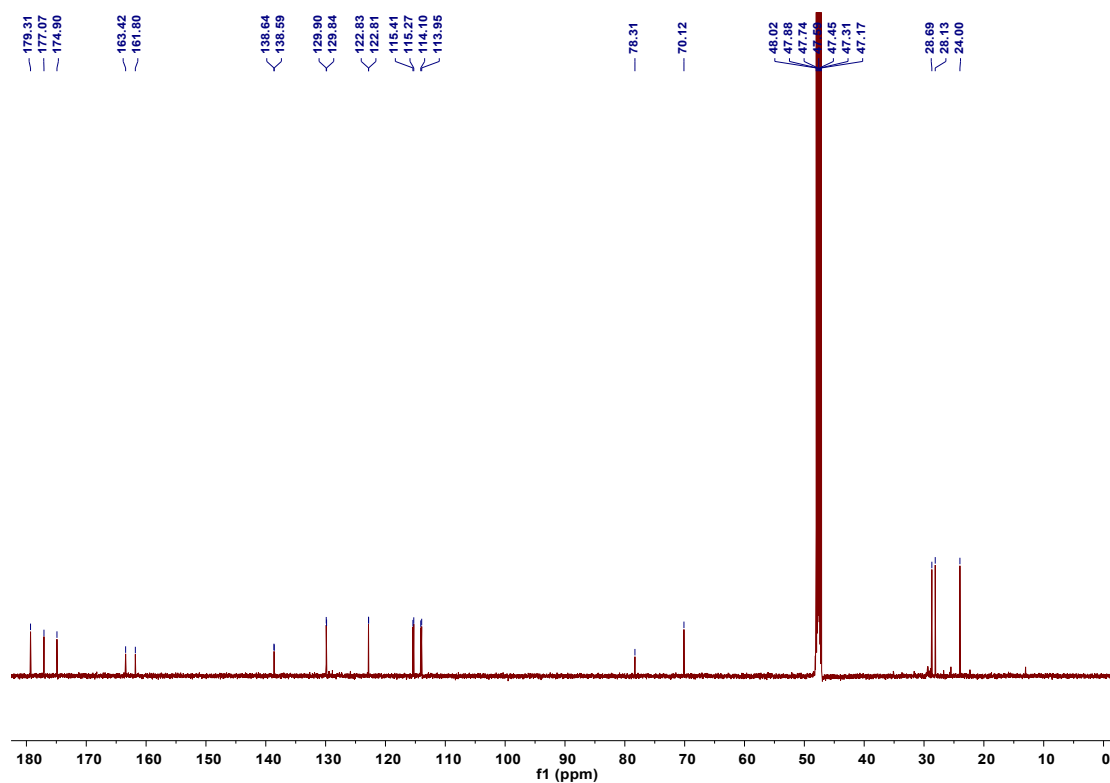

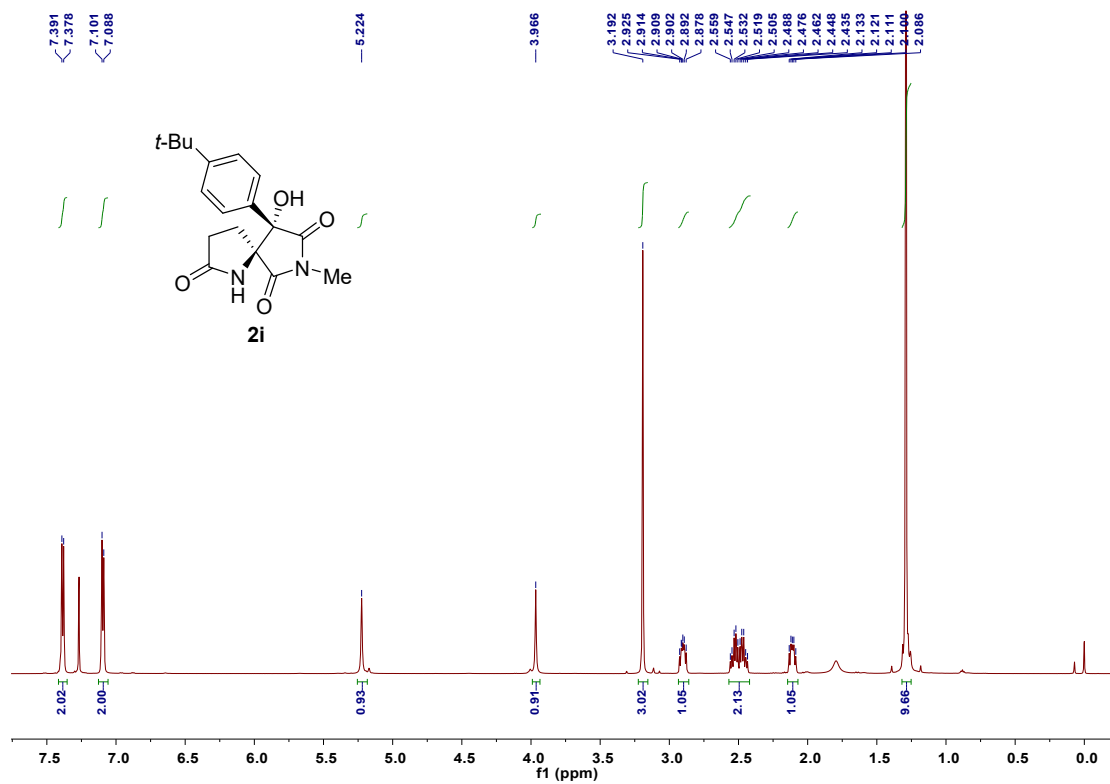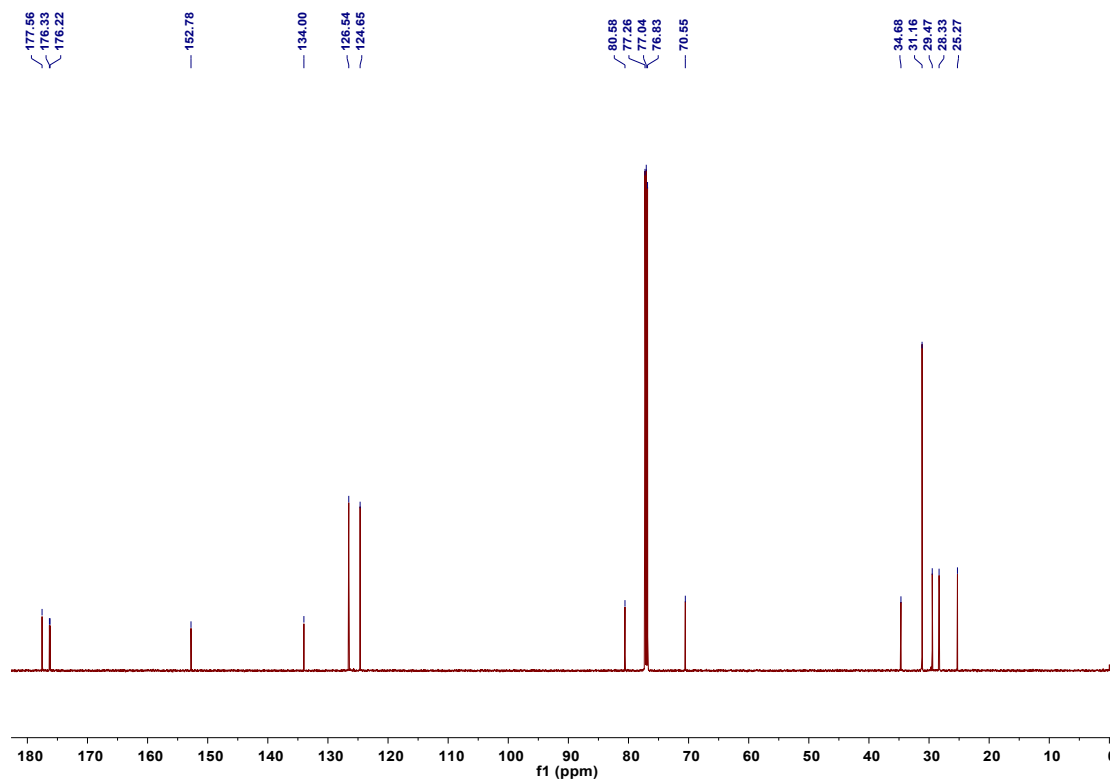

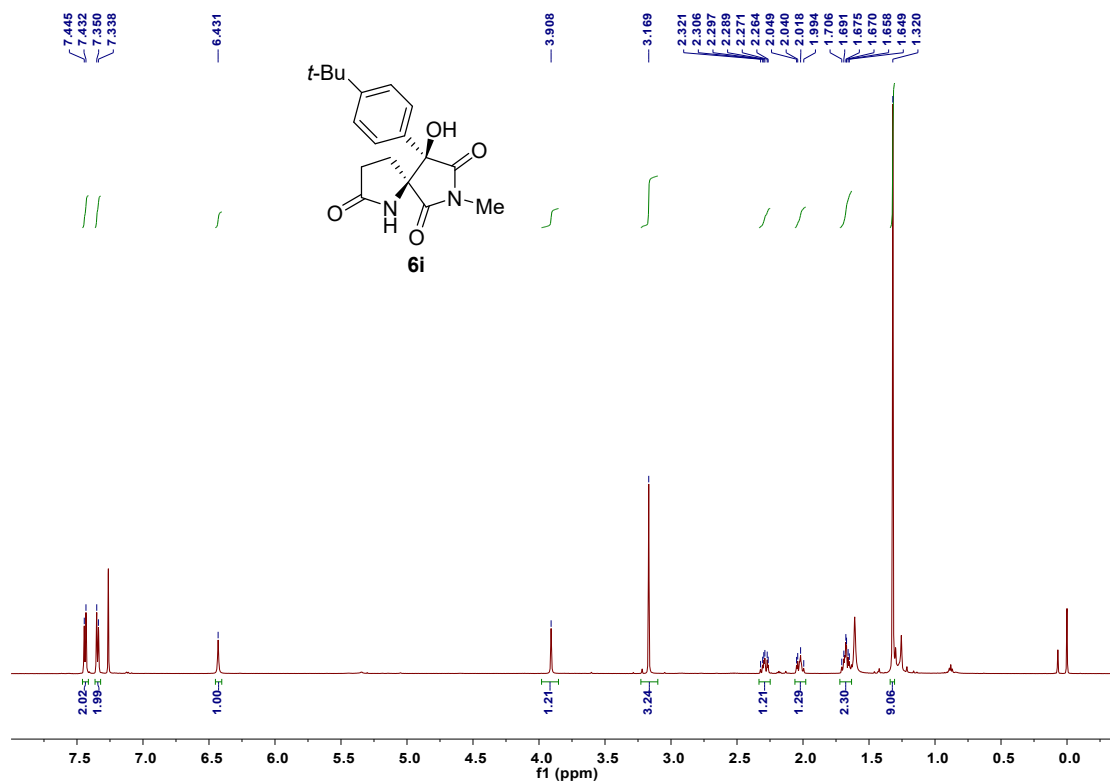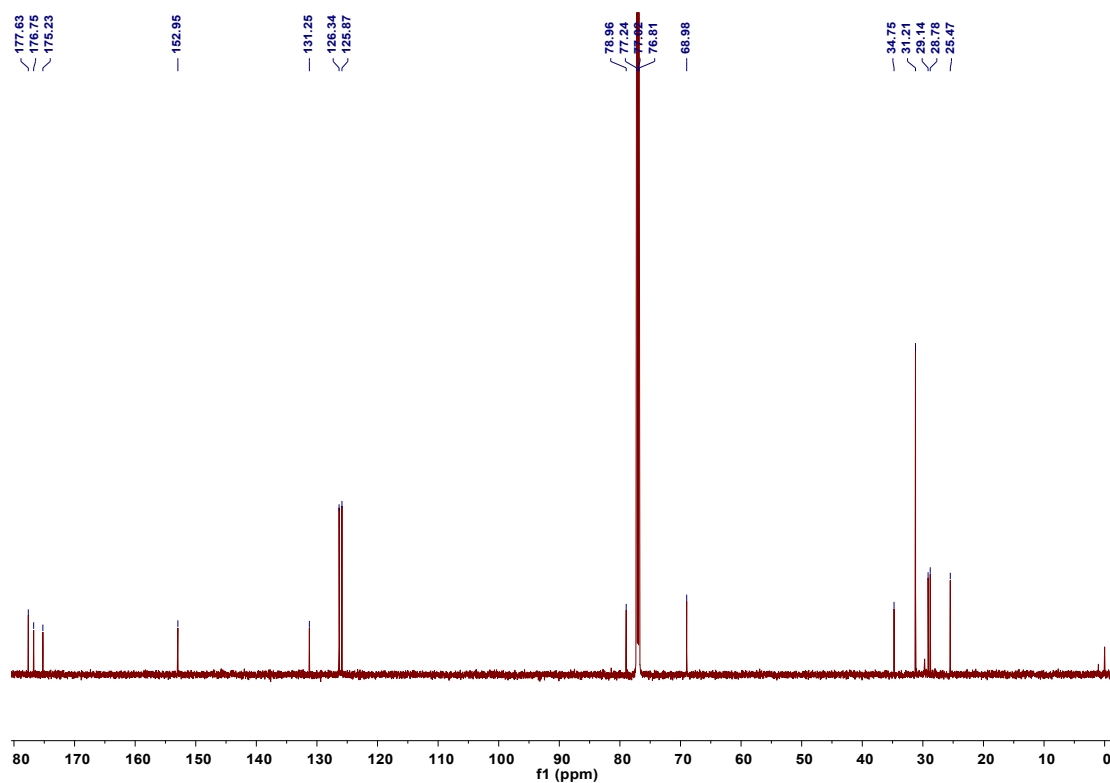



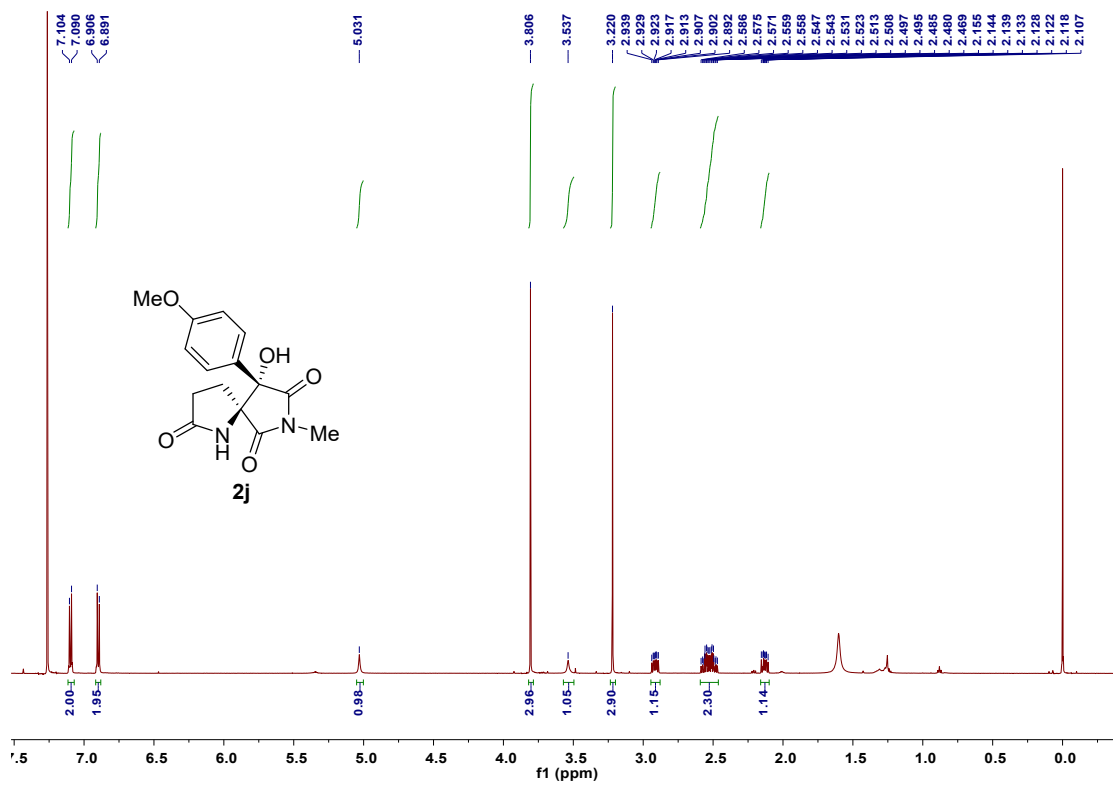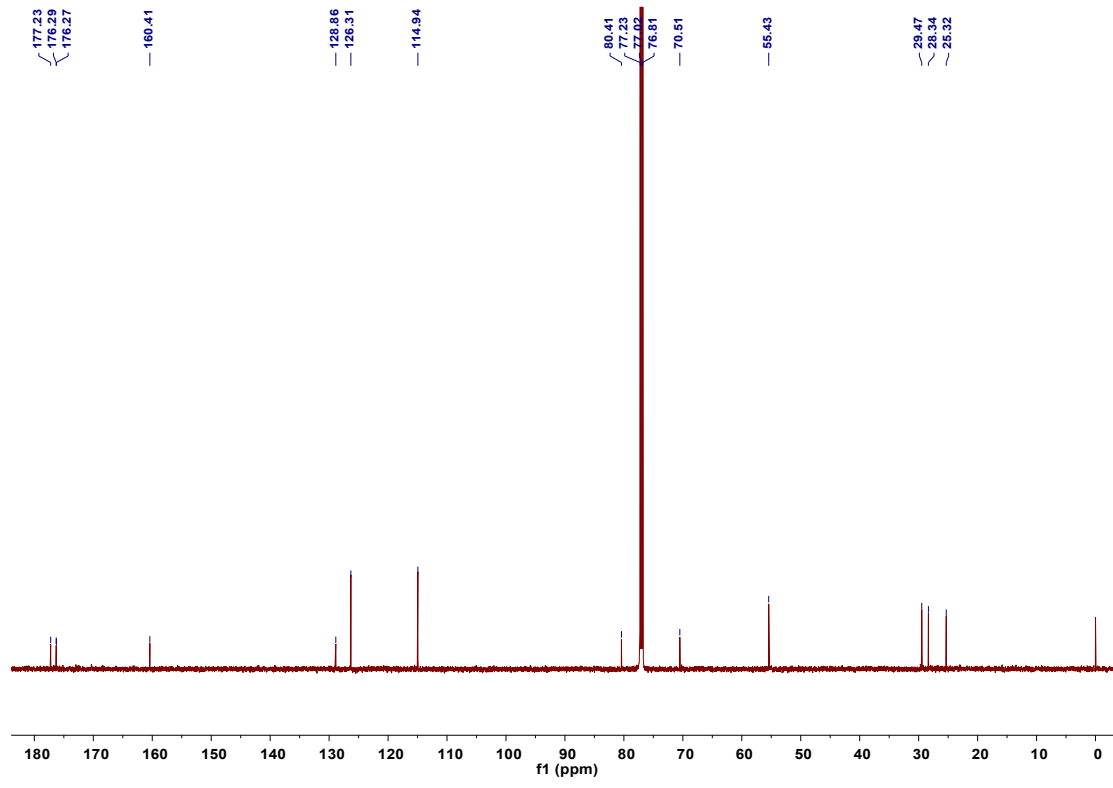

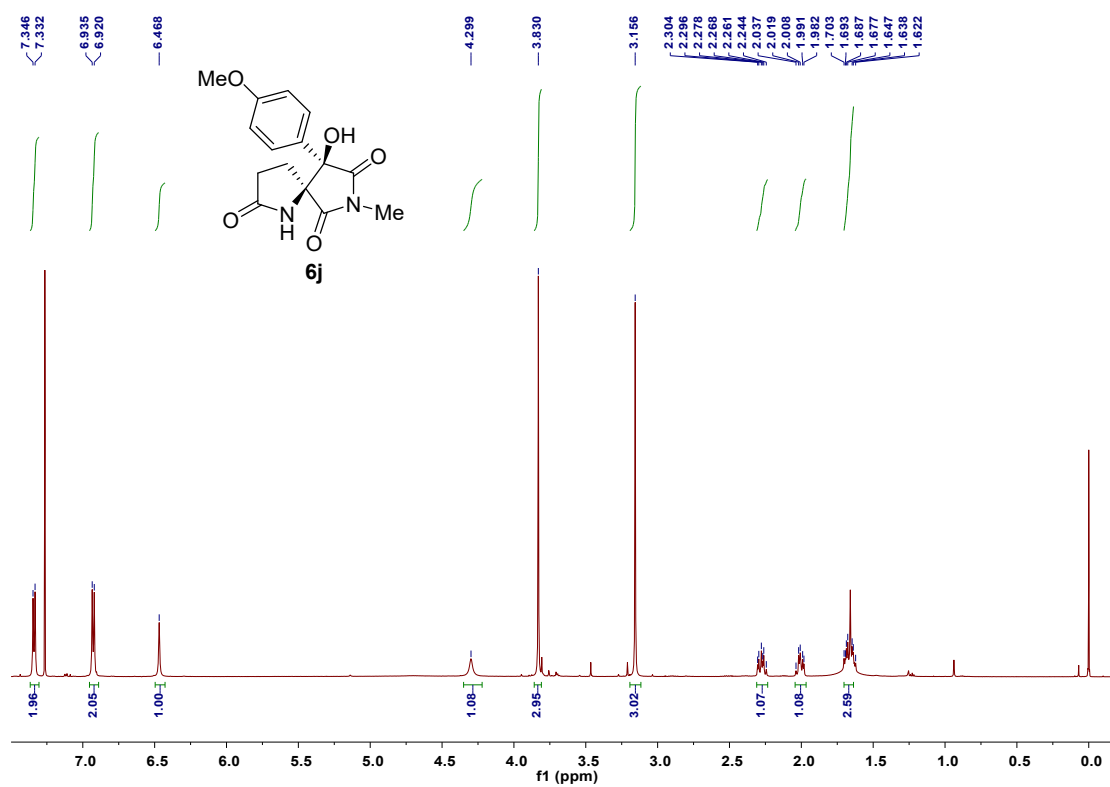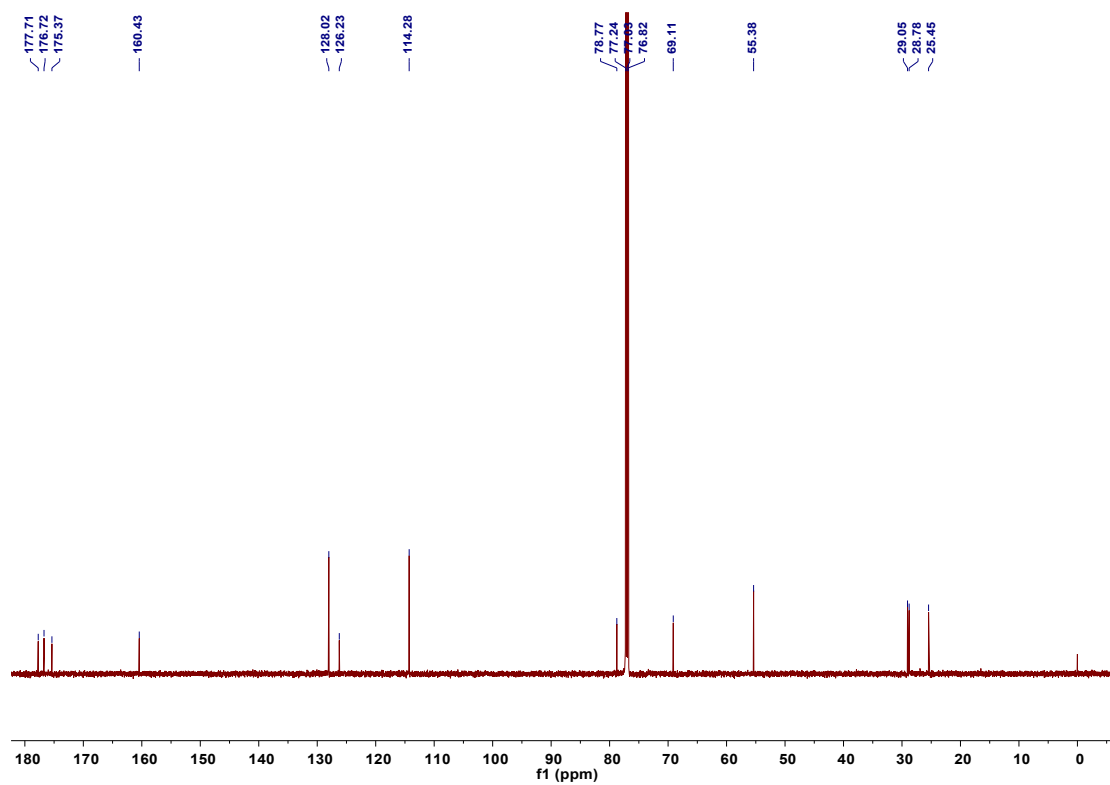

## 5. X-Ray Structure of 6a (CCDC-2133176)

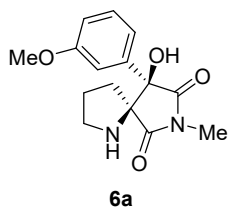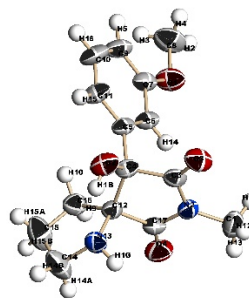

|                                   |                                                                                                                  |
|-----------------------------------|------------------------------------------------------------------------------------------------------------------|
| Identification code               | cu_2021052788D2_0m                                                                                               |
| Empirical formula                 | C <sub>15</sub> H <sub>17</sub> N <sub>2</sub> O <sub>4</sub>                                                    |
| Formula weight                    | 289.30                                                                                                           |
| Temperature                       | 305(2) K                                                                                                         |
| Wavelength                        | 1.54178 Å                                                                                                        |
| Crystal system, space group       | Orthorhombic, P2(1)2(1)2(1)                                                                                      |
| Unit cell dimensions              | a = 7.42380(10) Å    alpha = 90 deg.<br>b = 9.5641(2) Å    beta = 90 deg.<br>c = 20.7146(4) Å    gamma = 90 deg. |
| Volume                            | 1470.78(5) Å <sup>3</sup>                                                                                        |
| Z, Calculated density             | 4, 1.307 Mg/m <sup>3</sup>                                                                                       |
| Absorption coefficient            | 0.795 mm <sup>-1</sup>                                                                                           |
| F(000)                            | 612                                                                                                              |
| Crystal size                      | 0.200 x 0.200 x 0.150 mm                                                                                         |
| Theta range for data collection   | 5.093 to 65.164 deg.                                                                                             |
| Limiting indices                  | -8 ≤ h ≤ 7, -11 ≤ k ≤ 11, -24 ≤ l ≤ 24                                                                           |
| Reflections collected / unique    | 15248 / 2505 [R(int) = 0.0423]                                                                                   |
| Completeness to theta = 65.164    | 99.6 %                                                                                                           |
| Refinement method                 | Full-matrix least-squares on F <sup>2</sup>                                                                      |
| Data / restraints / parameters    | 2505 / 0 / 198                                                                                                   |
| Goodness-of-fit on F <sup>2</sup> | 1.062                                                                                                            |
| Final R indices [I > 2σ(I)]       | R1 = 0.0391, wR2 = 0.1109                                                                                        |
| R indices (all data)              | R1 = 0.0408, wR2 = 0.1132                                                                                        |
| Absolute structure parameter      | 0.20(7)                                                                                                          |
| Extinction coefficient            | n/a                                                                                                              |
| Largest diff. peak and hole       | 0.271 and -0.180 e.Å <sup>-3</sup>                                                                               |

## 6. References and Notes

- 1 E. R. Humphreys, J.-B. Hong and K. L. Green, Chiral Synthesis of an  $\alpha$ -Tetrasubstituted Proline Derivative. *Synth. Commun.* 2011, **41**, 2256-2264.
- 2 D. C. Harrowven, D. P. Curran, S. L. Kostiuk, I. L. Wallis-Guy, S. Whiting, K. J. Stenning, B. Tang, E. Packard and L. Nanson, Potassium Carbonate-Silica: a Highly Effective Stationary Phase for the Chromatographic Removal of Organotin Impurities. *Chem. Commun.* 2010, **46**, 6335-6337.
- 3 Compound **10** had the phenomenon of atropisomer, which was not reported in the previous literature. We speculated that the steric hindrance of the N-1 methyl group prevented the free rotation of the C9-C10 bond.
- 4 W. Xu, J. Zhao, C. Tao, H. Wang, Y. Li, B. Cheng and H. Zhai, Collective Total Synthesis of (-)-Lundurines A-C. *Org. Lett.* 2018, **20**, 1509-1512.
- 5 B. D. Morris and M. R. Prinsep, Amathaspiramides A-F, Novel Brominated Alkaloids from the Marine Bryozoan *Amathia Wilsoni*. *J. Nat. Prod.* 1999, **62**, 688-693.
